# Supplementary material
Source: Research Square preprint supplement (doi:10.21203/rs.3.rs-8884320/v1)
Supplement: Supplementary file 1 [file 0702ed10e3f17b89d7887355.xlsx]

## Sheet: Nip_Na vs Nip_Mock
Supplemental Table 1. Differentially expressed genes in roots in response to NaCl treatment.
Gene ID	log2 (Nip_Na vs Nip_Mock)	Qvalue (Nip_Na vs Nip_Mock)
Os01g0101900	-2.98487	5.59101e-07
Os01g0102000	-1.03081	0.00011361
Os01g0102900	-1.68486	1.67309e-120
Os01g0104200	-1.26668	0.00142467
Os01g0105300	1.48236	0.0138314
Os01g0106400	1.08871	3.70635e-27
Os01g0108600	1.25018	2.69321e-10
Os01g0109201	0.877451	4.19789e-05
Os01g0110400	1.54884	1.58647e-135
Os01g0111100	-1.26027	0.0395299
Os01g0111700	0.758246	0.0431457
Os01g0111800	-0.535627	4.3852e-07
Os01g0112100	0.584526	0.0168309
Os01g0113300	0.815273	6.58215e-05
Os01g0113325	2.09621	0.0363557
Os01g0113400	0.572847	0.00031438
Os01g0113700	0.755153	2.43056e-15
Os01g0113800	0.538276	0.0189602
Os01g0114600	2.05686	0.0311064
Os01g0115900	0.848895	0.000307746
Os01g0116200	3.84326	0.00170219
Os01g0116900	-1.3317	0.00042022
Os01g0116901	-2.1318	0.00539947
Os01g0119100	0.573952	3.17554e-10
Os01g0121000	-1.10151	0.0284032
Os01g0124100	1.42331	4.92809e-66
Os01g0124650	3.00822	1.85782e-200
Os01g0124700	2.68411	2.10971e-53
Os01g0126900	-0.574509	5.12356e-05
Os01g0127000	-2.32482	1.66257e-99
Os01g0127200	-3.53122	1.26994e-20
Os01g0127600	-0.867783	5.4945e-104
Os01g0128100	2.61353	2.74982e-15
Os01g0128200	0.839501	0.000199815
Os01g0128300	-0.990245	1.51994e-05
Os01g0129600	-1.71948	0.0225954
Os01g0130400	0.851486	1.36534e-30
Os01g0131450	0.635395	4.48065e-34
Os01g0131600	0.779162	1.01067e-32
Os01g0132000	1.93539	3.8814e-304
Os01g0138300	0.630522	0.0366267
Os01g0138500	-2.01346	1.55492e-23
Os01g0138800	2.11028	8.83241e-47
Os01g0140100	-0.554287	0.00357663
Os01g0142100	1.59217	7.07936e-06
Os01g0142300	-1.41104	1.25376e-22
Os01g0144100	0.832728	0.012031
Os01g0144900	1.1844	0.00798389
Os01g0147900	0.768624	3.53869e-109
Os01g0149800	1.79647	9.0295e-249
Os01g0150200	-0.767059	3.16789e-26
Os01g0152600	-0.725711	0.0117119
Os01g0155200	-2.24325	0.00397226
Os01g0155800	1.29784	5.00514e-55
Os01g0159200	-0.755725	2.84505e-07
Os01g0159800	1.18982	4.22649e-21
Os01g0160100	2.16265	1.19188e-180
Os01g0160200	5.02971	0.00648596
Os01g0160800	1.37534	0.000114156
Os01g0162500	1.3482	0.0184563
Os01g0164075	-2.69807	0.0106356
Os01g0164300	-3.89459	1.32973e-09
Os01g0164500	0.571865	2.75163e-06
Os01g0164600	0.702982	0.000233826
Os01g0165100	1.22897	1.73966e-10
Os01g0165200	-0.620052	0.000107439
Os01g0166700	-0.516125	5.38702e-14
Os01g0168800	-0.758433	9.42576e-26
Os01g0170500	-0.593824	1.24664e-06
Os01g0172100	0.773147	0.000306085
Os01g0172600	-0.601959	0.0249312
Os01g0172800	-0.517889	0.00231332
Os01g0173900	0.618247	4.18051e-18
Os01g0174100	-1.2558	2.47053e-12
Os01g0174700	0.914812	0.0130451
Os01g0175100	-0.863116	2.78357e-07
Os01g0175850	1.66425	0.0194566
Os01g0176500	-0.599232	4.05636e-08
Os01g0176800	-0.597322	0.000452988
Os01g0177900	1.56393	2.96552e-22
Os01g0178200	-0.631459	0.0060693
Os01g0178300	0.65387	1.31636e-09
Os01g0179600	1.28406	0.000336378
Os01g0183300	1.31738	8.34259e-17
Os01g0183600	0.797474	0.000534999
Os01g0184100	1.06437	5.15627e-13
Os01g0185500	-0.785363	3.79669e-15
Os01g0187900	1.21937	3.24843e-34
Os01g0190400	0.632541	2.39851e-05
Os01g0190500	-0.808469	0.0198545
Os01g0191200	2.04902	3.38355e-21
Os01g0191700	2.30284	0
Os01g0191800	-0.632676	1.03829e-08
Os01g0192900	-2.06558	1.82089e-19
Os01g0193600	0.509999	0.0072615
Os01g0194000	-0.524537	0.0020818
Os01g0195400	-0.559264	1.24464e-05
Os01g0198500	-0.668262	0.000375557
Os01g0198900	-2.09601	7.5453e-21
Os01g0200400	-0.512397	2.9131e-06
Os01g0200600	-4.53363	0.00859589
Os01g0202500	-0.645846	0.0302489
Os01g0205600	-0.544502	0.0181796
Os01g0205900	-1.74923	1.00572e-06
Os01g0207400	-1.19593	1.09438e-06
Os01g0208700	0.588877	9.40311e-09
Os01g0210500	1.06896	8.61325e-34
Os01g0210550	1.10196	0.0423093
Os01g0210600	-0.540855	3.22619e-06
Os01g0211200	-1.25685	0.00359183
Os01g0211600	-0.81837	8.31035e-09
Os01g0211800	-0.887721	0.0140294
Os01g0212400	-0.819935	4.19119e-66
Os01g0214500	1.72164	8.80068e-06
Os01g0214600	1.03223	3.13739e-38
Os01g0216000	-3.12015	1.33843e-220
Os01g0216400	-0.890446	0.043484
Os01g0218100	-0.67327	4.31587e-53
Os01g0218200	-0.802863	1.13278e-10
Os01g0219300	0.736125	7.2713e-17
Os01g0220100	1.01678	3.17237e-37
Os01g0220500	1.90091	5.07006e-26
Os01g0221000	-1.64764	7.3635e-05
Os01g0221100	-1.2475	1.80787e-18
Os01g0222500	-0.723167	4.58145e-13
Os01g0222600	-1.61811	5.27047e-63
Os01g0223800	1.14622	7.58306e-10
Os01g0224700	0.863003	0.00659085
Os01g0226300	-0.898014	2.80766e-35
Os01g0226600	-1.5339	0.029378
Os01g0227100	-0.855201	3.61234e-17
Os01g0231800	0.553012	4.2699e-26
Os01g0231950	-3.89268	0.0478084
Os01g0232000	-4.65384	0.0257669
Os01g0232700	0.523272	1.74489e-13
Os01g0233000	-0.934566	3.81181e-148
Os01g0233100	-0.897937	0.000353269
Os01g0237000	-2.18501	5.14079e-50
Os01g0237500	-3.50449	1.25687e-50
Os01g0237750	-3.30512	3.77293e-24
Os01g0239200	0.629803	2.84795e-41
Os01g0241000	-0.565141	0.00344942
Os01g0243700	-0.767189	3.13576e-13
Os01g0243800	1.0832	0.0160986
Os01g0246400	1.49598	0.0161708
Os01g0247700	-1.27755	7.55418e-45
Os01g0248000	0.7418	0.00334305
Os01g0248400	0.573536	3.60646e-31
Os01g0248500	0.851984	4.62179e-10
Os01g0248900	-0.884172	0.00831536
Os01g0249200	0.527352	1.30721e-17
Os01g0249700	-3.49153	0.00156416
Os01g0249800	-2.07405	4.97069e-15
Os01g0253800	0.914386	0.00528842
Os01g0256500	0.796593	1.4553e-16
Os01g0257100	-0.512102	1.96356e-05
Os01g0257300	1.0184	3.2819e-21
Os01g0260100	-0.522144	2.24851e-11
Os01g0262500	-0.787106	2.05344e-05
Os01g0263000	-0.86806	1.18631e-21
Os01g0264600	-1.34211	0.007965
Os01g0265100	-0.712278	4.70947e-25
Os01g0266500	1.03038	7.43957e-41
Os01g0266800	1.73642	4.51687e-73
Os01g0268100	0.787213	1.05485e-16
Os01g0271700	0.618264	0.0190409
Os01g0273100	-0.69557	0.000408815
Os01g0274800	1.13929	0.00634151
Os01g0275300	0.802284	2.10157e-05
Os01g0275950	-0.601231	0.0291205
Os01g0276500	0.554764	2.05282e-07
Os01g0278900	1.20578	0.00138293
Os01g0279000	-1.22457	3.23555e-11
Os01g0279100	0.752594	2.03774e-06
Os01g0280500	4.13198	4.82977e-29
Os01g0281301	1.02731	0.040257
Os01g0283300	-0.535439	1.4086e-13
Os01g0284500	-1.2897	1.54538e-247
Os01g0285300	-1.15556	1.56858e-35
Os01g0286600	0.800612	0.00356614
Os01g0288200	-1.14574	0.00601197
Os01g0294500	-2.41603	2.32695e-63
Os01g0294700	-1.26399	8.83291e-198
Os01g0296200	-1.21112	7.03978e-18
Os01g0296450	-1.49254	5.63906e-12
Os01g0296700	-1.45906	5.12406e-11
Os01g0297200	0.552804	1.78294e-10
Os01g0297700	0.757608	0.00158601
Os01g0299500	-0.812523	3.16178e-36
Os01g0303000	1.49937	4.49115e-13
Os01g0303600	-1.15129	8.61763e-11
Os01g0303800	-0.594927	0.00031646
Os01g0306400	4.19173	1.28773e-09
Os01g0306800	0.773663	4.81389e-05
Os01g0307500	-1.06614	4.37988e-08
Os01g0307624	1.78525	5.68328e-08
Os01g0307686	2.74138	3.85639e-11
Os01g0309100	0.707719	5.26804e-07
Os01g0309800	-1.36157	7.18965e-08
Os01g0313300	1.20795	1.90379e-07
Os01g0314100	0.524912	2.66688e-15
Os01g0314800	0.842867	6.96659e-30
Os01g0316100	1.65971	0.00213043
Os01g0316600	0.58683	4.2651e-06
Os01g0323300	1.22239	0.0334757
Os01g0323600	0.637743	1.25745e-85
Os01g0324400	0.657531	4.51824e-05
Os01g0327000	-0.766137	1.22246e-11
Os01g0327400	-0.854552	7.18329e-90
Os01g0329300	1.73838	0.00699391
Os01g0329400	0.620195	6.48699e-08
Os01g0330200	-8.17845	5.25162e-14
Os01g0332100	0.633477	2.04388e-12
Os01g0332200	1.26796	0.0139105
Os01g0336300	-1.77364	0.0289859
Os01g0337500	0.542219	0.0182693
Os01g0342900	3.22992	5.14577e-07
Os01g0343300	-0.522197	8.72347e-10
Os01g0346250	-0.783499	1.73115e-06
Os01g0347500	-4.67026	2.10915e-07
Os01g0347600	-2.57829	0
Os01g0348000	-4.67026	2.10915e-07
Os01g0348900	0.873838	2.44839e-35
Os01g0355250	-3.77914	4.6484e-56
Os01g0357100	-1.85166	0
Os01g0357150	-2.14418	3.0446e-15
Os01g0358300	1.13365	0.0220504
Os01g0359600	-0.504338	1.12493e-06
Os01g0364800	-1.16293	0.00338025
Os01g0366100	0.799423	1.07292e-07
Os01g0366300	0.618915	0.0317435
Os01g0367400	-1.18017	6.19523e-42
Os01g0367450	-1.25106	4.88183e-05
Os01g0369700	1.15723	1.05635e-84
Os01g0369900	-1.01129	4.35276e-35
Os01g0370000	-0.714347	1.20798e-05
Os01g0370750	4.60516	5.48581e-38
Os01g0370900	4.29027	0.00356183
Os01g0371500	-1.51205	3.22215e-134
Os01g0374000	5.1076	0.00481904
Os01g0374600	2.2821	0.0234202
Os01g0375200	0.561501	5.13242e-35
Os01g0382000	3.45727	0.000423807
Os01g0383100	1.61224	5.62471e-51
Os01g0383900	0.775462	0.00576316
Os01g0384800	-0.560393	1.30524e-07
Os01g0390300	0.998919	4.19294e-28
Os01g0390400	0.69079	9.72245e-10
Os01g0392600	-1.22936	5.9541e-09
Os01g0495701	1.61076	6.53307e-65
Os01g0502700	-0.540996	0.0101848
Os01g0503400	-1.11281	3.90574e-22
Os01g0504100	0.582499	0.00404229
Os01g0504500	0.557051	1.57323e-21
Os01g0504950	0.67419	1.73672e-05
Os01g0505400	0.733401	2.04957e-89
Os01g0506100	0.740284	2.70454e-05
Os01g0507700	0.604313	1.63987e-18
Os01g0508000	1.05205	4.36364e-86
Os01g0508100	-0.999112	0.000200397
Os01g0508500	0.627852	0.00313972
Os01g0510200	2.90125	1.57858e-65
Os01g0510600	0.673973	0.0105426
Os01g0511100	1.77229	1.56564e-31
Os01g0513500	0.756431	0.0152673
Os01g0514600	-0.933405	1.87539e-15
Os01g0515300	5.03422	4.80187e-17
Os01g0524500	-1.16186	1.11422e-05
Os01g0525350	1.82057	1.95832e-08
Os01g0525700	-0.969833	0.000132094
Os01g0525701	-1.17542	5.21454e-05
Os01g0528800	0.560956	2.00347e-33
Os01g0533100	0.589766	0.00963514
Os01g0537250	-2.14085	9.51165e-54
Os01g0541800	-0.629317	5.5879e-17
Os01g0543600	-2.56103	0.000321567
Os01g0546000	2.25246	4.11978e-06
Os01g0546100	-1.24624	0.0498782
Os01g0547133	-0.570207	0.013513
Os01g0550300	0.59485	5.02853e-69
Os01g0550600	-0.614745	0.033093
Os01g0550800	-1.82219	0
Os01g0550850	-1.5261	0.00363189
Os01g0551100	-1.15812	1.68744e-20
Os01g0555600	-0.504459	0.00944938
Os01g0557100	2.58733	7.52921e-21
Os01g0558700	-1.37108	0.0177269
Os01g0559600	-0.538561	2.50536e-43
Os01g0565800	-2.69692	0.0391925
Os01g0566100	-0.704346	2.34425e-25
Os01g0566500	1.44818	4.22792e-15
Os01g0571100	-1.20918	7.90872e-49
Os01g0571133	-1.34844	4.10996e-10
Os01g0571166	-1.52457	1.71081e-16
Os01g0574800	-0.807311	3.53684e-05
Os01g0575000	-0.624654	1.1992e-43
Os01g0580200	0.54965	5.17946e-12
Os01g0587300	1.14231	0.0160043
Os01g0588100	-0.966102	1.74324e-51
Os01g0593200	0.919458	2.09228e-34
Os01g0593500	0.5026	0.0135926
Os01g0594300	-0.877891	8.90238e-18
Os01g0595600	1.19542	0.000285656
Os01g0597800	1.70217	3.24238e-40
Os01g0598600	0.62893	6.71188e-07
Os01g0601700	0.584506	0.00605232
Os01g0602400	2.70879	7.27472e-06
Os01g0604100	-0.6955	0.00694189
Os01g0605000	0.765492	0.000431305
Os01g0605100	1.05767	1.80685e-44
Os01g0605500	-0.500335	0.000667718
Os01g0605700	-3.06593	1.23727e-05
Os01g0607200	-0.538655	5.08887e-05
Os01g0607900	-0.833629	6.86125e-11
Os01g0608000	1.40303	5.35865e-15
Os01g0608101	1.21679	2.60291e-10
Os01g0608400	-0.791032	0.0118229
Os01g0608900	0.728827	0.0157496
Os01g0609200	2.7125	4.72235e-15
Os01g0609300	1.8985	4.52125e-92
Os01g0611000	-1.08844	1.41983e-65
Os01g0612500	0.919728	1.3533e-06
Os01g0613800	2.34835	1.25128e-21
Os01g0616300	-0.729582	0.000122192
Os01g0616366	-0.816776	3.2451e-05
Os01g0616600	0.548537	0.0307248
Os01g0617600	0.755779	2.05108e-08
Os01g0617800	0.535865	0.0110219
Os01g0618400	0.557551	0.00189547
Os01g0620301	1.50558	0.0191183
Os01g0620900	1.07683	0.00399304
Os01g0621900	1.69445	0
Os01g0623600	1.32437	6.84598e-11
Os01g0623900	0.89483	0.00118818
Os01g0624700	-1.51921	0.00547919
Os01g0626400	0.996696	0.000583556
Os01g0626500	0.585969	5.983e-09
Os01g0627400	1.23006	3.39236e-52
Os01g0627500	0.957077	4.49962e-94
Os01g0627600	0.968642	8.16856e-18
Os01g0627800	7.21079	4.53766e-08
Os01g0627967	2.00035	1.51595e-05
Os01g0628700	-0.707311	8.50203e-14
Os01g0631200	-0.561785	4.39449e-16
Os01g0631700	-1.13429	4.10257e-33
Os01g0633400	1.99208	1.74665e-06
Os01g0636400	0.639805	7.05625e-20
Os01g0638000	2.1937	3.35697e-76
Os01g0638600	0.855601	4.71768e-11
Os01g0642000	-1.11008	1.46321e-06
Os01g0642200	-0.644823	1.621e-05
Os01g0644000	1.45773	1.62399e-23
Os01g0645000	-0.918958	2.32621e-08
Os01g0646400	-0.988225	0.0143679
Os01g0647150	0.703542	0.000446664
Os01g0647200	3.82351	1.54736e-87
Os01g0648000	-0.837659	7.67217e-15
Os01g0649900	0.926281	3.67786e-25
Os01g0652100	0.516988	7.70587e-05
Os01g0652600	0.673698	2.38463e-119
Os01g0652650	1.11936	0.000432251
Os01g0655500	1.94112	0
Os01g0656600	0.620345	3.30418e-21
Os01g0658900	1.1528	4.5757e-39
Os01g0659900	0.56288	4.55979e-06
Os01g0660000	0.890379	0.021147
Os01g0660300	-0.604555	2.97968e-09
Os01g0661500	-0.768568	7.11537e-14
Os01g0662700	1.33531	1.28806e-09
Os01g0663300	0.878021	1.00591e-16
Os01g0664100	1.33276	1.19505e-32
Os01g0666000	-0.897766	0.00458306
Os01g0667600	-0.618132	1.3533e-06
Os01g0668100	-1.5554	4.70361e-106
Os01g0670200	0.728974	0.0410261
Os01g0677900	0.703802	0.00691122
Os01g0678100	1.58708	0.0427518
Os01g0679000	0.531788	3.78134e-09
Os01g0680200	-0.51615	0.00513279
Os01g0681200	-1.04009	7.477e-31
Os01g0681700	-1.92731	0.00166286
Os01g0681900	1.02397	5.30368e-20
Os01g0685900	-0.511307	2.56773e-09
Os01g0686300	-5.24515	2.62049e-05
Os01g0687300	-0.793429	4.59271e-68
Os01g0689451	1.0052	1.19282e-64
Os01g0689900	0.605391	5.61959e-25
Os01g0692000	1.40637	0.000371708
Os01g0692100	1.57488	0.00253633
Os01g0692700	-0.646553	1.30459e-08
Os01g0693300	0.615147	1.7609e-16
Os01g0693800	0.941995	3.45222e-28
Os01g0694100	0.89564	6.24069e-17
Os01g0695300	0.942398	0.00200857
Os01g0695700	1.39328	2.56701e-71
Os01g0695800	2.64459	4.00803e-24
Os01g0698900	-1.89709	0.0367039
Os01g0700900	-2.83363	3.10594e-18
Os01g0701400	-2.06888	0.00390568
Os01g0704100	-1.77733	0.000412386
Os01g0704300	-0.910874	0.000192108
Os01g0705200	1.53022	0.0142439
Os01g0705300	1.21671	5.67381e-09
Os01g0706100	0.751853	0.000710065
Os01g0706600	-0.939688	0.0354825
Os01g0706850	-1.80428	5.02303e-06
Os01g0707500	1.28551	0.0354441
Os01g0708900	-0.521372	1.17358e-06
Os01g0709400	-0.554456	6.09178e-09
Os01g0710700	-1.72624	8.84906e-25
Os01g0712501	0.865872	0.00803888
Os01g0713200	1.40098	3.34507e-162
Os01g0714600	0.613965	1.23426e-06
Os01g0716200	-1.03052	1.4884e-68
Os01g0716450	3.64599	0.0226722
Os01g0716500	2.69447	6.06089e-80
Os01g0718000	-1.83378	0.020696
Os01g0719000	1.30439	8.70814e-06
Os01g0719300	1.06479	6.42792e-17
Os01g0719600	-0.517395	0.000113066
Os01g0719800	-2.94839	0.000950061
Os01g0719900	-3.96705	4.77873e-07
Os01g0720400	0.522983	0.00680354
Os01g0720500	-0.567015	3.66904e-11
Os01g0721000	0.719659	0.000284281
Os01g0723500	0.98572	0.0167512
Os01g0725400	-0.998551	2.55946e-18
Os01g0727800	-1.77186	1.33928e-08
Os01g0727820	-1.61358	0.0449174
Os01g0727840	-2.16003	7.0848e-06
Os01g0728300	0.830924	3.81196e-07
Os01g0729100	0.619232	0.000485878
Os01g0729900	-0.627533	1.0869e-34
Os01g0731100	1.95726	2.33527e-05
Os01g0733200	0.933193	2.19111e-11
Os01g0734000	0.636817	5.87183e-15
Os01g0734200	0.517085	1.01071e-19
Os01g0734800	0.940208	5.08511e-08
Os01g0735500	-1.36471	0.00770609
Os01g0736100	1.83442	1.5245e-05
Os01g0738300	-0.536693	2.83783e-05
Os01g0739300	-0.59752	0.00584669
Os01g0739500	-0.964338	5.78952e-44
Os01g0740300	-2.57025	3.09135e-30
Os01g0740350	-1.5145	0.0329151
Os01g0740700	2.11476	9.50708e-08
Os01g0740800	-5.55201	0.0012179
Os01g0741200	-0.952606	8.68214e-05
Os01g0741900	-0.609326	2.12842e-20
Os01g0742400	0.666241	0.0431654
Os01g0743100	-0.991892	0.0014768
Os01g0745300	-0.677478	0.00249996
Os01g0745700	-0.835827	0.00017576
Os01g0746700	0.641629	2.86383e-15
Os01g0748600	-1.36133	2.2435e-125
Os01g0748900	-0.628964	1.07305e-25
Os01g0748950	-4.24076	1.21162e-11
Os01g0749200	0.706193	6.91043e-06
Os01g0749400	-0.561549	3.02403e-29
Os01g0750500	-2.44521	5.44429e-99
Os01g0750600	-0.753301	3.23793e-16
Os01g0752500	1.25038	1.26513e-16
Os01g0755700	-1.00037	1.35285e-11
Os01g0756200	-1.74255	4.77094e-23
Os01g0756900	-0.586128	3.02627e-07
Os01g0757400	-1.08874	3.31662e-63
Os01g0758500	-0.759367	0.00898903
Os01g0759900	-0.582224	0.00239531
Os01g0760300	1.76187	0.00645197
Os01g0760600	0.598667	8.59082e-57
Os01g0761000	0.876102	0.00961624
Os01g0763000	0.520633	0.000110918
Os01g0763900	-0.750461	0.000850807
Os01g0765400	0.703359	0.0149375
Os01g0765500	-0.726814	0.00021098
Os01g0766900	-0.733612	1.8579e-07
Os01g0769700	-0.723034	1.02041e-29
Os01g0770700	-3.8595	5.93814e-147
Os01g0771100	0.627329	0.002028
Os01g0773000	0.712738	0.0427161
Os01g0773100	0.568955	6.80428e-24
Os01g0773400	-1.02817	1.21737e-10
Os01g0775200	-1.34757	3.9811e-179
Os01g0776500	0.961381	0.00277644
Os01g0778400	-1.51132	0.0299759
Os01g0778500	1.22579	5.18297e-06
Os01g0779400	0.562564	2.05404e-36
Os01g0780800	0.712331	4.34121e-13
Os01g0781100	-0.844759	1.04221e-30
Os01g0782200	-1.0778	1.82801e-38
Os01g0784200	1.07905	4.33446e-05
Os01g0786601	0.796305	0.00144802
Os01g0786700	0.576623	0.00021187
Os01g0787600	-0.504977	2.04669e-16
Os01g0788400	0.522874	0.0175726
Os01g0788950	0.614373	0.0008211
Os01g0794400	4.72099	8.70584e-06
Os01g0794800	-0.62447	4.18071e-16
Os01g0795100	-2.64463	0.00281535
Os01g0795400	2.22899	4.71555e-25
Os01g0795700	-0.646403	1.79956e-05
Os01g0799500	-1.39773	3.10403e-24
Os01g0802700	1.14335	4.47537e-07
Os01g0803300	1.85083	5.20554e-164
Os01g0803900	-2.15777	5.16055e-10
Os01g0804200	3.89775	0.0495533
Os01g0804400	1.30955	7.2254e-08
Os01g0805000	0.89548	0.0444372
Os01g0805900	-1.42672	3.77593e-265
Os01g0806200	0.676079	2.51689e-12
Os01g0810500	-1.61818	4.06116e-20
Os01g0810800	-4.81086	0
Os01g0812100	-1.8893	0.00657017
Os01g0812900	0.547533	3.51676e-12
Os01g0813800	-1.48501	0.000880326
Os01g0814100	-1.5579	0.0340976
Os01g0814200	-0.509347	0.00660861
Os01g0814400	-0.971698	7.29978e-79
Os01g0815400	-0.634273	4.91827e-11
Os01g0816100	0.778095	0.000386097
Os01g0817100	-0.57424	0.00604154
Os01g0817650	-1.08659	0.00136595
Os01g0818000	0.890622	6.58898e-119
Os01g0819100	-0.864109	1.65066e-09
Os01g0823100	0.816044	2.8406e-19
Os01g0823500	1.68594	5.34773e-06
Os01g0823900	-0.738731	1.48704e-14
Os01g0825800	0.639752	0.00451434
Os01g0826000	1.50166	2.84094e-07
Os01g0827700	-1.30937	0.0126853
Os01g0828300	-0.682791	0.000469655
Os01g0829000	1.0675	0.000891618
Os01g0830500	0.82753	3.47438e-20
Os01g0834900	0.753054	0.042328
Os01g0835700	0.751217	0.000942656
Os01g0837000	0.609157	3.15047e-13
Os01g0837800	0.658822	7.52655e-24
Os01g0838200	-0.66178	0.00551226
Os01g0838350	-1.08785	0.0209558
Os01g0838600	-2.37496	1.14619e-07
Os01g0839100	-0.816098	0.0427189
Os01g0839300	0.506628	0.000106682
Os01g0841700	-0.810016	0.000433977
Os01g0842400	-0.646822	0.00696273
Os01g0842500	-0.744683	1.08312e-15
Os01g0842600	0.549378	0.0029633
Os01g0847300	-0.513882	0.000222306
Os01g0847700	1.46418	5.60141e-55
Os01g0847800	0.988691	1.02291e-11
Os01g0848700	-1.1483	4.88089e-18
Os01g0849000	2.92332	9.45545e-78
Os01g0850700	-1.04003	6.32473e-31
Os01g0850800	-1.70252	6.86767e-20
Os01g0850900	0.802422	7.39567e-13
Os01g0851000	-0.660368	0.00549301
Os01g0851100	1.48447	2.23289e-50
Os01g0852100	-0.819211	5.28464e-07
Os01g0852400	0.657392	0.0482468
Os01g0853000	-0.665205	0.00100229
Os01g0853700	-0.923407	2.58849e-12
Os01g0854000	-1.3194	4.17471e-63
Os01g0854500	1.18255	0.00705665
Os01g0854800	0.802822	6.64865e-06
Os01g0855000	0.985929	2.52619e-23
Os01g0855200	2.74328	9.07799e-26
Os01g0855600	-1.82753	4.82456e-95
Os01g0857400	1.12213	4.13949e-30
Os01g0858350	0.556766	0.00623438
Os01g0859100	2.01744	0.000169708
Os01g0859300	1.61628	3.34242e-62
Os01g0859500	-0.701395	9.01065e-18
Os01g0860450	-1.33093	1.12325e-08
Os01g0860500	-0.908737	4.05514e-36
Os01g0860601	-2.30024	2.92518e-179
Os01g0860900	-1.75172	1.43719e-05
Os01g0861700	-1.10254	4.77829e-16
Os01g0861900	-1.2365	4.84566e-11
Os01g0862600	0.758802	0.0131572
Os01g0864000	-1.32928	0.0296461
Os01g0864500	0.591735	0.0264824
Os01g0864700	-0.72118	7.49371e-13
Os01g0866000	1.11749	2.75442e-14
Os01g0866100	-0.719987	2.65023e-16
Os01g0866133	-0.70169	3.48919e-57
Os01g0866400	1.57025	0.00696064
Os01g0868600	-3.08704	3.00643e-86
Os01g0868900	1.57782	0.000172367
Os01g0869800	1.95015	3.97987e-11
Os01g0871150	2.03655	0.0179172
Os01g0871500	0.845356	2.91363e-42
Os01g0871600	2.40521	4.55555e-17
Os01g0872566	0.814695	0.00128275
Os01g0872600	0.873057	0.000418037
Os01g0875300	0.712288	0.00128491
Os01g0875700	-0.798506	4.52648e-23
Os01g0876200	-2.47374	0.000327912
Os01g0878300	-1.70535	2.82307e-257
Os01g0878400	0.528512	0.00277644
Os01g0878700	0.818462	2.74898e-05
Os01g0879200	0.763443	0.0358137
Os01g0879500	0.620396	0.000296632
Os01g0881800	-1.76549	0.00130856
Os01g0882800	-1.34692	4.43423e-05
Os01g0885200	-0.530277	5.92474e-11
Os01g0887700	-0.581137	1.13524e-16
Os01g0892500	-1.57304	1.98084e-12
Os01g0892800	0.760748	5.04415e-05
Os01g0893400	-1.39721	1.24081e-21
Os01g0896400	-0.7936	0.00118744
Os01g0896500	0.652433	0.00868941
Os01g0899700	0.506628	2.1813e-07
Os01g0899800	0.664219	0.000776694
Os01g0900200	0.727548	7.23558e-08
Os01g0901600	1.00791	0.00527299
Os01g0901700	0.756349	4.42371e-09
Os01g0901800	-0.589062	8.00934e-08
Os01g0902100	-0.983514	0.00224533
Os01g0904700	0.611427	3.59967e-15
Os01g0905200	0.703266	0.000309992
Os01g0905300	0.75905	0.000197826
Os01g0905800	1.15062	0
Os01g0908200	-0.843154	1.05296e-71
Os01g0908301	-0.743827	0.00365244
Os01g0908600	1.0605	0.0363829
Os01g0909400	-1.49155	1.97205e-05
Os01g0910200	0.797782	0.0177357
Os01g0910500	-1.44354	6.23036e-11
Os01g0910900	-1.58949	0.000634801
Os01g0912850	-2.41808	0.0354441
Os01g0913300	1.24481	7.19774e-39
Os01g0915300	0.770853	3.47123e-09
Os01g0915400	1.16194	0.000196149
Os01g0915900	-1.05749	1.38096e-159
Os01g0916000	-1.25221	6.05598e-185
Os01g0916100	-2.03716	6.09876e-171
Os01g0916400	0.540953	1.06898e-31
Os01g0917500	0.593679	0.0250771
Os01g0917700	-0.653954	0.0443653
Os01g0917900	-0.874715	0.000146717
Os01g0919100	1.29579	0.0121268
Os01g0919400	0.90719	0.000321707
Os01g0919900	-0.806982	7.09976e-10
Os01g0922100	-1.07853	0.000726017
Os01g0923000	-0.541354	0.000316084
Os01g0924000	0.735754	9.19494e-05
Os01g0924400	-0.507576	3.88274e-06
Os01g0924800	0.508711	0.037445
Os01g0924933	0.636659	3.1795e-05
Os01g0925300	-0.762761	7.5257e-32
Os01g0925400	-0.675462	2.04294e-06
Os01g0925700	0.549686	7.32257e-05
Os01g0927500	1.07248	0.00033354
Os01g0929100	0.78761	0.0332262
Os01g0929200	-0.757524	1.3844e-16
Os01g0930800	1.46052	0.00247965
Os01g0931100	-0.915573	4.73735e-56
Os01g0931200	-0.591514	0.000600445
Os01g0932500	3.59026	0.0280496
Os01g0933200	0.735315	2.93986e-22
Os01g0933900	0.773341	0.00515611
Os01g0934700	0.696327	0.0156818
Os01g0934800	0.890789	8.47614e-06
Os01g0935600	0.949103	4.94259e-11
Os01g0935800	-2.04564	7.51055e-14
Os01g0936200	-0.77221	3.03715e-26
Os01g0937000	1.92012	1.48263e-11
Os01g0937012	3.37918	0.0154644
Os01g0937050	0.875049	1.3948e-06
Os01g0937100	0.820114	8.4069e-06
Os01g0937900	-1.66813	3.00269e-05
Os01g0938200	-0.762543	8.32209e-32
Os01g0939000	0.751617	0.0468388
Os01g0939600	-0.533617	7.96328e-05
Os01g0940100	-0.56342	1.04837e-06
Os01g0940700	3.14135	4.21401e-51
Os01g0941200	-3.32669	0
Os01g0942300	1.54405	7.53645e-05
Os01g0943000	0.563259	4.32527e-05
Os01g0943100	3.7005	0.00293128
Os01g0943900	0.563259	4.32527e-05
Os01g0944500	-5.13743	0.00110683
Os01g0945200	-0.969298	1.13995e-13
Os01g0945250	-0.838664	0.0191953
Os01g0946500	-1.93737	0.0297555
Os01g0946700	0.890527	1.58117e-81
Os01g0947000	0.980637	1.01123e-36
Os01g0947700	-0.593423	2.17311e-09
Os01g0948200	0.768426	0.000214901
Os01g0948600	0.912696	4.80768e-17
Os01g0949800	-1.15069	7.44515e-43
Os01g0949900	-0.502268	0.00199566
Os01g0950000	0.818075	0.0033446
Os01g0950300	0.645283	6.90966e-07
Os01g0950900	0.739199	3.77129e-05
Os01g0951500	-1.04605	1.2467e-05
Os01g0952500	-0.550632	1.19998e-10
Os01g0952800	1.08961	1.22512e-90
Os01g0953600	0.688021	5.19626e-31
Os01g0954000	0.854707	0.0138989
Os01g0955700	0.625726	1.91181e-13
Os01g0956200	0.834307	4.47797e-16
Os01g0956800	-0.785985	0.00854861
Os01g0957900	0.551152	4.85106e-09
Os01g0958200	0.544341	0.0177684
Os01g0958500	-0.745006	7.49026e-40
Os01g0959100	1.93767	9.60727e-08
Os01g0959200	1.94013	4.5338e-06
Os01g0959750	1.08373	0.000453012
Os01g0959900	1.93025	0.0417099
Os01g0960800	0.542	1.12763e-05
Os01g0960900	1.49234	0.00259443
Os01g0962700	-1.35227	1.36258e-56
Os01g0963000	1.32666	5.17651e-07
Os01g0964133	-0.525153	4.34987e-17
Os01g0965900	1.54726	6.0331e-22
Os01g0966300	0.754272	6.92126e-13
Os01g0966700	-1.25989	3.17235e-26
Os01g0967200	-1.66589	3.046e-05
Os01g0968300	0.91676	2.24351e-17
Os01g0968400	0.635105	2.12403e-09
Os01g0970900	0.539503	0.000122606
Os01g0971800	0.517355	1.09693e-06
Os01g0971900	0.575154	9.41779e-15
Os01g0972200	-1.93542	1.42229e-152
Os01g0972800	1.37667	0.000290361
Os01g0972900	-0.554298	0.00565784
Os01g0973400	0.642125	0.000686401
Os01g0974400	0.604873	0.00249783
Os01g0975000	1.06575	2.35902e-05
Os01g0975300	-1.70024	0
Os01g0975900	-2.69121	0
Os02g0102300	-1.49655	2.42067e-205
Os02g0103500	0.945359	0.00141036
Os02g0103900	0.552957	3.38496e-09
Os02g0105800	0.577362	0.0415709
Os02g0106100	-1.18809	2.84128e-29
Os02g0106600	-0.825682	0.00708424
Os02g0108302	-0.547804	0.0424081
Os02g0109200	-0.933919	0.00128762
Os02g0109800	-0.692742	6.72242e-39
Os02g0110600	0.544321	1.03853e-13
Os02g0111800	-0.904205	9.54462e-17
Os02g0112100	-9.49553	3.96735e-14
Os02g0112600	-4.02506	1.97659e-89
Os02g0114100	-2.65494	2.18471e-13
Os02g0114200	-0.683947	2.89338e-37
Os02g0114800	-1.42147	0.000329197
Os02g0115700	0.50376	3.5268e-49
Os02g0117700	-0.767097	0.000583556
Os02g0118850	-0.596741	0.00747617
Os02g0118900	-0.652124	0.0135517
Os02g0120100	0.893336	1.55186e-66
Os02g0120600	-2.65585	1.28707e-16
Os02g0120800	-0.985668	1.64911e-75
Os02g0121500	0.613105	6.71262e-05
Os02g0122100	0.902014	1.67901e-05
Os02g0122800	-0.671454	1.41674e-35
Os02g0123450	-0.619234	0.0286801
Os02g0123700	0.75882	0.00010849
Os02g0124600	-2.69826	0.00985016
Os02g0124650	-3.39981	1.1042e-06
Os02g0125200	-0.636573	6.99249e-07
Os02g0125400	-0.697628	0.00390568
Os02g0129700	0.51953	7.03537e-06
Os02g0129900	1.28141	0.00727851
Os02g0130100	1.1448	1.57065e-22
Os02g0131050	-1.5496	9.02921e-10
Os02g0131100	-1.58629	0
Os02g0131400	-1.44149	9.12704e-32
Os02g0132200	-0.511067	0.00379195
Os02g0132500	-0.659135	4.31626e-14
Os02g0134100	0.538054	0.00366032
Os02g0134400	1.10686	0.00109417
Os02g0136000	1.16123	1.87974e-18
Os02g0136850	0.622726	0.0183405
Os02g0136900	0.598468	6.3389e-06
Os02g0138000	-0.895094	4.40656e-06
Os02g0139400	-0.629464	1.25603e-17
Os02g0140200	0.684393	1.68183e-06
Os02g0141300	-0.738102	3.30362e-28
Os02g0143400	-2.02574	0.0102013
Os02g0148000	1.31169	4.07246e-05
Os02g0149700	-0.551781	0.0332579
Os02g0149800	-0.674961	5.50939e-18
Os02g0150700	-1.00492	2.55479e-61
Os02g0152400	0.718876	4.42898e-05
Os02g0152500	-0.609838	6.4709e-27
Os02g0152900	1.02151	0.00919188
Os02g0153300	0.684017	0.000434844
Os02g0153400	-0.806962	5.9541e-09
Os02g0155400	0.920736	0.0353039
Os02g0155600	-2.37655	1.0878e-09
Os02g0155700	2.19047	0.0089885
Os02g0156100	-0.51659	0.0232546
Os02g0156600	1.28414	0.0103822
Os02g0157300	0.834336	0.0302224
Os02g0157600	-0.533516	5.61394e-18
Os02g0158600	0.607257	0.000560982
Os02g0159200	-0.628745	3.55618e-20
Os02g0159700	0.861424	3.88371e-17
Os02g0161050	-1.45519	1.84992e-06
Os02g0161900	-0.575311	3.97178e-87
Os02g0164000	-0.608414	8.54314e-05
Os02g0164800	-0.890552	0.000200313
Os02g0166600	0.55859	7.02978e-13
Os02g0168300	-0.614507	0.0402878
Os02g0168400	-0.985578	2.36147e-15
Os02g0168600	-0.646427	7.64248e-08
Os02g0170100	-0.562855	2.65059e-42
Os02g0173200	0.700595	1.25692e-07
Os02g0174800	0.935661	6.11215e-46
Os02g0175400	-0.763347	7.21616e-42
Os02g0176100	-0.599713	2.9729e-23
Os02g0176300	-1.24972	4.16355e-17
Os02g0178100	1.34007	0.000569013
Os02g0178700	-0.829591	0.00197504
Os02g0178800	-1.47167	0.00211441
Os02g0179200	0.718263	1.07754e-05
Os02g0180400	-1.3313	0.002078
Os02g0181300	0.734729	1.65395e-12
Os02g0181900	0.740552	3.61761e-09
Os02g0182200	-4.44073	0.0409258
Os02g0182300	1.08193	3.02787e-11
Os02g0183900	1.66546	0.00870656
Os02g0184700	2.21859	3.97024e-06
Os02g0185200	1.71385	4.47369e-43
Os02g0186800	0.516694	0.00326685
Os02g0186900	0.663114	6.252e-18
Os02g0187700	-1.25458	3.11523e-06
Os02g0188000	1.11357	3.96121e-08
Os02g0191300	1.72357	3.39417e-162
Os02g0194900	-0.792972	8.17739e-06
Os02g0196700	-4.28546	0.0023929
Os02g0196800	0.525798	1.81887e-23
Os02g0198200	-0.916934	0.0182024
Os02g0198333	-2.84512	0.0134802
Os02g0198400	-0.688523	2.08603e-08
Os02g0198700	-2.11696	2.22918e-24
Os02g0199500	0.535211	6.19391e-07
Os02g0203000	0.555218	0.0419177
Os02g0204400	0.921963	5.57404e-08
Os02g0205200	-0.768618	0.000476385
Os02g0205500	-0.753924	7.59532e-13
Os02g0208675	-7.23055	1.3274e-07
Os02g0211000	0.758494	0.0365337
Os02g0211100	1.3566	0.038854
Os02g0211800	0.652778	6.31291e-05
Os02g0214900	1.63873	3.01056e-12
Os02g0215200	1.91963	7.67962e-107
Os02g0215500	0.931117	7.66363e-25
Os02g0215900	0.879375	1.38532e-05
Os02g0218800	-0.69812	3.70204e-22
Os02g0219200	0.675243	1.25039e-11
Os02g0220000	-2.19985	0.0006981
Os02g0224100	-1.0071	2.8712e-49
Os02g0225900	-1.37462	0.00902367
Os02g0226300	0.824527	2.75052e-10
Os02g0227100	-1.09932	3.55945e-19
Os02g0228300	0.6173	6.55522e-27
Os02g0231700	0.829077	0.00167588
Os02g0232000	-1.52811	6.36168e-22
Os02g0232400	0.506794	5.30468e-54
Os02g0232900	1.4467	8.63309e-06
Os02g0234700	-0.570022	0.0193321
Os02g0236600	-1.98748	4.40261e-144
Os02g0236800	-1.00338	2.51362e-17
Os02g0241100	0.574023	0.000175193
Os02g0241200	-0.805226	5.05591e-10
Os02g0244600	0.642958	2.70732e-25
Os02g0244700	0.974164	1.36134e-161
Os02g0247100	-2.25173	0.000367236
Os02g0252200	0.714279	0.00296285
Os02g0254700	0.674082	1.94329e-25
Os02g0256500	0.867247	0.0372378
Os02g0258200	-0.579052	6.23726e-06
Os02g0258250	-0.547168	0.0158176
Os02g0258800	1.18416	2.02435e-05
Os02g0259100	0.837117	2.7103e-79
Os02g0259600	0.5101	0.0144742
Os02g0264800	-1.39424	2.83417e-31
Os02g0265200	-0.516458	0.0182256
Os02g0266900	0.716275	0.0411962
Os02g0269200	-0.695243	0.00285272
Os02g0270200	-2.05111	0.000111009
Os02g0271000	-1.77753	0.000605442
Os02g0271600	-1.34205	7.69496e-06
Os02g0274900	1.23218	1.02711e-135
Os02g0276200	0.686144	5.80939e-36
Os02g0277700	0.974186	0.00297599
Os02g0278700	1.65081	0.00123418
Os02g0280200	-3.01375	2.69111e-11
Os02g0281200	0.68326	1.93337e-09
Os02g0285300	-3.27061	3.48905e-217
Os02g0285700	-2.20024	2.2889e-06
Os02g0285800	0.726913	1.53425e-08
Os02g0286850	-0.622205	0.00347666
Os02g0288400	-0.8514	0.0399567
Os02g0301800	-0.712692	7.39208e-19
Os02g0303000	-0.998379	0.0016816
Os02g0306401	1.70814	0
Os02g0311150	-1.62541	5.74386e-05
Os02g0312600	-0.904452	1.64275e-23
Os02g0313700	0.547885	1.07535e-13
Os02g0314300	-1.70758	1.39762e-07
Os02g0316200	-0.613519	0.000210017
Os02g0318100	0.762733	0.00157347
Os02g0319300	0.63415	1.78082e-09
Os02g0321600	-1.51627	0.00844683
Os02g0323600	1.48747	2.98382e-07
Os02g0324400	0.622817	0.000891618
Os02g0324700	0.560036	4.78812e-12
Os02g0325600	-0.762714	0.00167384
Os02g0331400	-3.20713	2.64228e-12
Os02g0332450	1.09823	2.19438e-08
Os02g0438601	-0.683303	0.0273594
Os02g0448400	-0.709613	6.77731e-42
Os02g0451900	0.567153	0.0474834
Os02g0454500	-0.980868	4.59881e-06
Os02g0458100	2.84794	8.37602e-45
Os02g0461100	0.662909	1.46004e-08
Os02g0462000	0.984282	2.17071e-08
Os02g0465900	-0.645811	1.65487e-73
Os02g0466400	1.15931	0.00203188
Os02g0473200	0.553728	9.76439e-18
Os02g0484200	4.97186	1.17842e-06
Os02g0484900	-1.92507	3.09962e-23
Os02g0484950	-1.7664	0.00950724
Os02g0489525	0.595378	0.000882942
Os02g0489550	0.734852	4.15711e-13
Os02g0491600	-4.40923	0.013758
Os02g0498100	-0.997928	0.00767972
Os02g0503100	-0.723477	0.0379168
Os02g0503700	-2.31864	0.0413569
Os02g0503900	-1.10254	7.5706e-12
Os02g0504700	-1.29281	1.96689e-05
Os02g0505500	1.14866	4.44264e-06
Os02g0508100	0.616517	5.98338e-08
Os02g0509600	-1.60689	0.000253107
Os02g0511800	0.99962	2.299e-08
Os02g0512000	-0.645439	4.80117e-47
Os02g0513800	-0.997253	0.0193545
Os02g0514326	-1.62223	0.00010572
Os02g0514500	-2.15412	3.08701e-76
Os02g0517700	0.791862	0.000201748
Os02g0519700	-0.546349	1.15048e-23
Os02g0520100	-0.824963	1.89521e-08
Os02g0522300	-0.981338	4.06948e-27
Os02g0524800	-1.04251	0.0198556
Os02g0525100	-0.935571	2.33273e-15
Os02g0525501	-5.87191	4.26576e-05
Os02g0525600	-0.660051	4.78972e-39
Os02g0526000	0.654362	4.24867e-09
Os02g0527200	-0.874652	2.8707e-05
Os02g0527700	-2.86005	0.0401094
Os02g0528100	-0.546513	0.00711673
Os02g0528500	0.869159	9.80318e-09
Os02g0529800	-1.30905	4.01269e-09
Os02g0530600	0.851121	0.000706014
Os02g0531200	0.574358	0.0222677
Os02g0532500	0.511076	0.00125301
Os02g0533700	-1.57452	3.99211e-05
Os02g0533800	-2.07667	1.01123e-94
Os02g0534400	0.532809	1.96385e-14
Os02g0535901	-1.04172	0.000907141
Os02g0538000	0.535261	0.000280098
Os02g0539500	-0.653042	0.0131006
Os02g0542500	-1.45457	1.07466e-41
Os02g0550800	-2.05234	8.67837e-09
Os02g0551100	0.770473	5.08312e-17
Os02g0551700	-0.658001	5.87079e-08
Os02g0553200	1.25846	3.42498e-06
Os02g0555100	0.737222	0.00011279
Os02g0555600	-0.808374	0.00026445
Os02g0555700	-0.538936	1.06202e-09
Os02g0555832	0.537472	9.35658e-07
Os02g0556000	0.792371	3.49965e-07
Os02g0556100	0.610621	1.44111e-20
Os02g0559300	-1.54835	0.00515393
Os02g0559800	2.66448	9.50948e-06
Os02g0560200	2.66448	9.50948e-06
Os02g0560600	2.66448	9.50948e-06
Os02g0561000	2.66448	9.50948e-06
Os02g0561400	2.66448	9.50948e-06
Os02g0561800	2.66448	9.50948e-06
Os02g0564600	1.63694	0.0184646
Os02g0564700	-1.11852	3.05719e-11
Os02g0565600	0.850617	1.74281e-05
Os02g0566300	-0.820129	3.7558e-22
Os02g0567800	1.99993	5.29545e-10
Os02g0569400	0.895421	0.00397226
Os02g0569900	3.19885	7.26342e-08
Os02g0570400	0.902331	0.0330647
Os02g0572600	-0.756865	3.79076e-39
Os02g0573500	-1.56894	2.89496e-41
Os02g0574000	-0.649499	0.0181948
Os02g0574500	-0.689366	0.00219907
Os02g0574600	-0.938079	2.07356e-17
Os02g0575000	-0.865354	1.69961e-20
Os02g0575500	1.05151	0.000583556
Os02g0575800	1.21702	0.00413488
Os02g0577700	2.00217	0.0217135
Os02g0580300	-0.641196	5.96596e-50
Os02g0581900	-0.561348	0.0283761
Os02g0582100	-0.926458	6.1528e-09
Os02g0582600	-1.87272	5.68423e-101
Os02g0582800	-0.951684	1.95481e-09
Os02g0582900	-3.7823	0
Os02g0583700	1.03109	3.22072e-09
Os02g0583900	-1.51163	0.00976175
Os02g0584200	-3.69913	3.82752e-18
Os02g0584700	0.848215	0.000160904
Os02g0585650	2.29041	0.0124308
Os02g0586900	0.787695	0.000306085
Os02g0587800	-2.33827	0.00102644
Os02g0590400	0.829482	4.98031e-07
Os02g0593500	1.62656	0.0341027
Os02g0594166	2.08082	6.85666e-56
Os02g0594232	1.36773	2.90816e-08
Os02g0594651	-0.665801	0.0107729
Os02g0595900	-2.53397	3.95265e-207
Os02g0600200	0.870204	0.000337926
Os02g0601300	1.31247	0
Os02g0601700	-0.576535	9.72102e-07
Os02g0602000	0.842474	0.0171588
Os02g0602800	-0.564164	2.42453e-06
Os02g0602900	-1.31917	3.40349e-22
Os02g0605500	-0.54889	0.00506679
Os02g0606200	-0.976724	0.0276445
Os02g0606900	0.618868	0.00905305
Os02g0611200	0.610737	5.30629e-60
Os02g0612900	1.53949	0.00137037
Os02g0614200	1.07631	7.63896e-13
Os02g0616600	0.710577	0.00134401
Os02g0617300	-0.728198	4.21577e-53
Os02g0617700	0.564804	0.000502875
Os02g0618400	2.17808	0.000292879
Os02g0620600	3.00319	0
Os02g0621300	6.2902	6.42911e-06
Os02g0625000	-0.56438	5.35889e-19
Os02g0625300	-1.04334	4.28475e-05
Os02g0628200	-0.768936	7.55049e-23
Os02g0629200	-1.21448	1.00988e-186
Os02g0629800	-1.56198	1.13056e-30
Os02g0633200	0.509745	0.00134401
Os02g0633300	-0.873587	4.01339e-10
Os02g0634700	0.583444	3.10017e-11
Os02g0635200	0.721535	1.58814e-11
Os02g0636600	-2.84085	0.010701
Os02g0638200	-1.20825	0.0127383
Os02g0638650	-2.12853	4.3385e-16
Os02g0639600	-0.868302	3.96604e-13
Os02g0639800	-1.04842	2.0777e-21
Os02g0641300	0.660721	2.39495e-07
Os02g0643500	1.22894	2.6965e-06
Os02g0643800	-0.619854	0.0454524
Os02g0644000	0.733831	4.31626e-14
Os02g0646200	-1.37734	0.00143589
Os02g0648300	-0.863485	0.0106974
Os02g0649900	1.32439	8.41196e-05
Os02g0650300	0.772706	5.85688e-48
Os02g0653000	-1.06146	6.81129e-06
Os02g0653200	-0.595367	2.2229e-10
Os02g0653400	-0.751965	0.00128333
Os02g0654700	0.781198	1.14533e-06
Os02g0655600	-0.523788	7.68248e-06
Os02g0656200	0.554202	6.35075e-09
Os02g0656600	1.56147	0.0335269
Os02g0658100	-1.96047	1.93435e-225
Os02g0661900	-1.19139	8.52121e-22
Os02g0662000	-1.13113	1.76538e-275
Os02g0663200	0.935391	0.00651346
Os02g0663300	0.513411	0.0148528
Os02g0664000	0.576773	1.0925e-21
Os02g0665500	-0.667092	0.000258576
Os02g0665800	-1.79876	8.33025e-63
Os02g0666200	-1.1552	5.0828e-221
Os02g0667300	-0.736066	0.0159501
Os02g0668000	0.74875	6.12019e-07
Os02g0668500	-1.20806	7.37457e-16
Os02g0669000	-0.506194	1.56303e-07
Os02g0669100	-1.64184	6.13989e-303
Os02g0669900	-0.730623	0.0183094
Os02g0671100	-0.729693	8.74276e-05
Os02g0673100	0.56907	2.20337e-07
Os02g0675700	-0.782814	2.94172e-05
Os02g0675800	0.76462	6.37347e-13
Os02g0676800	-2.15664	4.88122e-05
Os02g0680600	0.77904	7.38596e-06
Os02g0681000	0.620955	3.26715e-05
Os02g0681200	0.692255	0.000112438
Os02g0681900	-0.605043	0.00295398
Os02g0683900	1.00346	9.75976e-42
Os02g0684400	-1.44417	5.45875e-08
Os02g0684500	-0.588242	0.0386791
Os02g0686500	-0.810632	0.0217237
Os02g0686700	1.13797	3.33159e-05
Os02g0686800	1.49199	0.00126957
Os02g0689200	0.812148	1.72876e-15
Os02g0689900	-1.7776	1.20107e-75
Os02g0690000	-1.2143	0.00183752
Os02g0690500	0.500884	4.29748e-08
Os02g0691500	1.05853	0.0443562
Os02g0693500	-0.97454	1.31152e-13
Os02g0695200	0.885178	0.00388621
Os02g0695600	-0.587758	0.00151639
Os02g0697600	0.514949	1.10664e-06
Os02g0698000	1.04167	4.69604e-08
Os02g0699400	-0.53645	1.98014e-10
Os02g0701600	0.626982	2.87534e-09
Os02g0702000	0.529176	0.0166309
Os02g0703600	-0.620872	6.73406e-11
Os02g0704900	0.650699	1.45235e-08
Os02g0705500	-0.593492	0.0143586
Os02g0706400	0.575618	0.00105043
Os02g0706900	-0.7788	1.88223e-17
Os02g0707900	1.05368	9.57921e-17
Os02g0708100	0.582684	1.60982e-37
Os02g0708400	-0.747138	4.74622e-71
Os02g0710300	-0.659492	0.0440538
Os02g0711400	-0.540872	0.0324188
Os02g0712500	1.17775	4.08608e-64
Os02g0712600	-0.756444	7.8853e-08
Os02g0714200	-0.876533	2.11094e-69
Os02g0714300	1.67232	1.0334e-05
Os02g0714600	1.16926	3.26699e-97
Os02g0718100	-1.8494	2.41107e-105
Os02g0719000	-0.567474	0.000657507
Os02g0719800	-0.663347	5.49192e-39
Os02g0720450	0.815676	0.00703538
Os02g0720500	0.76405	0.012619
Os02g0720900	-1.21214	7.63e-94
Os02g0723200	1.00419	2.67671e-05
Os02g0723400	1.18255	0.0456622
Os02g0725200	0.886569	0.00167327
Os02g0726300	-0.85185	1.03818e-06
Os02g0726700	-1.34252	5.38856e-07
Os02g0727300	0.682567	5.61918e-25
Os02g0729200	-1.12427	0.0203373
Os02g0730300	-0.502006	1.75736e-12
Os02g0730500	0.51572	0.000110878
Os02g0731200	1.23369	1.61001e-11
Os02g0731300	0.845515	6.33762e-13
Os02g0731500	-1.3933	0.0041323
Os02g0731900	1.29603	6.57915e-13
Os02g0732200	-0.508319	1.1645e-09
Os02g0732250	-1.01535	9.15686e-05
Os02g0732800	0.77953	2.69321e-10
Os02g0734600	-0.59958	2.94303e-25
Os02g0735200	-1.33831	3.73289e-289
Os02g0736400	-0.688777	1.44885e-50
Os02g0736900	-2.63229	1.94665e-08
Os02g0739100	-0.568432	3.83836e-09
Os02g0739400	-0.664544	8.92491e-15
Os02g0739700	-0.561114	0.000737568
Os02g0740400	1.089	0.000395421
Os02g0740500	1.04848	1.06286e-16
Os02g0744000	1.46464	0.0419921
Os02g0744200	1.34031	7.89229e-19
Os02g0744900	0.955356	2.73685e-06
Os02g0745100	-1.24652	0
Os02g0747400	-0.56226	0.0431447
Os02g0748300	0.841716	3.22325e-54
Os02g0749800	4.4445	0.0406506
Os02g0750400	0.853378	0.0258619
Os02g0751600	1.54001	0.0306509
Os02g0751900	3.11487	0.0310341
Os02g0752800	-0.507095	6.35152e-17
Os02g0753000	0.681716	0.000116528
Os02g0753400	-0.901039	1.80031e-08
Os02g0753500	-0.628866	0.0341081
Os02g0753800	0.91268	6.15124e-87
Os02g0755400	-0.952251	2.57062e-26
Os02g0755600	-0.516324	0.0174441
Os02g0755900	2.08634	3.72962e-61
Os02g0756800	1.26626	1.26904e-65
Os02g0757100	-1.26122	7.09483e-19
Os02g0759900	0.767786	0.030973
Os02g0760500	-0.645687	6.56217e-11
Os02g0761000	-0.555775	0.000504893
Os02g0762600	-1.41127	8.35912e-103
Os02g0763000	-0.792564	4.4871e-28
Os02g0763900	-0.528119	3.33233e-11
Os02g0764200	0.554926	0.0313489
Os02g0764700	1.56152	0.024559
Os02g0766600	-0.934337	9.67496e-43
Os02g0767200	-1.54093	2.74242e-18
Os02g0767300	-1.15114	0.0254837
Os02g0769700	-1.10181	0.00628239
Os02g0769800	-0.537319	0.00133385
Os02g0770500	-1.08792	8.33489e-12
Os02g0771400	0.994109	0.00184885
Os02g0771600	-1.21111	4.49818e-05
Os02g0773200	-0.899487	3.29109e-05
Os02g0773732	0.621875	9.08077e-05
Os02g0773800	0.747305	0.0217036
Os02g0776400	-0.530374	0.00106121
Os02g0782900	-0.516781	1.03011e-11
Os02g0786500	-0.751398	0.0326092
Os02g0786900	0.871744	0.0299239
Os02g0787300	-0.533186	0.000291973
Os02g0787600	-0.836608	1.6065e-07
Os02g0788500	0.763371	0.0221413
Os02g0788800	2.13576	0
Os02g0790500	-1.13508	3.68274e-49
Os02g0790600	-0.557357	0.0296956
Os02g0791300	2.11774	1.33929e-09
Os02g0791400	-1.02361	6.04211e-12
Os02g0791700	1.48503	3.81131e-06
Os02g0792100	0.528333	1.80163e-05
Os02g0793900	-0.533331	2.17743e-08
Os02g0794400	0.644903	0.00636596
Os02g0799700	-0.958249	0.000309738
Os02g0802500	1.33494	1.24592e-223
Os02g0802700	-0.750035	8.94358e-31
Os02g0803400	-0.59135	2.86332e-11
Os02g0806300	-0.846713	0.0189189
Os02g0807000	0.62616	1.62448e-21
Os02g0807100	0.923637	5.39817e-09
Os02g0807200	1.44217	0.00123419
Os02g0807750	0.534702	0.00262988
Os02g0807800	-1.63526	1.05679e-65
Os02g0808800	3.3344	2.14208e-07
Os02g0810200	-0.513478	9.58106e-06
Os02g0810500	-0.970496	7.3155e-09
Os02g0810900	-1.20566	5.23478e-21
Os02g0811800	3.10705	0
Os02g0812500	0.668898	0.0327392
Os02g0812600	-2.74316	0.00429999
Os02g0813350	0.820897	3.02574e-34
Os02g0815600	0.638507	0.000865058
Os02g0817500	-0.808201	6.31054e-29
Os02g0818000	-2.29685	4.73784e-52
Os02g0818500	-1.19886	2.6548e-05
Os02g0819450	-5.45166	0.0019813
Os02g0820300	0.531702	0.00982282
Os02g0820900	-0.571615	2.24302e-11
Os02g0821400	-0.73449	2.05376e-05
Os02g0822050	-0.534889	0.0290952
Os02g0822100	-0.64203	1.8997e-22
Os02g0822500	-1.10115	6.72256e-204
Os02g0822900	1.42475	9.53718e-21
Os02g0823100	0.501087	2.68147e-30
Os02g0825700	0.774311	0.000199281
Os02g0828100	1.11853	0.0136866
Os02g0828200	1.70787	0.0153794
Os02g0828400	-0.759679	0.00267468
Os02g0828566	-0.662442	1.95313e-09
Os02g0828600	-0.619393	1.67251e-07
Os02g0829500	0.530757	4.21205e-12
Os02g0832000	-1.05779	0.0155517
Os02g0833900	-1.59062	1.66606e-15
Os03g0100800	-0.652152	0.00929595
Os03g0101400	-1.15596	0.00157957
Os03g0103100	-0.910188	7.73425e-95
Os03g0103200	-0.730269	9.02316e-56
Os03g0103300	0.885913	2.1495e-05
Os03g0103400	0.93984	0.00613689
Os03g0106000	0.621265	0.000833512
Os03g0106200	-0.697585	2.54238e-15
Os03g0107300	-0.612659	6.67582e-57
Os03g0107500	1.90806	0.0321469
Os03g0108000	0.590232	0.000342441
Os03g0108800	-0.662921	0.00111863
Os03g0109300	-1.97979	1.34036e-13
Os03g0110600	0.545514	0.0245794
Os03g0111200	-2.32344	6.84545e-226
Os03g0113500	-1.56857	1.56926e-36
Os03g0113700	0.680158	4.96339e-29
Os03g0114300	-0.593964	1.63963e-17
Os03g0114400	-0.674721	0.0322992
Os03g0114800	0.568223	3.49633e-22
Os03g0115000	-0.821506	2.37556e-05
Os03g0115200	0.584301	3.84015e-24
Os03g0115300	0.818278	0.0431654
Os03g0116400	-1.01477	3.53083e-67
Os03g0116850	0.577093	0.0148125
Os03g0118600	2.36595	0.0216733
Os03g0119300	0.576838	5.32155e-09
Os03g0119900	-0.665537	3.65095e-08
Os03g0121700	0.755174	0.008372
Os03g0122000	-0.696737	1.38192e-08
Os03g0122200	1.20122	5.29103e-05
Os03g0123500	-1.01147	2.80724e-17
Os03g0124500	-0.680965	0.00321465
Os03g0124900	-0.627897	0.00224533
Os03g0125000	0.526453	0.00517811
Os03g0125100	-0.68761	1.99883e-05
Os03g0125300	0.620717	4.65577e-60
Os03g0126300	1.64919	4.6367e-06
Os03g0126600	0.752323	0.000980564
Os03g0126700	0.670732	2.05432e-08
Os03g0126800	0.575344	2.71041e-17
Os03g0126900	1.23529	1.7902e-07
Os03g0128100	-0.534968	8.56627e-30
Os03g0128300	-0.947782	4.33858e-07
Os03g0129300	2.0401	3.72037e-42
Os03g0129800	-1.23173	0.0134782
Os03g0130700	-0.807531	8.5905e-11
Os03g0130750	0.830244	0.00899346
Os03g0132200	-0.848623	1.04282e-17
Os03g0132900	1.01303	3.0463e-06
Os03g0133825	-0.619585	0.0277548
Os03g0134300	0.592803	2.14919e-18
Os03g0135200	-0.519146	0.000706178
Os03g0135700	-1.33785	2.56915e-46
Os03g0136200	-0.856903	5.74365e-35
Os03g0136900	0.531579	7.57611e-32
Os03g0137200	-1.1853	2.37416e-133
Os03g0138000	-0.59534	1.48827e-06
Os03g0138500	-0.632041	2.56873e-05
Os03g0140300	-3.26607	0.0028631
Os03g0140500	-0.648789	0.00511501
Os03g0141700	0.53487	0.000374278
Os03g0142500	-0.827989	6.98081e-07
Os03g0143200	-1.78955	0.00138633
Os03g0143400	0.577417	6.13343e-22
Os03g0144500	0.550311	0.0297732
Os03g0145050	-2.05751	2.65891e-95
Os03g0146100	-0.707407	4.45411e-90
Os03g0148700	-0.832284	1.13214e-12
Os03g0149100	1.69324	4.35279e-05
Os03g0149200	-0.673775	4.96426e-23
Os03g0150600	-0.898315	3.11856e-38
Os03g0150800	-2.37222	8.63339e-46
Os03g0154000	2.34127	7.9137e-100
Os03g0155900	-1.84416	4.43707e-32
Os03g0156000	-2.31197	2.88421e-06
Os03g0156300	-4.75835	0.0179041
Os03g0157400	0.700732	0.049527
Os03g0157900	0.50421	1.79438e-19
Os03g0158800	0.944693	0.00230204
Os03g0159100	0.566571	5.271e-14
Os03g0159900	-0.644129	0.00504233
Os03g0161100	-0.657071	1.85023e-13
Os03g0161200	1.29724	1.94643e-09
Os03g0161800	0.969852	1.52164e-98
Os03g0162000	0.560712	0.00856706
Os03g0162200	-0.548232	8.40901e-07
Os03g0162800	4.5417	0.00848783
Os03g0163000	0.721573	0.00343554
Os03g0163200	-1.04793	2.83308e-09
Os03g0168000	-0.835086	1.42851e-05
Os03g0169100	0.545508	2.35668e-13
Os03g0169500	-1.07134	1.11431e-22
Os03g0169600	-0.771556	3.02203e-08
Os03g0169900	-0.842905	0.000224287
Os03g0170100	-0.766884	0.0218713
Os03g0170500	2.04129	0.031961
Os03g0170900	2.71474	1.06097e-23
Os03g0171300	-2.31863	3.79882e-21
Os03g0171900	-0.7737	2.05009e-17
Os03g0174200	-0.592054	7.6654e-05
Os03g0174500	0.604487	1.88974e-27
Os03g0177000	-0.562874	1.00558e-05
Os03g0178066	-0.502303	0.00031141
Os03g0179900	0.505983	4.57147e-08
Os03g0180900	1.66778	1.84396e-64
Os03g0181800	-0.634385	4.19707e-11
Os03g0183200	-1.32558	3.21523e-31
Os03g0183300	-0.884773	3.24072e-46
Os03g0183500	1.3185	3.79867e-12
Os03g0183600	5.44505	0
Os03g0184550	-2.06537	3.16948e-25
Os03g0186900	0.540466	1.99333e-07
Os03g0187600	0.517525	6.88789e-08
Os03g0188100	1.68045	0.000152655
Os03g0188200	-1.0116	0.000208589
Os03g0188500	-0.941379	5.19768e-12
Os03g0188900	0.584896	3.19694e-10
Os03g0190400	0.616118	7.44598e-09
Os03g0191900	-0.806413	3.46491e-05
Os03g0192500	-0.899108	3.88654e-63
Os03g0194100	0.555934	1.75277e-13
Os03g0195100	1.7699	6.77804e-41
Os03g0195450	-0.542489	0.022174
Os03g0195800	-0.748725	7.01542e-05
Os03g0196000	-2.31209	1.14926e-187
Os03g0196400	0.610089	0.0477314
Os03g0196600	1.04295	0.000106132
Os03g0197100	6.05771	1.63684e-60
Os03g0197200	1.8743	0.00284585
Os03g0197850	1.25274	1.36261e-06
Os03g0198600	1.02299	2.76755e-11
Os03g0199100	0.646176	1.21962e-10
Os03g0200200	2.67082	9.27365e-24
Os03g0201000	1.21886	0.0258004
Os03g0205700	-0.521292	2.35709e-11
Os03g0206400	-0.72528	0.0283905
Os03g0206700	-1.33022	5.61708e-06
Os03g0209800	-0.864914	0.00030535
Os03g0210500	-1.10245	3.44903e-06
Os03g0211500	0.56918	0.047398
Os03g0212600	-0.611938	0.0004034
Os03g0212800	-1.18274	3.77536e-60
Os03g0214200	-0.908278	2.26198e-24
Os03g0214400	-0.681415	1.7017e-09
Os03g0215700	0.508091	4.35037e-09
Os03g0216300	0.517803	0.0392845
Os03g0216700	0.529126	1.43883e-21
Os03g0217900	-0.636342	0.022015
Os03g0218200	0.786536	0.0289611
Os03g0218400	0.871354	3.98647e-27
Os03g0218500	0.550387	0.00128785
Os03g0219100	0.800718	4.82144e-06
Os03g0219900	1.08705	0.000158976
Os03g0221200	0.695131	7.20985e-07
Os03g0221500	-0.716419	4.42506e-07
Os03g0221700	-0.833987	2.45677e-05
Os03g0223000	-0.695793	5.80354e-37
Os03g0223301	-0.980664	7.32606e-05
Os03g0223400	2.2358	0
Os03g0225900	0.782151	0.0417017
Os03g0226200	0.521365	8.34094e-16
Os03g0226400	0.764789	7.80299e-18
Os03g0227400	0.848516	6.75486e-11
Os03g0231150	-0.656167	0.000201648
Os03g0231600	1.29411	2.33979e-33
Os03g0231700	-1.50329	6.00414e-56
Os03g0232400	-2.01171	4.18597e-05
Os03g0232800	1.545	5.47648e-05
Os03g0234000	-5.62311	0.000169817
Os03g0234100	-4.77678	1.55157e-16
Os03g0234900	-2.56977	6.35284e-34
Os03g0236200	0.833635	8.78258e-72
Os03g0237100	1.37074	4.10574e-103
Os03g0237201	1.35766	0.0427881
Os03g0237600	-0.710551	1.77597e-41
Os03g0239300	-0.575461	0.00106453
Os03g0242300	-0.597897	3.08313e-19
Os03g0242900	0.510476	0.0137647
Os03g0243100	0.905392	1.25398e-74
Os03g0243700	2.87317	6.90814e-38
Os03g0244000	1.24644	0.00858077
Os03g0244200	1.14125	4.12438e-52
Os03g0248000	-0.528483	4.81887e-16
Os03g0248200	1.2838	0.000786152
Os03g0250000	-1.59987	4.32186e-70
Os03g0250200	-1.38695	5.01123e-50
Os03g0251800	-0.700589	3.09647e-11
Os03g0253600	-0.66737	7.12268e-18
Os03g0255100	-0.854588	2.94435e-35
Os03g0255400	-0.841877	1.25735e-43
Os03g0255500	1.33945	1.45049e-284
Os03g0256800	-1.07527	0.00210591
Os03g0257600	-2.07401	4.72553e-53
Os03g0257700	-2.24522	0.0320782
Os03g0258900	-1.2402	0.000153455
Os03g0259500	2.50955	0.000289837
Os03g0259900	-0.538929	2.11656e-13
Os03g0261100	0.804446	5.1224e-06
Os03g0262700	0.542273	4.45486e-05
Os03g0263900	-0.703139	1.26634e-18
Os03g0264300	-0.634564	0.0036152
Os03g0264400	0.626292	2.28992e-21
Os03g0264600	-1.17626	0.000568918
Os03g0265400	0.866611	0.00641334
Os03g0265900	0.611978	1.8574e-13
Os03g0268400	-0.538536	3.23689e-22
Os03g0268600	1.16609	0.0115409
Os03g0269900	1.00826	3.22309e-07
Os03g0273800	0.779339	1.81594e-114
Os03g0275900	-0.575346	5.86404e-13
Os03g0276500	0.566603	1.29172e-48
Os03g0276900	-0.593214	1.39966e-08
Os03g0277300	1.61847	2.24329e-05
Os03g0277700	1.18138	2.00748e-28
Os03g0278000	-0.505921	1.23677e-43
Os03g0278900	1.19853	0.000507034
Os03g0279200	-0.599235	1.18636e-23
Os03g0279700	-3.70494	2.27968e-15
Os03g0280800	-0.933254	0.00572213
Os03g0281500	0.58721	0.00560134
Os03g0283200	2.35286	6.49029e-33
Os03g0284400	0.70755	0.0295058
Os03g0286200	1.12476	3.41942e-30
Os03g0286500	-1.84643	1.15635e-53
Os03g0286900	1.1572	7.56934e-10
Os03g0287400	1.89452	0.0437167
Os03g0288400	0.554956	1.33076e-09
Os03g0288900	-0.52561	0.00145568
Os03g0290900	-1.29441	6.2426e-10
Os03g0291200	-2.06956	1.13986e-12
Os03g0291500	4.11794	0
Os03g0292200	0.591651	3.60735e-05
Os03g0293100	1.09415	0.0157254
Os03g0294032	1.2907	0.000117401
Os03g0294100	1.28914	1.35785e-11
Os03g0296800	0.627508	7.37519e-10
Os03g0297600	-1.25132	2.06322e-29
Os03g0297800	-1.12741	6.15355e-10
Os03g0298900	-0.660018	0.0175525
Os03g0299200	-1.46495	2.04085e-20
Os03g0302900	-0.586358	1.34818e-09
Os03g0304500	-1.26994	1.9501e-16
Os03g0304800	0.773927	0.0344326
Os03g0305800	-1.04057	4.42638e-09
Os03g0305950	-2.36836	0.041175
Os03g0306900	0.703245	2.59131e-07
Os03g0307200	2.80769	0
Os03g0307300	2.27574	0
Os03g0308800	1.27817	2.53676e-10
Os03g0310600	-1.57999	0.00353763
Os03g0312100	-4.35151	0.0141851
Os03g0314400	0.933657	0.00683759
Os03g0314500	-1.45119	2.08743e-75
Os03g0314800	0.595959	5.86554e-12
Os03g0315400	1.57508	7.21987e-14
Os03g0316200	-1.3531	3.32357e-41
Os03g0319300	-0.504237	2.47745e-29
Os03g0319400	-1.77239	1.44055e-37
Os03g0320100	-0.973358	7.22895e-125
Os03g0320600	-0.636229	0.0237094
Os03g0321300	-1.08321	1.12977e-11
Os03g0325500	0.557733	1.02138e-06
Os03g0325600	0.982874	1.72147e-06
Os03g0326200	-0.599165	0.0139256
Os03g0327100	-0.652764	2.99574e-16
Os03g0327600	1.77002	0
Os03g0328100	-0.636146	0.0412341
Os03g0331600	0.638969	0.00213107
Os03g0332400	0.750445	3.80931e-34
Os03g0332533	-2.16345	4.92131e-84
Os03g0333400	1.21891	0.0176494
Os03g0336200	-1.00172	6.55571e-13
Os03g0338400	-0.735414	1.02818e-10
Os03g0339900	-1.9589	0
Os03g0340500	1.13322	1.61524e-50
Os03g0341000	1.02283	0.0140294
Os03g0342900	-0.882287	5.3557e-57
Os03g0347500	4.65337	3.02183e-105
Os03g0347700	-0.565062	0.00092575
Os03g0347900	-2.99832	4.35677e-22
Os03g0351300	-1.16409	1.76652e-08
Os03g0351400	-0.554547	1.82419e-06
Os03g0351800	-0.706531	2.46967e-16
Os03g0355700	-0.733634	0.0220334
Os03g0356300	1.2703	1.82419e-07
Os03g0356700	-0.560297	5.01078e-41
Os03g0358200	0.688772	0.0313089
Os03g0359000	-0.508504	5.957e-14
Os03g0360300	1.22664	1.62524e-12
Os03g0363100	-1.27803	1.74258e-05
Os03g0365800	-2.82858	0
Os03g0365850	-0.968686	8.92238e-08
Os03g0365900	-1.09374	3.11163e-36
Os03g0367101	-0.804085	4.36628e-10
Os03g0367150	-0.804154	5.41458e-12
Os03g0367200	-0.813416	0.0247787
Os03g0368000	-1.40463	2.33778e-31
Os03g0368300	-0.840942	1.07468e-16
Os03g0368900	-0.908484	5.44941e-94
Os03g0370000	0.547594	9.82668e-12
Os03g0376100	0.879706	7.66228e-92
Os03g0376600	0.802055	2.9476e-07
Os03g0377700	0.538149	0.000118333
Os03g0379300	1.47012	5.3595e-50
Os03g0379500	0.842502	1.40051e-10
Os03g0385400	-0.986721	1.4796e-15
Os03g0386000	-1.73324	0
Os03g0386500	1.17169	7.56658e-21
Os03g0386700	1.30172	0.0233748
Os03g0387900	-0.620596	8.62059e-33
Os03g0389700	0.842097	7.03843e-105
Os03g0391300	0.666132	0.0393523
Os03g0392600	0.907261	4.03872e-13
Os03g0393700	0.664857	1.54786e-17
Os03g0395100	-0.689667	8.33514e-05
Os03g0397700	0.510799	5.512e-17
Os03g0398250	-1.1861	0.0425383
Os03g0398600	-0.957448	0.00109486
Os03g0399532	0.841695	8.1046e-19
Os03g0401300	0.633375	6.9651e-75
Os03g0403100	0.524618	1.40133e-11
Os03g0404800	2.42265	0.00189524
Os03g0405200	-0.722461	0.00082902
Os03g0405400	-0.951057	0.000514818
Os03g0405500	-0.717711	2.99415e-59
Os03g0406250	0.655061	0.0317681
Os03g0407100	-0.661949	0.00180544
Os03g0409100	-1.04093	4.37127e-18
Os03g0410900	0.50847	0.00437294
Os03g0411300	-0.732812	3.84775e-10
Os03g0411600	0.511225	0.0217892
Os03g0417800	-0.553921	6.33261e-21
Os03g0418700	-1.01844	9.31404e-18
Os03g0425000	0.871564	0.0233061
Os03g0425600	-2.03822	0.0307222
Os03g0426350	-1.18588	0.00244486
Os03g0427000	-0.875458	6.86472e-10
Os03g0428700	0.779323	0.00583175
Os03g0429000	0.555453	3.43829e-06
Os03g0431100	-0.678457	9.90164e-33
Os03g0431200	0.583358	2.20246e-06
Os03g0431600	1.67682	5.87299e-46
Os03g0434400	1.15449	1.21535e-12
Os03g0436400	-0.539776	8.14536e-09
Os03g0437200	0.934417	0.00275444
Os03g0439700	2.23878	1.01066e-46
Os03g0442900	-0.727644	2.13148e-07
Os03g0445700	1.6758	3.72248e-19
Os03g0452300	1.04373	6.59347e-06
Os03g0556600	-0.878265	0.00011908
Os03g0559700	0.999497	1.05791e-14
Os03g0563300	0.928349	0.000853075
Os03g0563600	-0.62893	1.35719e-15
Os03g0570800	-0.522721	0.0448184
Os03g0571900	1.93591	3.41846e-40
Os03g0572900	0.577405	2.68336e-06
Os03g0574300	0.630947	0.0130914
Os03g0579200	1.39247	0.00162468
Os03g0584400	2.82623	1.56469e-17
Os03g0591700	0.98888	3.95272e-14
Os03g0594400	0.749976	6.22501e-13
Os03g0594900	-5.5117	0.000232986
Os03g0595300	1.38366	0.0108636
Os03g0596800	-0.850861	0.00022296
Os03g0597600	-0.663365	4.03114e-11
Os03g0599000	0.586192	1.13864e-14
Os03g0599400	3.06331	0.00633814
Os03g0602300	1.66321	7.99764e-73
Os03g0603200	-4.23325	6.38478e-07
Os03g0604700	-0.90469	0.00778299
Os03g0608000	-1.37029	9.52404e-07
Os03g0609400	1.34831	0.00356496
Os03g0609500	-1.17771	2.29432e-31
Os03g0610650	0.66433	1.01916e-35
Os03g0617900	0.557384	1.25818e-32
Os03g0618300	0.9314	1.33642e-18
Os03g0619800	1.84292	0.0242342
Os03g0624300	-1.74834	0.00187731
Os03g0625201	1.23168	0.00824533
Os03g0625300	0.854589	0.0185957
Os03g0628800	-0.94243	1.62822e-57
Os03g0633500	-1.37274	8.65447e-22
Os03g0633800	-0.801823	5.14456e-26
Os03g0633900	0.543299	0.00232614
Os03g0634400	-0.661496	8.33514e-05
Os03g0636700	-0.728489	0.0404547
Os03g0636800	1.17122	2.68661e-06
Os03g0638200	-0.862807	1.92118e-28
Os03g0638900	1.18115	0.000407249
Os03g0639300	1.36173	0.00548696
Os03g0641200	-1.9326	6.91057e-11
Os03g0641250	-1.90271	4.39062e-18
Os03g0642300	-0.891682	0.0203269
Os03g0642900	0.657574	0.0294473
Os03g0643250	1.70721	0.000103671
Os03g0643300	0.773368	1.67726e-20
Os03g0643700	-3.8172	8.89551e-18
Os03g0645000	-0.881376	0.00199293
Os03g0646200	0.55874	0.0484541
Os03g0651950	-1.60263	2.13819e-12
Os03g0652000	-1.40803	1.30545e-13
Os03g0658800	2.91535	9.26854e-32
Os03g0661300	-1.64148	1.66891e-211
Os03g0661600	-0.591719	0.00191297
Os03g0663400	0.864823	3.9949e-44
Os03g0663500	1.4694	0.000155097
Os03g0663600	2.16924	9.63875e-42
Os03g0666700	-0.592444	8.63084e-10
Os03g0666800	-1.90039	0.0116645
Os03g0667300	2.8415	1.13131e-05
Os03g0667500	-1.55547	0.046733
Os03g0668900	0.626086	0.00102409
Os03g0671800	-1.31304	5.21067e-06
Os03g0672400	-0.643632	2.98807e-07
Os03g0672900	0.741639	0.0102288
Os03g0673700	-0.8975	1.18182e-28
Os03g0679700	0.786525	2.37682e-05
Os03g0684400	-0.621419	0.00504924
Os03g0684700	-1.40316	3.89706e-47
Os03g0685000	1.90281	0.00101945
Os03g0686500	-0.548107	0.0287994
Os03g0687700	3.17202	0.0223811
Os03g0689300	1.0226	1.82117e-11
Os03g0691400	-0.51736	0.00103646
Os03g0692400	0.674454	0.000858318
Os03g0692700	-0.665567	7.32327e-22
Os03g0693900	5.00182	8.9645e-15
Os03g0694000	4.89149	3.59678e-10
Os03g0699700	-2.29354	2.13754e-172
Os03g0699800	-1.23274	1.22443e-10
Os03g0701200	-1.10892	1.827e-52
Os03g0701600	-0.505412	1.53351e-11
Os03g0703000	-0.512046	1.06453e-51
Os03g0703100	-0.786616	7.75788e-27
Os03g0703300	0.901938	5.15632e-12
Os03g0704000	0.618226	0.00330231
Os03g0704100	1.14085	0.00643325
Os03g0708500	1.85388	0.00989823
Os03g0708700	-0.522943	1.33319e-06
Os03g0709000	-0.840852	4.43254e-76
Os03g0709300	2.45857	1.72694e-60
Os03g0710700	-1.6849	5.20445e-20
Os03g0711100	-1.80537	8.96405e-05
Os03g0711650	-1.254	0.0259977
Os03g0712800	1.68111	2.21438e-08
Os03g0718100	-0.690407	9.42062e-83
Os03g0719000	-1.30381	4.73326e-41
Os03g0719400	0.937944	6.17485e-13
Os03g0719850	-1.56079	0.0209211
Os03g0721300	-1.38601	6.73984e-27
Os03g0723600	-1.15421	2.08416e-16
Os03g0724600	1.8964	1.26228e-07
Os03g0725200	3.32398	2.16419e-10
Os03g0726100	-0.52005	1.61838e-60
Os03g0729100	1.42944	2.69613e-08
Os03g0730400	0.620256	2.20762e-12
Os03g0733000	0.593212	0.000721999
Os03g0733900	0.799279	0.000114716
Os03g0734000	-1.01639	1.42811e-31
Os03g0734200	0.856435	0.00867908
Os03g0734300	0.932211	6.47943e-16
Os03g0734900	-0.514879	0.000295698
Os03g0735000	0.939298	0.0344242
Os03g0735400	0.520488	0.0453954
Os03g0736500	-0.576942	0.000200931
Os03g0736900	0.79397	1.01546e-12
Os03g0739700	1.58708	0.0139346
Os03g0741050	0.557116	0.00119075
Os03g0742900	-0.856547	8.86666e-76
Os03g0743900	0.527869	2.36955e-45
Os03g0747900	-0.772506	3.62538e-16
Os03g0748700	1.13388	1.14193e-59
Os03g0750700	0.525045	9.36831e-07
Os03g0751100	2.51955	3.83717e-247
Os03g0752100	-0.543109	3.05568e-06
Os03g0754500	0.584163	8.49159e-09
Os03g0755100	0.524905	1.11534e-44
Os03g0757600	2.80573	8.32427e-70
Os03g0757950	-0.579094	2.71594e-09
Os03g0758100	0.744895	5.71952e-19
Os03g0758500	-0.532906	0.000209865
Os03g0759700	0.785454	2.95651e-09
Os03g0760200	1.56193	4.6156e-37
Os03g0760500	-0.585608	5.92813e-05
Os03g0760700	0.865865	1.11933e-33
Os03g0760800	1.76163	5.06553e-78
Os03g0762200	1.33911	3.48126e-05
Os03g0762300	1.36187	3.47846e-62
Os03g0762400	0.507995	0.00015729
Os03g0762500	1.52899	5.52656e-26
Os03g0764100	-0.595545	5.3854e-11
Os03g0765400	-1.05289	8.92934e-36
Os03g0765900	1.19957	0.000446664
Os03g0766800	1.16861	0.00502715
Os03g0767600	-0.636627	1.53549e-06
Os03g0768900	-2.04069	0.00190519
Os03g0769000	0.549567	0.000100278
Os03g0769100	0.804473	0.0121074
Os03g0769400	-0.617364	3.52719e-16
Os03g0772300	-0.52506	7.36477e-06
Os03g0773600	-0.655496	8.42686e-09
Os03g0776000	0.666804	1.28485e-62
Os03g0776900	1.02527	7.68847e-05
Os03g0778100	0.780002	9.49681e-05
Os03g0780600	-0.701197	1.4828e-35
Os03g0780800	-1.11857	1.47207e-37
Os03g0786100	1.59956	7.67152e-19
Os03g0789433	-0.609394	0.0149991
Os03g0789800	-0.680561	3.67914e-06
Os03g0790500	2.95274	5.46585e-24
Os03g0792800	-0.503988	0.000479302
Os03g0794200	1.25789	2.15231e-07
Os03g0795300	-1.17978	2.96761e-48
Os03g0796600	0.5644	6.85175e-05
Os03g0797400	2.44403	2.9394e-05
Os03g0798500	-0.943126	1.20743e-05
Os03g0799200	-0.878425	5.9544e-07
Os03g0799700	1.06255	0.000456394
Os03g0802200	0.999221	5.04391e-12
Os03g0803600	0.840516	0.0466814
Os03g0804900	1.1045	2.0621e-08
Os03g0805100	-1.01692	1.85167e-46
Os03g0805766	2.32214	0.0024331
Os03g0806500	-0.602822	3.28725e-12
Os03g0807100	-0.649505	5.40173e-07
Os03g0807500	-0.604911	0.000664147
Os03g0807900	1.56583	0.000484654
Os03g0808900	1.02869	3.5309e-05
Os03g0809000	-1.9406	9.07244e-42
Os03g0815400	1.10658	3.82318e-06
Os03g0817800	-0.546764	6.86528e-08
Os03g0818100	0.869652	3.55159e-53
Os03g0819600	0.721424	3.66289e-26
Os03g0822000	1.08364	1.0517e-10
Os03g0822400	-1.4797	0.0477341
Os03g0823000	0.553735	0.0295058
Os03g0825300	-0.640719	4.51034e-15
Os03g0826000	-0.618961	0.0140195
Os03g0826800	-1.32694	7.46359e-218
Os03g0826900	-1.14367	0.0309873
Os03g0827700	0.52391	4.80504e-06
Os03g0828500	-0.551036	0.000712411
Os03g0830200	-1.18957	0.000194169
Os03g0830400	-0.599581	5.49258e-07
Os03g0831100	0.525818	1.99391e-12
Os03g0831400	-2.01799	4.0612e-09
Os03g0831500	0.64918	2.4399e-20
Os03g0832600	-0.778345	1.74724e-44
Os03g0833600	-0.638466	6.03586e-06
Os03g0833700	0.54983	2.05435e-10
Os03g0835900	1.04971	3.79821e-142
Os03g0835950	1.72932	2.1232e-06
Os03g0836300	-1.07977	8.84842e-15
Os03g0839200	0.644744	2.69937e-05
Os03g0839800	0.541654	0.0268574
Os03g0840200	0.647351	3.44858e-09
Os03g0841700	0.530731	1.93791e-06
Os03g0843400	1.217	0.00524921
Os03g0848700	-0.821893	5.6756e-05
Os03g0850200	1.65059	0.0484429
Os03g0850400	1.55588	2.99301e-124
Os03g0850700	-0.917921	0.00277011
Os03g0850800	-0.517567	0.00354419
Os03g0850900	0.618142	9.30511e-07
Os03g0851700	0.632802	0.000518379
Os03g0851900	0.71586	2.70618e-25
Os03g0853200	2.73538	1.0493e-33
Os03g0854000	1.62686	1.04182e-40
Os03g0854600	-1.0328	3.22648e-29
Os03g0856300	-0.889964	4.88401e-09
Os03g0856500	-1.1461	4.53282e-29
Os03g0857000	-1.15426	0.00170593
Os03g0857500	-0.768321	0.00384112
Os03g0857600	-0.989398	3.49445e-05
Os03g0858600	-0.988509	1.25168e-05
Os03g0861100	-1.03227	2.04676e-71
Os04g0103500	0.695807	1.73963e-09
Os04g0103700	-0.989351	1.08316e-08
Os04g0103900	4.54168	0.00814605
Os04g0104900	3.17694	0.0222405
Os04g0105100	1.03044	4.51034e-15
Os04g0105700	0.842419	4.88122e-05
Os04g0109100	-1.95574	1.58619e-05
Os04g0110100	1.50393	0.00368365
Os04g0111100	-0.693318	1.14329e-11
Os04g0111200	0.625958	2.39789e-06
Os04g0112100	1.9859	3.2882e-24
Os04g0115200	1.5149	0.0360885
Os04g0115700	-0.714735	0.0007688
Os04g0115900	1.30313	0.0347507
Os04g0117900	0.502605	6.13957e-12
Os04g0121800	0.770586	0.000354396
Os04g0125700	0.914553	7.62061e-156
Os04g0125800	1.7654	7.6654e-05
Os04g0127100	-3.46242	0.00838936
Os04g0127200	-0.709146	1.72184e-14
Os04g0128001	1.29386	3.71584e-11
Os04g0128700	-1.21829	3.52537e-08
Os04g0132900	-3.67376	0.000451448
Os04g0135400	-2.00793	2.05277e-20
Os04g0136700	0.584197	2.57678e-05
Os04g0136802	-1.27188	6.70141e-05
Os04g0137201	0.949668	8.87132e-15
Os04g0138800	-1.19552	3.35286e-08
Os04g0140666	-1.17696	1.67804e-17
Os04g0142400	0.849988	3.50409e-13
Os04g0142850	-1.27461	0.0134534
Os04g0147200	-0.776265	0.00102351
Os04g0151700	-1.5838	0.040829
Os04g0162500	-1.12223	6.28618e-06
Os04g0162800	-2.90163	6.29143e-05
Os04g0164900	0.613715	0.00330077
Os04g0165700	0.851045	4.15325e-136
Os04g0169100	-0.79597	1.16312e-55
Os04g0173800	3.01932	2.87816e-21
Os04g0175400	-3.44076	1.27913e-12
Os04g0178300	1.43683	1.57614e-87
Os04g0179200	1.14647	1.42265e-07
Os04g0179700	0.634876	0.00378941
Os04g0182200	1.3453	1.71658e-39
Os04g0182900	1.90072	5.29909e-07
Os04g0184100	1.83996	4.33556e-33
Os04g0201000	0.624261	0.00155915
Os04g0202800	-2.83671	4.43942e-12
Os04g0203450	4.5601	0.030212
Os04g0203600	3.33763	1.09581e-07
Os04g0204100	7.0578	1.03553e-07
Os04g0204400	-1.24569	0.00590448
Os04g0206450	4.08617	0.000504598
Os04g0206600	7.85394	5.45429e-19
Os04g0206700	1.01543	7.13866e-34
Os04g0208200	-0.630283	0.000414241
Os04g0208400	3.22682	0.018751
Os04g0209200	1.92301	4.11816e-68
Os04g0223500	1.78145	2.54205e-65
Os04g0227000	1.52097	0.00324985
Os04g0228400	-1.14503	5.23812e-19
Os04g0228600	-1.71042	0.0226862
Os04g0229100	-0.739116	3.55041e-06
Os04g0233400	-1.84236	3.66806e-293
Os04g0234600	1.68794	5.07183e-10
Os04g0247500	-0.516799	0.00031046
Os04g0249700	-0.653259	0.00119897
Os04g0253000	-0.997419	3.7248e-42
Os04g0266900	0.639799	2.83154e-07
Os04g0268700	0.772931	1.41962e-05
Os04g0275100	-1.00297	0.00197504
Os04g0288100	-0.707617	7.66166e-12
Os04g0301500	1.32948	0.00171723
Os04g0301700	0.921398	0.000862747
Os04g0304400	1.37086	3.98066e-22
Os04g0306400	1.566	9.88861e-161
Os04g0308500	-0.935579	3.56691e-16
Os04g0308600	-1.89389	3.25544e-12
Os04g0309900	-1.86558	4.33824e-18
Os04g0310100	-0.935579	3.56691e-16
Os04g0310200	-0.52048	0.000315323
Os04g0311400	-0.596464	1.49971e-30
Os04g0316200	-1.26739	1.79422e-10
Os04g0321700	1.0038	2.03916e-31
Os04g0322100	-1.1684	6.61513e-08
Os04g0323500	-1.01114	0.0257323
Os04g0325300	-0.756308	0.0091986
Os04g0330200	1.35992	0.00337449
Os04g0339400	0.528665	0.0128855
Os04g0340300	2.5628	3.05592e-172
Os04g0340550	2.03916	0.0358116
Os04g0341500	1.51273	2.49705e-06
Os04g0347200	4.49232	3.96714e-136
Os04g0347900	0.515037	0.00515439
Os04g0349700	0.868681	3.84567e-13
Os04g0350100	0.560787	1.7971e-05
Os04g0351100	7.94719	1.66044e-09
Os04g0351333	-7.85378	2.94339e-09
Os04g0352400	-1.36776	3.25819e-14
Os04g0355401	-1.5118	0.0413562
Os04g0358000	-1.10276	4.83384e-26
Os04g0361500	-3.63873	0.0223163
Os04g0365100	-1.71179	4.67821e-60
Os04g0366200	-3.45797	0.000325316
Os04g0367000	-1.2349	5.66193e-12
Os04g0367400	-0.577265	1.21212e-07
Os04g0368000	-1.17686	5.28856e-20
Os04g0370600	0.596956	0.000977988
Os04g0370900	-1.08204	8.25296e-07
Os04g0371100	-2.1464	7.97021e-05
Os04g0373400	2.59211	3.34103e-136
Os04g0376700	-0.873988	1.95578e-08
Os04g0380200	-0.61559	0.00515611
Os04g0380300	-3.45237	0
Os04g0381700	1.32598	2.39611e-40
Os04g0382300	-0.797961	8.30607e-61
Os04g0382900	-0.931299	0.00306427
Os04g0388700	-0.608391	1.18835e-35
Os04g0389100	-0.764701	0.0433704
Os04g0391500	-1.15846	5.89149e-52
Os04g0398000	1.21074	4.7171e-24
Os04g0400600	-2.0513	0.0107676
Os04g0400800	-0.683299	3.42531e-06
Os04g0402700	-1.21534	3.82807e-10
Os04g0403900	-0.560413	9.63736e-15
Os04g0404400	1.25339	5.94142e-09
Os04g0404800	0.662228	3.33376e-48
Os04g0406600	0.519371	8.54913e-08
Os04g0412000	-2.24522	7.08682e-11
Os04g0412100	3.17329	0.000488134
Os04g0412300	-1.3821	2.74226e-09
Os04g0412500	-1.26859	5.24271e-10
Os04g0414000	0.74628	0.0110481
Os04g0415000	-0.5437	1.9933e-09
Os04g0415401	0.541429	0.0451543
Os04g0415800	4.2183	1.12008e-130
Os04g0417000	2.64228	0.000107796
Os04g0417800	-0.620224	2.27464e-05
Os04g0418800	0.922311	8.80189e-83
Os04g0419100	2.02933	1.35699e-10
Os04g0419550	-0.542832	0.0167548
Os04g0419600	-0.534935	0.000247126
Os04g0420900	1.38509	3.53989e-18
Os04g0422000	1.04234	0.0118464
Os04g0430000	-0.648533	1.90421e-08
Os04g0430600	0.685936	1.18407e-07
Os04g0430700	0.946995	6.31721e-14
Os04g0432100	0.711449	0.0495974
Os04g0435500	-0.597482	3.80732e-06
Os04g0436300	0.567027	0.00673967
Os04g0436800	0.554654	0.0130652
Os04g0438101	-1.73214	4.58707e-15
Os04g0438200	-1.75447	1.75531e-81
Os04g0438300	-0.768414	0.00480141
Os04g0438400	-0.871183	2.69937e-05
Os04g0438600	-1.42406	1.42807e-22
Os04g0443300	1.15731	0.00187551
Os04g0444300	-0.603103	3.47219e-10
Os04g0444900	0.538735	6.01797e-05
Os04g0445000	-0.555902	3.46392e-09
Os04g0445700	1.22658	0.00912327
Os04g0446401	-0.755117	0.00499306
Os04g0447600	-1.60525	1.58025e-10
Os04g0447700	1.00625	2.51291e-10
Os04g0448600	0.549455	5.13937e-05
Os04g0449200	-1.09465	2.0626e-07
Os04g0450000	1.08653	0.000830944
Os04g0450600	-0.550824	7.92578e-08
Os04g0450701	-1.74811	2.21646e-34
Os04g0450900	1.10705	1.18437e-15
[truncated: 2,870 more rows]

## Sheet: Nip_Mock vs OE_Mock
Supplemental Table 1. Differentially expressed genes in roots in response to NaCl treatment.
Gene ID	log2 (Nip_Mock vs OE_Mock)	Qvalue (Nip_Mock vs OE_Mock)
Os01g0106400	0.613277	1.98E-05
Os01g0109000	-0.62463	0.00855946
Os01g0109201	-0.620526	0.0124632
Os01g0111500	-0.514023	0.0322656
Os01g0113200	2.01874	2.56E-19
Os01g0113300	1.18545	4.27E-07
Os01g0113400	2.24271	9.65E-19
Os01g0113700	0.779	1.58E-08
Os01g0113750	-3.07424	1.72E-04
Os01g0114100	3.11354	6.59E-50
Os01g0114300	1.96155	2.61E-07
Os01g0114600	3.1739	0.0401688
Os01g0115300	1.99405	1.53E-06
Os01g0115800	-0.617625	0.0112937
Os01g0116400	-6.09813	7.18E-27
Os01g0116650	-4.51599	0.0170907
Os01g0117000	-2.48734	0.00103963
Os01g0117300	-4.63316	0.0114688
Os01g0117600	-0.771351	0.0270496
Os01g0121600	0.814673	0.0106492
Os01g0124700	0.504448	0.00125714
Os01g0124900	-6.0411	1.79E-04
Os01g0125600	0.57513	5.47E-10
Os01g0126100	-1.08041	1.97E-08
Os01g0126401	-5.27412	0.00496757
Os01g0126600	-4.65814	1.14E-31
Os01g0127600	1.11621	4.66E-139
Os01g0127700	1.26467	0.00340177
Os01g0132000	-1.06399	1.26E-55
Os01g0134700	0.973812	3.53E-17
Os01g0134900	-0.531508	7.19E-12
Os01g0138800	1.39841	6.94E-59
Os01g0138900	0.530836	1.42E-33
Os01g0140700	-1.29432	0.00786567
Os01g0144200	0.527844	3.67E-06
Os01g0144700	0.582703	0.00118841
Os01g0144800	-2.12076	0.00665249
Os01g0145200	1.03329	1.43E-04
Os01g0145600	0.832793	7.76E-04
Os01g0146101	0.849851	7.64E-08
Os01g0148100	0.833727	1.53E-09
Os01g0148400	0.633579	2.39E-13
Os01g0148500	0.678041	8.99E-09
Os01g0149800	-0.682734	5.16E-11
Os01g0150700	-8.39779	2.21E-10
Os01g0151500	-1.3902	2.55E-22
Os01g0152800	0.756797	0.00414152
Os01g0153700	0.676531	0.0160004
Os01g0155500	-0.577509	0.0419134
Os01g0158600	0.748856	7.12E-05
Os01g0159000	1.04791	9.03E-05
Os01g0162701	0.914687	0.0389289
Os01g0164300	-0.91402	0.00117394
Os01g0170000	-0.728617	0.00669474
Os01g0170051	-0.562001	0.0360868
Os01g0173600	-0.63092	0.00273948
Os01g0175400	-2.01362	9.38E-04
Os01g0179800	-1.15354	1.63E-06
Os01g0180300	0.571033	0.00944653
Os01g0184100	-0.660178	0.00872693
Os01g0189800	0.959906	3.24E-15
Os01g0190000	0.518149	0.00139203
Os01g0191200	1.2583	6.56E-23
Os01g0191700	-0.852419	2.59E-28
Os01g0192000	0.728891	2.98E-74
Os01g0192600	-0.623588	1.07E-07
Os01g0192900	-0.689225	1.77E-06
Os01g0194600	-0.660077	3.14E-10
Os01g0196300	-1.00049	0.00781445
Os01g0200700	-1.24328	1.50E-20
Os01g0201200	-0.678769	6.09E-16
Os01g0203000	0.522644	1.12E-07
Os01g0203800	0.606747	5.86E-05
Os01g0206300	-1.15224	0.0302538
Os01g0209800	-0.899677	0.046381
Os01g0210600	-0.76125	2.42E-32
Os01g0213400	0.566474	0.0408082
Os01g0213800	-0.860433	0.0151093
Os01g0214200	-0.562866	2.09E-12
Os01g0214600	1.02869	7.76E-11
Os01g0215500	-1.32957	1.59E-09
Os01g0216000	0.660451	4.03E-53
Os01g0216400	-1.02033	1.14E-04
Os01g0216500	-0.781882	4.68E-04
Os01g0218100	-0.647139	2.16E-45
Os01g0218500	-2.77547	0.031211
Os01g0220700	-1.74824	1.02E-04
Os01g0224000	1.08886	7.23E-08
Os01g0226200	1.16728	0.00159593
Os01g0226400	1.65972	1.85E-08
Os01g0226500	0.503304	0.00182541
Os01g0226600	4.54889	4.03E-05
Os01g0227100	0.74218	2.38E-07
Os01g0227200	0.753497	1.69E-34
Os01g0229600	0.928856	0.00246174
Os01g0233100	0.736309	0.0012912
Os01g0233500	0.898626	1.85E-09
Os01g0234900	0.539341	1.48E-11
Os01g0238200	-0.766595	9.15E-06
Os01g0238500	0.778551	3.67E-20
Os01g0239300	1.01162	0.0464275
Os01g0247600	1.80783	6.87E-04
Os01g0248300	0.634026	5.38E-04
Os01g0248500	-1.3728	3.84E-10
Os01g0248900	-0.688954	0.00135069
Os01g0258100	0.776019	0.0374441
Os01g0261200	0.541424	1.13E-25
Os01g0262401	-4.65465	0.0368261
Os01g0266800	0.655544	1.69E-13
Os01g0269500	1.02432	0.0108105
Os01g0272600	0.553042	5.91E-05
Os01g0273800	-1.37373	4.44E-20
Os01g0274500	-0.541686	0.00282961
Os01g0275300	1.39455	3.69E-09
Os01g0275900	-0.684882	3.15E-05
Os01g0276600	0.790501	1.31E-07
Os01g0277500	0.708649	2.12E-09
Os01g0278200	1.72614	2.50E-06
Os01g0281000	0.691422	2.68E-35
Os01g0283300	1.86969	3.29E-162
Os01g0285300	-0.678054	2.45E-15
Os01g0287700	-0.828341	0.00458474
Os01g0288200	0.830788	0.00902699
Os01g0290000	0.600251	7.52E-47
Os01g0293000	-6.6618	2.07E-67
Os01g0293501	-4.18478	0.00735247
Os01g0294500	-1.30269	7.30E-72
Os01g0294700	-0.521979	1.64E-60
Os01g0295700	0.618955	1.55E-07
Os01g0296100	0.734028	7.06E-45
Os01g0296200	-1.30301	4.31E-11
Os01g0296450	-0.657585	5.76E-07
Os01g0297200	-0.905157	1.25E-07
Os01g0299400	-0.540213	0.0327951
Os01g0299500	1.71029	3.23E-147
Os01g0302100	8.69268	2.44E-11
Os01g0302250	1.92789	0.0138913
Os01g0302500	0.998918	6.87E-04
Os01g0303000	2.42623	5.69E-08
Os01g0303800	1.50237	3.61E-68
Os01g0306800	1.08083	3.65E-05
Os01g0307500	-2.64134	1.99E-04
Os01g0308600	-2.38833	3.60E-07
Os01g0309451	6.5168	1.35E-05
Os01g0310500	0.849663	3.03E-14
Os01g0310550	2.16762	0.0238798
Os01g0310600	6.4448	5.44E-06
Os01g0311300	6.12055	1.08E-04
Os01g0311800	-0.802541	5.94E-05
Os01g0312500	-0.779867	4.97E-04
Os01g0316600	-0.7729	0.00121304
Os01g0317800	-0.584891	0.046381
Os01g0327000	0.526617	5.08E-06
Os01g0327100	-1.06219	1.85E-14
Os01g0330200	-1.97898	4.52E-91
Os01g0332100	0.781667	2.74E-25
Os01g0337700	1.11087	8.60E-04
Os01g0339500	-2.1709	0.0048769
Os01g0348900	-1.29955	5.26E-157
Os01g0349600	0.840344	1.62E-04
Os01g0355250	0.754439	2.40E-08
Os01g0359600	1.34494	1.58E-22
Os01g0362400	0.824052	0.0216818
Os01g0364800	1.1789	0.013215
Os01g0378100	-2.75911	0.00106947
Os01g0382450	4.27398	2.36E-04
Os01g0384800	0.738039	6.94E-27
Os01g0385400	-0.68343	0.00830899
Os01g0392600	-1.55073	1.05E-67
Os01g0501800	-0.511845	0.0104972
Os01g0504100	-0.613852	0.0453632
Os01g0520180	-10.3776	1.46E-16
Os01g0520600	1.56712	1.16E-10
Os01g0521200	7.5302	4.11E-08
Os01g0521600	0.797614	4.90E-15
Os01g0522400	2.98284	3.66E-55
Os01g0525100	5.4057	0.00255302
Os01g0530650	0.939403	0.00117125
Os01g0533900	0.787045	6.97E-27
Os01g0537250	2.37645	0
Os01g0542700	-0.948999	1.24E-04
Os01g0546100	1.73776	5.17E-21
Os01g0553901	-1.70809	2.49E-08
Os01g0558700	-1.38178	0.00411417
Os01g0559500	2.21917	4.02E-16
Os01g0559750	-0.725043	1.08E-34
Os01g0559900	-0.623826	1.32E-16
Os01g0564300	-0.594481	8.34E-08
Os01g0565900	-0.517869	0.0174018
Os01g0566100	0.544094	2.08E-24
Os01g0566500	2.83748	6.12E-06
Os01g0576050	-1.87523	2.33E-06
Os01g0580500	1.04335	8.69E-08
Os01g0591300	-0.682662	9.45E-73
Os01g0594800	1.37904	0.0447936
Os01g0597600	-1.73911	0.00815052
Os01g0600900	-1.22593	2.65E-13
Os01g0607100	3.07516	0.00187175
Os01g0609000	-0.946673	3.44E-08
Os01g0612500	-1.83579	5.51E-20
Os01g0623500	0.734443	7.21E-27
Os01g0623600	-0.730707	0.0462842
Os01g0627600	0.647668	0.0237678
Os01g0627900	1.92237	0.00724778
Os01g0627967	-1.46844	3.96E-04
Os01g0631200	-0.622689	2.26E-08
Os01g0638000	0.943366	4.18E-05
Os01g0638600	-1.39468	1.20E-07
Os01g0639900	-0.513782	5.81E-28
Os01g0642200	-0.686476	3.44E-08
Os01g0648000	-1.22625	3.39E-77
Os01g0659900	-0.924611	2.22E-12
Os01g0660000	1.63428	0.0167449
Os01g0668500	2.44907	0.0413857
Os01g0669100	-0.745546	4.18E-04
Os01g0670600	-0.518076	0.0486518
Os01g0680200	-0.79802	2.84E-10
Os01g0680500	-0.837828	0.0192003
Os01g0681200	-0.723924	1.94E-34
Os01g0687300	1.02605	3.00E-117
Os01g0690800	0.778173	1.77E-04
Os01g0692300	-1.37676	9.35E-04
Os01g0693400	0.515924	1.74E-05
Os01g0695100	-0.512857	1.27E-08
Os01g0695150	-0.516957	1.48E-12
Os01g0699600	-1.08439	0.0226436
Os01g0700100	-1.3178	0.0360868
Os01g0701700	-3.28867	1.20E-07
Os01g0702300	-0.973239	0.00375304
Os01g0704100	-0.684692	0.00441352
Os01g0714600	0.943241	9.92E-06
Os01g0716500	0.769948	0.0254505
Os01g0716800	-0.507158	0.0254713
Os01g0717000	-0.543583	6.27E-16
Os01g0719100	0.660359	3.10E-05
Os01g0719125	1.19799	0.0183669
Os01g0719600	-0.793685	4.96E-05
Os01g0719900	-0.708632	0.00488813
Os01g0723500	-1.87904	1.23E-04
Os01g0723800	0.601127	3.54E-12
Os01g0726801	0.765022	0.0421804
Os01g0728150	-0.863918	0.0363035
Os01g0731800	0.78011	3.53E-05
Os01g0733200	0.918764	0.00283467
Os01g0734800	-0.593446	0.0157795
Os01g0743100	-0.726181	0.0032681
Os01g0743200	-1.04286	6.36E-04
Os01g0748950	-1.38329	0.0322781
Os01g0749200	0.507189	0.0208124
Os01g0754800	-0.550649	8.88E-04
Os01g0757200	0.633497	0.00490151
Os01g0757900	0.606937	0.002026
Os01g0760000	0.883539	1.62E-14
Os01g0762500	-1.34135	0.00182125
Os01g0764900	0.582266	0.0022198
Os01g0771000	-0.695791	0.0032466
Os01g0771400	4.66872	0.0318232
Os01g0773400	0.554694	6.57E-05
Os01g0781600	0.575073	0.0017096
Os01g0781833	0.575073	0.0017096
Os01g0784450	-0.621368	0.00716598
Os01g0784500	-0.741113	8.36E-11
Os01g0786601	-1.40548	8.92E-06
Os01g0786700	-1.22006	7.85E-09
Os01g0787000	-0.571949	2.00E-08
Os01g0793800	0.639889	0.014041
Os01g0794100	-0.782988	4.69E-04
Os01g0794800	-0.532444	5.21E-09
Os01g0795000	-0.972108	2.56E-61
Os01g0795200	-2.91488	1.88E-07
Os01g0797900	-0.59594	0.00225328
Os01g0799100	0.876705	1.15E-09
Os01g0800500	-0.773697	0.00808136
Os01g0802700	-1.02531	0.0183928
Os01g0802900	-0.652134	1.20E-11
Os01g0803900	-1.36809	1.67E-05
Os01g0804400	-1.00017	0.00929901
Os01g0810800	-0.524324	5.37E-38
Os01g0812100	-0.968602	0.0372839
Os01g0813800	-1.95448	1.50E-27
Os01g0814550	-1.86619	4.83E-05
Os01g0815400	-0.986321	4.41E-07
Os01g0816100	0.585313	0.02879
Os01g0816600	-0.518536	5.77E-14
Os01g0817100	-0.631615	0.0071768
Os01g0822800	0.830564	2.18E-07
Os01g0824700	0.694055	0.0119697
Os01g0826400	0.667969	0.00432409
Os01g0831250	-0.732013	0.0151903
Os01g0831300	-0.796288	0.0130644
Os01g0833400	0.621476	1.02E-04
Os01g0836600	-0.533878	0.0144931
Os01g0837000	0.523543	8.01E-05
Os01g0837800	0.587413	9.36E-12
Os01g0839900	0.510396	2.29E-07
Os01g0840100	-1.40356	5.60E-30
Os01g0843500	-0.630556	0.0104165
Os01g0847600	-0.734035	0.0167322
Os01g0850700	0.652593	3.58E-32
Os01g0850900	-0.799734	1.43E-04
Os01g0852650	5.34603	0.00315005
Os01g0852800	6.7166	4.78E-06
Os01g0854000	0.769213	5.57E-15
Os01g0856000	-0.615305	0.0233023
Os01g0857400	-0.859554	3.70E-12
Os01g0861700	0.730335	3.74E-18
Os01g0861900	0.576138	9.61E-04
Os01g0863300	0.69299	0.0445393
Os01g0865700	-1.03055	0.0139594
Os01g0869750	6.7166	4.78E-06
Os01g0869800	1.92193	0.00376136
Os01g0873200	0.954897	0.0125729
Os01g0878900	-0.767046	0.0286771
Os01g0880300	-0.543165	1.42E-04
Os01g0880800	-0.543983	2.78E-05
Os01g0881300	0.958572	5.14E-92
Os01g0881900	0.612101	5.49E-29
Os01g0882800	-1.80749	6.24E-05
Os01g0883800	1.2093	0.0469745
Os01g0884300	0.516809	2.57E-17
Os01g0885300	0.548828	3.53E-36
Os01g0901500	-0.676058	8.19E-05
Os01g0905300	0.848467	0.013215
Os01g0907600	-10.7957	6.81E-18
Os01g0910500	-0.922004	3.82E-13
Os01g0919800	-1.68088	6.20E-04
Os01g0924200	-0.537746	4.97E-09
Os01g0930500	1.19501	1.31E-16
Os01g0931600	0.743233	1.82E-04
Os01g0934800	-1.77998	7.35E-25
Os01g0935800	-1.11845	1.31E-18
Os01g0937600	1.57387	0.0107043
Os01g0940700	-2.50499	2.57E-19
Os01g0945600	-0.633931	3.79E-13
Os01g0946700	-0.514273	1.05E-29
Os01g0947000	-2.32501	3.94E-205
Os01g0949500	-0.554248	2.13E-05
Os01g0949700	-0.593436	0.032047
Os01g0949800	-0.656323	1.20E-08
Os01g0950300	-0.603579	5.32E-08
Os01g0954000	-1.08218	0.0344781
Os01g0958200	-1.21148	0.0122041
Os01g0963600	-0.891388	2.67E-07
Os01g0965900	-0.635744	0.00373413
Os01g0968300	1.08464	6.16E-06
Os01g0968400	0.731294	7.59E-05
Os01g0970900	-0.501026	5.37E-04
Os01g0971800	1.34606	2.49E-18
Os01g0974400	-0.625767	0.0145354
Os01g0974701	-1.06923	0.0482804
Os01g0975900	-0.860693	1.71E-63
Os01g0976200	0.989117	1.37E-05
Os02g0101500	2.69396	2.25E-04
Os02g0103800	3.18772	0.0141511
Os02g0106100	-0.663474	1.42E-22
Os02g0114100	-0.713039	0.0106783
Os02g0115900	-0.688439	1.52E-101
Os02g0120000	0.600928	0.00150778
Os02g0121500	0.612402	0.00158437
Os02g0123700	-0.581873	0.0388741
Os02g0129800	-1.54395	3.10E-07
Os02g0131400	-0.963953	4.70E-76
Os02g0131800	-0.543618	1.58E-46
Os02g0135200	0.537845	0.0362795
Os02g0139100	-0.508711	6.27E-07
Os02g0141300	0.614475	1.69E-43
Os02g0142100	-1.06297	6.83E-09
Os02g0145200	4.35828	5.19E-15
Os02g0147300	0.644718	0.00440199
Os02g0157600	-0.625793	1.77E-52
Os02g0159100	3.45427	0.00549695
Os02g0159200	0.749579	9.37E-50
Os02g0161900	-1.7205	0
Os02g0162000	-12.1003	1.05E-22
Os02g0163300	-2.70924	0.00553251
Os02g0163400	-2.36374	3.34E-09
Os02g0163500	-3.90264	2.94E-07
Os02g0164000	-0.841347	1.40E-08
Os02g0165200	-0.513972	0.0116582
Os02g0166200	-0.711557	8.44E-07
Os02g0178700	-0.684026	0.0035031
Os02g0181900	-0.941916	8.95E-11
Os02g0184900	-0.745185	3.60E-64
Os02g0185200	-1.12661	1.92E-07
Os02g0185300	-0.789741	0.0134492
Os02g0185400	-3.51019	0.0111165
Os02g0189400	0.656788	1.59E-04
Os02g0189900	0.540054	0.00273178
Os02g0191300	0.725942	3.62E-43
Os02g0191600	0.929961	0.00164083
Os02g0191700	0.647875	0.00803975
Os02g0193732	-1.57397	1.65E-10
Os02g0194400	2.52917	0.0283193
Os02g0194700	4.67141	0.035148
Os02g0198700	0.919271	5.79E-15
Os02g0199500	0.627229	9.10E-06
Os02g0200300	0.988116	5.34E-14
Os02g0201300	1.59253	4.90E-06
Os02g0202300	0.696025	1.40E-05
Os02g0203000	-1.30629	2.01E-09
Os02g0203300	0.672099	2.78E-04
Os02g0205100	3.65956	2.17E-05
Os02g0205200	3.53342	2.43E-66
Os02g0207400	-8.2011	7.07E-10
Os02g0207500	-4.74384	0.00843079
Os02g0208300	-7.6276	0.0107669
Os02g0209400	5.57124	0.00173332
Os02g0210900	3.0284	8.42E-04
Os02g0211000	3.27306	4.31E-04
Os02g0211350	8.46893	1.10E-10
Os02g0211800	-1.78349	1.26E-16
Os02g0212500	-1.98443	8.42E-06
Os02g0212975	2.25317	0.0231959
Os02g0213100	5.62057	0.00104002
Os02g0213450	3.71267	0.0327528
Os02g0214500	4.49957	0.0147675
Os02g0214900	-0.867264	0.0203861
Os02g0215000	0.843321	1.24E-12
Os02g0215200	1.58516	5.08E-25
Os02g0215400	1.99579	1.84E-04
Os02g0215500	2.78267	6.84E-33
Os02g0215600	8.26192	4.17E-10
Os02g0215650	6.11926	1.03E-04
Os02g0215950	4.12388	2.66E-13
Os02g0216100	6.1868	8.13E-05
Os02g0216150	6.11848	1.08E-04
Os02g0216200	4.8445	0.0047332
Os02g0216300	-0.662921	1.65E-105
Os02g0216400	3.44889	0.0127668
Os02g0216500	2.02089	1.51E-31
Os02g0217800	0.668557	1.32E-04
Os02g0218700	-2.53268	3.69E-30
Os02g0218750	-6.43125	0.0179967
Os02g0218800	1.88793	1.69E-138
Os02g0220400	-1.69769	1.11E-05
Os02g0221400	2.86673	1.30E-08
Os02g0221900	4.52752	5.70E-17
Os02g0222100	0.803083	1.70E-07
Os02g0222500	1.18507	2.80E-11
Os02g0223200	4.5115	4.48E-29
Os02g0223300	7.51408	1.62E-08
Os02g0223700	-0.531518	3.33E-04
Os02g0224800	-0.584664	1.09E-06
Os02g0224900	0.89822	1.59E-05
Os02g0225000	3.32539	1.03E-14
Os02g0227100	0.799576	7.24E-28
Os02g0227600	3.60428	1.07E-06
Os02g0230000	0.804602	0.00419395
Os02g0230875	2.38168	0.0280441
Os02g0231600	9.59503	4.69E-14
Os02g0231700	7.34626	1.29E-07
Os02g0232000	1.37142	0.00266357
Os02g0236000	-0.627054	4.94E-37
Os02g0237100	-1.03626	1.04E-27
Os02g0238500	-1.51657	2.23E-08
Os02g0240100	4.33985	1.03E-19
Os02g0241300	11.0623	6.22E-19
Os02g0242100	-1.13141	0.0010287
Os02g0242900	-0.829552	0.00123456
Os02g0244600	-0.652697	8.36E-37
Os02g0244650	-3.09312	0.0193291
Os02g0245200	7.90274	1.80E-09
Os02g0247200	0.649697	6.40E-11
Os02g0247600	-3.34841	0.0252599
Os02g0247800	-0.636774	6.09E-04
Os02g0249200	1.9925	0.0104888
Os02g0250600	-2.94452	0.0108222
Os02g0250700	1.01158	1.22E-04
Os02g0255500	1.11323	1.59E-61
Os02g0256000	3.41823	1.52E-08
Os02g0256200	0.540809	1.10E-30
Os02g0261400	4.76112	0.0239962
Os02g0264700	3.82151	1.40E-23
Os02g0265100	3.84331	0.00338238
Os02g0266900	6.51664	1.37E-05
Os02g0267000	-0.560722	0.0449442
Os02g0269000	0.510172	0.00116262
Os02g0269200	0.879895	7.11E-18
Os02g0269650	7.20082	9.58E-08
Os02g0270800	-5.81304	5.52E-04
Os02g0271600	2.11794	4.38E-10
Os02g0271900	1.58098	3.39E-45
Os02g0272350	1.87818	1.26E-05
Os02g0272800	-0.648792	0.0367666
Os02g0272900	1.55588	1.91E-27
Os02g0274900	1.10584	8.10E-25
Os02g0276200	4.84431	1.76E-155
Os02g0277600	0.698782	1.22E-05
Os02g0278700	1.16979	0.0121054
Os02g0281200	1.90037	8.30E-14
Os02g0282500	-3.87179	8.85E-29
Os02g0282600	3.32914	1.61E-05
Os02g0283800	0.6519	3.38E-23
Os02g0284500	-0.527705	5.98E-04
Os02g0285300	-0.567617	2.28E-24
Os02g0286200	0.616603	1.27E-04
Os02g0286891	-1.519	0.00217497
Os02g0287000	0.552551	2.58E-43
Os02g0288400	5.21986	0.00530676
Os02g0289500	3.34053	2.53E-04
Os02g0289700	7.9117	3.93E-09
Os02g0291400	-1.54351	3.07E-09
Os02g0291500	0.801152	0.00105609
Os02g0292800	5.887	7.36E-05
Os02g0297200	7.13601	4.70E-07
Os02g0301100	-2.19702	3.77E-121
Os02g0301650	3.44882	0.0129429
Os02g0302200	0.76977	0.0258208
Os02g0302900	0.964367	2.60E-11
Os02g0303000	8.05614	1.59E-09
Os02g0303200	7.63178	2.45E-08
Os02g0304900	0.612112	1.74E-10
Os02g0306100	1.01285	4.11E-05
Os02g0306250	1.47146	1.38E-05
Os02g0306550	0.700551	1.33E-04
Os02g0306600	4.34793	6.71E-06
Os02g0310200	1.07051	2.16E-68
Os02g0310400	7.42041	8.36E-08
Os02g0313900	1.16258	4.97E-13
Os02g0314300	-1.28351	0.00451539
Os02g0316200	0.750127	1.91E-07
Os02g0317500	7.41977	4.38E-11
Os02g0318100	-0.922454	1.42E-07
Os02g0319300	1.83951	2.64E-30
Os02g0319400	4.66622	0.0356776
Os02g0321500	0.577785	0.0064413
Os02g0324200	0.897602	5.23E-05
Os02g0325600	0.530679	0.0148299
Os02g0326000	-0.613606	0.006368
Os02g0326100	2.34484	0.0419552
Os02g0326200	1.05899	0.0223071
Os02g0327000	0.580018	5.04E-20
Os02g0327500	0.825535	5.80E-09
Os02g0327700	1.17618	3.89E-173
Os02g0328550	2.13798	0.0288688
Os02g0328600	0.594625	1.98E-04
Os02g0329600	0.535978	0.0113931
Os02g0332700	0.603637	0.0126804
Os02g0332800	0.7475	7.26E-16
Os02g0433900	5.53783	3.01E-16
Os02g0435200	5.54316	7.49E-43
Os02g0435400	4.99413	1.88E-30
Os02g0435600	6.42798	4.37E-08
Os02g0437300	2.45025	9.33E-18
Os02g0437901	7.26906	2.06E-07
Os02g0438700	5.887	7.36E-05
Os02g0451501	-5.53638	0.00183932
Os02g0457600	1.88423	0.0231959
Os02g0463500	-3.18283	0.0103946
Os02g0466600	0.728232	1.73E-04
Os02g0467200	10.3243	1.98E-16
Os02g0467300	5.61968	0.00102818
Os02g0467400	9.34885	5.37E-18
Os02g0467500	5.15504	0.00804606
Os02g0469000	0.769203	0.00259492
Os02g0469300	1.88171	9.71E-24
Os02g0477100	6.06923	8.92E-14
Os02g0477300	10.7981	5.21E-18
Os02g0478050	1.70234	3.52E-09
Os02g0478500	0.567856	0.0191302
Os02g0478700	1.39336	3.01E-68
Os02g0479700	7.08388	6.88E-07
Os02g0481900	-1.12826	5.53E-13
Os02g0482200	1.78498	2.89E-04
Os02g0482400	2.61644	0.013245
Os02g0484900	1.09045	5.35E-18
Os02g0484975	1.26557	4.15E-28
Os02g0485000	1.03783	5.69E-12
Os02g0486400	0.968758	0.00960704
Os02g0488600	0.917518	1.51E-54
Os02g0489400	-0.583138	1.74E-34
Os02g0490500	-0.556021	3.28E-11
Os02g0494000	-4.00309	0.0123722
Os02g0494400	-2.22983	4.99E-17
Os02g0495400	1.7413	3.54E-14
Os02g0496300	2.70708	2.00E-31
Os02g0496500	1.58567	1.48E-29
Os02g0497600	3.4284	3.56E-10
Os02g0498100	3.38499	5.33E-13
Os02g0498300	-1.41147	0.001066
Os02g0501350	2.21944	1.81E-09
Os02g0503900	-1.61777	5.98E-42
Os02g0504050	2.07806	4.07E-07
Os02g0505066	-0.898622	2.33E-13
Os02g0506100	-0.660785	1.35E-04
Os02g0508100	2.17742	5.42E-35
Os02g0508500	2.86102	1.74E-10
Os02g0509500	1.79533	1.74E-14
Os02g0510100	0.745136	2.99E-14
Os02g0510400	4.55639	0.0132448
Os02g0510600	1.65648	1.42E-17
Os02g0511600	1.73131	6.83E-05
Os02g0511800	1.60504	1.02E-09
Os02g0513100	-6.83882	3.75E-06
Os02g0515125	-4.86302	0.0211196
Os02g0517333	3.93423	0.00145567
Os02g0518400	1.57109	8.92E-09
Os02g0520000	2.65758	0.00442162
Os02g0520100	-0.667188	1.81E-08
Os02g0522300	1.37805	3.25E-106
Os02g0524600	0.503558	5.38E-06
Os02g0528200	1.26204	2.80E-06
Os02g0528500	2.66959	8.52E-10
Os02g0529800	-0.894485	0.041412
Os02g0530300	-0.559765	0.00241246
Os02g0531600	1.10252	4.96E-18
Os02g0532500	0.734838	9.27E-05
Os02g0533700	0.510887	0.00811965
Os02g0534400	-0.93379	5.46E-52
Os02g0536400	0.501238	5.19E-04
Os02g0537200	0.590762	0.00558834
Os02g0538900	1.12908	7.53E-08
Os02g0539100	0.729905	2.57E-17
Os02g0541700	0.989581	5.34E-33
Os02g0542500	1.72645	2.29E-92
Os02g0542600	2.94732	0.00228328
Os02g0543000	1.9722	0
Os02g0552400	1.11621	2.55E-16
Os02g0552700	0.663891	0.00349584
Os02g0554800	0.990109	0.0102834
Os02g0554900	0.851376	5.98E-17
Os02g0555900	-8.60522	5.18E-11
Os02g0556100	0.670199	4.02E-17
Os02g0559300	-0.843567	0.0209438
Os02g0570400	-1.61067	6.70E-14
Os02g0570700	-1.8762	1.14E-09
Os02g0571100	-2.67714	1.87E-21
Os02g0579800	0.732744	3.24E-34
Os02g0582600	0.562684	1.44E-18
Os02g0582900	-0.786026	1.79E-73
Os02g0584200	-0.843313	1.77E-07
Os02g0584700	1.32538	2.05E-08
Os02g0584800	1.42429	7.94E-08
Os02g0585100	1.5877	1.14E-08
Os02g0585200	1.60461	2.48E-08
Os02g0586900	-0.510003	0.00103471
Os02g0590700	2.44518	9.90E-19
Os02g0590850	5.01189	1.54E-08
Os02g0595900	-0.885274	1.20E-27
Os02g0596700	-1.01292	0.0142297
Os02g0597300	0.705586	7.58E-04
Os02g0601100	-0.503256	4.29E-04
Os02g0610500	-0.686458	0.00304142
Os02g0618400	1.43411	0.0485938
Os02g0620600	-1.37041	1.15E-51
Os02g0622500	-1.20995	0.0201467
Os02g0625300	-0.630511	0.00742101
Os02g0629000	0.892045	1.57E-15
Os02g0629800	-0.542281	3.72E-10
Os02g0637200	1.35563	1.47E-04
Os02g0644400	-7.82458	3.99E-05
Os02g0646200	-0.720963	1.05E-06
Os02g0648300	0.950698	2.43E-06
Os02g0649900	2.12733	5.60E-20
Os02g0651900	-1.44578	0.00119069
Os02g0658100	-0.665342	1.01E-73
Os02g0658500	0.53056	0.00135167
Os02g0663200	1.11994	0.0354337
Os02g0665300	-0.927386	0.0136522
Os02g0665800	-0.736196	7.30E-14
Os02g0671100	0.792749	2.80E-21
Os02g0676800	-1.61777	0.00605965
Os02g0687900	0.71011	1.54E-09
Os02g0699300	-0.562924	3.07E-05
Os02g0700300	0.778799	0.0078049
Os02g0711400	-0.504481	0.0218494
Os02g0721100	-1.30617	0.0325221
Os02g0724000	0.771097	6.59E-17
Os02g0731300	-1.59949	4.22E-18
Os02g0740400	-1.16068	2.35E-04
Os02g0745400	-0.749526	0.017646
Os02g0753000	-0.806273	2.39E-07
Os02g0753500	-0.929392	1.59E-04
Os02g0755600	0.517451	7.93E-04
Os02g0755900	-0.814274	0.00498422
Os02g0756200	0.721565	3.46E-12
Os02g0756600	0.622092	1.29E-07
Os02g0756850	-6.68216	6.76E-06
Os02g0758000	-1.58972	2.46E-35
Os02g0765400	-6.20292	9.42E-05
Os02g0765600	-8.81255	1.32E-11
Os02g0765900	-3.87406	9.69E-49
Os02g0765925	-4.70062	1.15E-20
Os02g0767200	-0.609933	1.95E-09
Os02g0771600	-0.671497	0.00211498
Os02g0773200	0.520793	0.0169187
Os02g0774100	0.795512	0.044833
Os02g0783700	-0.509882	2.26E-32
Os02g0790500	0.557776	3.95E-54
Os02g0791300	1.23541	3.78E-12
Os02g0791400	0.548755	5.73E-05
Os02g0802500	0.549728	5.07E-44
Os02g0805100	0.733476	4.07E-04
Os02g0811800	2.5248	2.09E-07
Os02g0812500	0.756501	0.00107922
Os02g0813166	0.702069	0.0386346
Os02g0813200	1.49143	0.0415804
Os02g0814000	-1.02776	2.88E-22
Os02g0818500	0.667734	0.00851549
Os02g0818900	0.754961	0.00926472
Os02g0819450	-2.55492	0.0355099
Os02g0820800	-0.53509	0.00512417
Os02g0823100	-0.894442	5.86E-89
Os02g0823400	0.551918	0.0373184
Os02g0830300	0.871289	1.86E-07
Os03g0103300	-0.91968	0.00251473
Os03g0103950	0.72476	0.00358561
Os03g0105500	8.32413	2.76E-10
Os03g0107700	0.727309	8.52E-07
Os03g0108600	0.601987	2.64E-06
Os03g0108800	0.669625	1.01E-04
Os03g0109300	-1.25877	0.0230827
Os03g0112900	-2.61491	0.0183928
Os03g0115800	11.5644	6.23E-69
Os03g0117800	0.653121	0.022604
Os03g0120900	-0.559043	0.0353629
Os03g0122300	-0.657047	2.67E-05
Os03g0131200	1.57864	0.00854333
Os03g0133000	1.04611	0.00522245
Os03g0140200	-1.34258	6.73E-15
Os03g0144300	-0.574154	0.00628347
Os03g0150800	-0.630114	1.58E-16
Os03g0151500	-2.09722	9.34E-04
Os03g0155900	-0.529032	0.00314161
Os03g0159400	0.53788	0.00949926
Os03g0163200	-0.532218	0.00584521
Os03g0171300	-0.7062	4.56E-04
Os03g0175800	0.805661	0.00637813
Os03g0178400	-0.529207	9.21E-05
Os03g0180800	-1.53759	0.00171301
Os03g0183100	0.50032	1.51E-09
Os03g0183200	0.888573	8.36E-38
Os03g0184100	0.974268	1.98E-23
Os03g0184550	0.673792	6.27E-21
Os03g0187400	0.595089	0.00860552
Os03g0188200	-0.693998	0.00145001
Os03g0191900	0.761471	0.00210971
Os03g0192500	0.63529	3.47E-68
Os03g0192550	1.05682	0.0294689
Os03g0194600	-0.933304	8.70E-07
Os03g0195100	-1.40727	0.00133548
Os03g0195800	-0.693234	2.62E-10
Os03g0195900	0.527222	0.00157765
Os03g0197175	-4.6924	0.00898935
Os03g0197850	1.01738	0.0155728
Os03g0198600	0.87771	2.11E-10
Os03g0201901	0.62645	9.29E-04
Os03g0206700	0.541605	0.0318186
Os03g0207400	0.613179	0.0398313
Os03g0218400	-0.631349	5.76E-10
Os03g0221200	-0.590338	0.00925032
Os03g0224300	0.621631	4.86E-24
Os03g0226200	1.14103	1.89E-198
Os03g0233000	0.985784	3.74E-17
Os03g0233900	1.04621	7.89E-175
Os03g0234000	2.24259	8.57E-08
Os03g0234100	0.870861	5.53E-06
Os03g0235000	-0.680554	1.07E-08
Os03g0237500	-1.28194	0.00674685
Os03g0239300	0.560652	3.37E-07
Os03g0242300	-0.75943	2.97E-11
Os03g0243700	-1.19121	0.00347596
Os03g0247200	0.555121	2.98E-09
Os03g0250000	-0.59227	0.00259087
Os03g0251000	-4.42031	0.00314629
Os03g0251700	0.547979	0.0030874
Os03g0257600	0.545471	5.55E-12
Os03g0258200	0.942236	1.15E-09
Os03g0259100	-0.582597	2.82E-05
Os03g0259600	1.56331	1.92E-05
Os03g0261100	0.66281	2.47E-06
Os03g0265900	0.747276	8.11E-15
Os03g0266300	-0.641764	9.71E-07
Os03g0266900	-1.68278	0.0430457
Os03g0276500	-1.76536	0
Os03g0277700	-1.21148	1.96E-07
Os03g0279700	-0.797911	0.00284362
Os03g0289800	-0.823593	0.00644557
Os03g0292100	0.595057	4.54E-11
Os03g0293000	-0.900123	6.47E-11
Os03g0299700	9.25662	7.02E-105
Os03g0300400	-0.501334	1.97E-38
Os03g0305400	1.26893	4.38E-07
Os03g0306700	-1.10448	1.15E-05
Os03g0306800	-1.52195	6.18E-04
Os03g0309400	7.73895	1.27E-08
Os03g0326200	0.588856	0.00301325
Os03g0329200	0.570848	0.00196381
Os03g0332100	-0.769337	1.51E-04
Os03g0332533	-0.758922	1.38E-11
Os03g0334000	-0.520046	1.07E-15
Os03g0334200	0.532887	5.44E-04
Os03g0335200	2.13847	4.85E-10
Os03g0342900	0.622876	2.90E-37
Os03g0357200	3.22835	1.49E-05
Os03g0360300	-0.827011	0.00584521
Os03g0363600	-0.555763	0.0187593
Os03g0368000	1.06522	7.26E-36
Os03g0368300	-1.53882	7.82E-104
Os03g0375900	-0.718201	0.0482507
Os03g0379500	7.64087	1.07E-34
Os03g0379650	-7.12325	5.60E-07
Os03g0386500	-0.828753	2.39E-04
Os03g0386800	-0.711476	0.0214522
Os03g0387900	-0.795794	5.17E-58
Os03g0388600	0.547668	0.00126586
Os03g0388900	-0.755927	8.86E-04
Os03g0392600	-0.831191	7.60E-11
Os03g0400700	1.09358	3.66E-04
Os03g0401100	0.564825	1.13E-73
Os03g0405200	8.29896	4.59E-14
Os03g0411100	0.859581	2.27E-21
Os03g0411800	0.618753	7.99E-07
Os03g0412400	1.19308	0.00670391
Os03g0417700	1.37844	5.21E-09
Os03g0431550	9.0704	1.84E-12
Os03g0432100	0.900184	4.31E-39
Os03g0438400	3.26468	1.81E-11
Os03g0445700	0.504244	0.00599434
Os03g0556500	5.5686	0.00131672
Os03g0556600	9.82244	8.63E-15
Os03g0557900	5.51614	0.00196152
Os03g0562400	-0.802468	0.00614598
Os03g0563200	0.732945	0.00702068
Os03g0572900	-0.602525	5.97E-12
Os03g0573001	-6.6233	1.14E-05
Os03g0579200	1.77222	0.0221405
Os03g0582000	0.505458	3.97E-24
Os03g0594100	-0.842273	0.0227459
Os03g0594900	-1.35222	7.92E-07
Os03g0608000	-1.27044	7.41E-05
Os03g0608700	0.682654	5.40E-20
Os03g0611100	0.79962	0.00792352
Os03g0614901	-0.65166	0.00396215
Os03g0621700	1.41516	0.0433242
Os03g0624300	-1.0563	2.25E-04
Os03g0629800	8.81705	5.52E-12
Os03g0634400	-1.34312	2.23E-17
Os03g0639300	-0.949768	0.0408246
Os03g0642300	0.907855	3.21E-04
Os03g0643700	-1.76821	4.15E-09
Os03g0651700	7.95076	3.55E-09
Os03g0652050	4.47705	1.03E-07
Os03g0654800	5.79699	5.92E-21
Os03g0655100	1.58797	0.0417365
Os03g0655400	2.77954	0
Os03g0655500	-1.41778	0.00122415
Os03g0660000	1.51929	0.00799847
Os03g0660050	2.62416	5.89E-06
Os03g0661800	1.25745	0.00740771
Os03g0663500	-1.15543	0.0419303
Os03g0663600	-0.778761	0.00119919
Os03g0667500	-0.649471	4.15E-10
Os03g0673400	-0.886951	3.62E-35
Os03g0673800	-0.59108	3.66E-05
Os03g0674700	0.996108	0.00125439
Os03g0684700	-0.782506	2.03E-12
Os03g0685300	-0.585999	1.74E-05
Os03g0701200	0.620056	7.44E-46
Os03g0709300	-0.735671	0.0177395
Os03g0711100	-1.1285	0.0025515
Os03g0718800	-1.10841	4.46E-18
Os03g0723600	0.55906	1.59E-08
Os03g0723700	0.648128	0.0366555
Os03g0723800	1.12478	3.75E-21
Os03g0726200	0.632501	2.18E-18
Os03g0745000	-3.31928	0.0233454
Os03g0747200	0.52101	4.64E-18
Os03g0747900	-0.530052	5.43E-12
Os03g0748700	-0.579818	1.83E-10
Os03g0758250	5.04752	0.00232227
Os03g0758900	0.571611	0.00511567
Os03g0760200	0.545195	1.80E-04
Os03g0777500	-0.93464	1.45E-22
Os03g0777600	-1.1011	8.50E-18
Os03g0777700	-0.67809	7.00E-44
Os03g0778000	-1.43398	1.13E-16
Os03g0786100	1.63577	9.43E-07
Os03g0787300	-0.625056	1.12E-39
Os03g0793800	-0.567738	0.00100529
Os03g0796900	0.659345	3.79E-18
Os03g0798500	-0.709809	7.21E-06
Os03g0804900	1.22615	2.33E-08
Os03g0809000	-1.0413	1.53E-101
Os03g0820300	-2.22127	0.0146873
Os03g0821200	1.31792	0.0164976
Os03g0822100	-0.529088	4.18E-04
Os03g0826800	0.796247	1.03E-94
Os03g0826900	1.577	2.64E-16
Os03g0832200	-0.551832	9.97E-05
Os03g0833500	0.597541	0.0432634
Os03g0836800	0.687463	4.45E-40
Os03g0854000	-0.79607	1.08E-05
Os03g0855500	1.10522	5.69E-09
Os03g0856700	-2.01478	8.29E-58
Os03g0861200	3.34052	5.67E-10
Os04g0103601	3.88091	3.02E-12
Os04g0103700	-1.5139	9.01E-45
Os04g0103800	-10.5706	2.40E-17
Os04g0110500	0.731593	0.00470489
Os04g0112200	-1.14952	1.26E-08
Os04g0113800	0.908314	7.66E-07
Os04g0115200	8.57521	6.13E-11
Os04g0115650	1.51762	3.45E-07
Os04g0115700	5.60953	7.44E-176
Os04g0116200	1.2155	2.57E-06
Os04g0117200	0.551502	0.00365091
Os04g0117600	0.713064	1.63E-21
Os04g0117900	1.21628	1.06E-27
Os04g0120300	-1.6509	1.05E-15
Os04g0121800	0.98044	0.0156812
Os04g0127200	0.938883	6.63E-18
Os04g0128001	-0.730029	0.00151866
Os04g0128700	1.81622	2.76E-09
Os04g0128900	0.845583	1.33E-14
Os04g0131850	-7.89623	4.97E-09
Os04g0136700	0.793678	2.04E-08
Os04g0142400	-1.27492	2.40E-15
Os04g0147200	0.836733	2.07E-08
Os04g0149400	1.05781	2.03E-04
Os04g0153000	5.18396	1.02E-85
Os04g0154800	-1.01037	0.0013818
Os04g0156200	-0.69077	0.0325744
Os04g0161400	-5.76212	6.88E-04
Os04g0166000	0.927644	1.19E-16
Os04g0169100	0.512692	1.53E-37
Os04g0172560	1.40538	2.64E-07
Os04g0174900	-2.13644	9.89E-08
Os04g0175400	1.13678	1.29E-07
Os04g0175600	-0.697532	0.011801
Os04g0178300	-1.03957	5.15E-21
Os04g0178400	-1.18564	1.72E-17
Os04g0179200	-1.52462	4.56E-05
Os04g0179700	-1.83852	3.92E-07
Os04g0180400	-1.88525	8.99E-09
Os04g0185100	-0.648549	0.0145371
Os04g0188500	-0.77439	2.25E-21
Os04g0191600	0.987675	3.38E-04
Os04g0201800	-3.86782	5.41E-09
Os04g0201900	-1.20742	0.0157061
Os04g0202200	0.555515	0.00479909
Os04g0202500	-4.76223	0.0287386
Os04g0204300	1.39971	0.00344522
Os04g0209200	-0.646329	0.0174607
Os04g0223500	-0.687329	2.70E-04
Os04g0229100	0.829912	0.00109741
Os04g0234600	2.0297	0.0337815
Os04g0249700	0.567274	6.39E-04
Os04g0290400	1.4548	1.35E-16
Os04g0308600	0.855651	3.15E-06
Os04g0309600	-0.748466	0.00917453
Os04g0319700	2.90697	7.72E-05
Os04g0340100	4.6702	0.0352394
Os04g0340300	-1.20842	3.45E-31
Os04g0350100	0.757505	6.53E-12
Os04g0356600	-0.603004	0.00251805
Os04g0358000	-0.522043	8.68E-08
Os04g0367000	-0.901054	0.0481261
Os04g0387300	2.1548	7.58E-21
Os04g0390800	7.8596	5.43E-09
Os04g0395651	-4.76536	0.032873
Os04g0397800	5.94898	6.20E-05
Os04g0399300	0.590541	5.12E-07
Os04g0402100	-0.53442	3.45E-72
Os04g0404400	-1.15937	0.0473314
Os04g0405300	-1.4088	0.0299471
Os04g0411400	0.962509	6.62E-04
Os04g0412500	-3.11919	8.50E-12
Os04g0417800	-0.693921	1.93E-08
Os04g0420900	-0.812454	0.0165522
Os04g0422300	-1.68015	0.0189979
Os04g0423400	-1.51304	1.46E-12
Os04g0430700	-0.508151	1.88E-04
Os04g0435100	-0.594021	8.70E-04
Os04g0444300	0.522062	1.52E-08
Os04g0445000	-0.741409	8.04E-17
Os04g0445100	-1.00439	9.34E-07
Os04g0448300	-0.563756	0.00169353
Os04g0449200	1.39589	1.62E-08
Os04g0452600	-0.861325	0.00130051
Os04g0453233	-0.963461	2.50E-06
Os04g0457300	-1.35449	0.00200209
Os04g0459500	2.25792	0.0156485
Os04g0460900	0.645514	3.97E-07
Os04g0461700	-0.997667	3.95E-04
Os04g0463000	-0.598842	5.82E-04
Os04g0469800	-0.511374	9.91E-06
Os04g0472200	-0.719119	1.15E-06
Os04g0472300	-0.577038	1.42E-08
Os04g0479900	-0.81158	0.0156029
Os04g0490500	0.593825	0.0472263
Os04g0491500	0.575287	2.60E-08
Os04g0494800	-0.890341	4.18E-04
Os04g0497000	0.812311	0.0270601
Os04g0498900	1.50339	3.25E-05
Os04g0506700	-0.520324	0.0296362
Os04g0509600	-0.864171	1.48E-36
Os04g0515900	1.07399	1.03E-21
Os04g0516600	-1.83379	9.89E-08
Os04g0521100	-0.874646	2.19E-80
Os04g0523650	-1.47286	0.00217667
Os04g0525850	1.70098	0.0191826
Os04g0526300	0.76518	5.24E-04
Os04g0526800	-0.784356	1.64E-18
Os04g0532800	-0.548828	0.0408175
Os04g0538400	2.44615	4.74E-05
Os04g0538750	1.07178	0.0183377
Os04g0542800	-0.748606	1.28E-37
Os04g0543900	0.97546	8.33E-177
Os04g0546800	0.549181	7.84E-14
Os04g0550866	-0.820397	2.70E-04
Os04g0550900	-0.73476	2.20E-04
Os04g0556500	0.685048	3.17E-06
Os04g0556600	4.8482	0.0183529
Os04g0565500	0.789208	9.44E-07
Os04g0567200	0.561046	8.98E-06
Os04g0577337	1.52461	0.0297862
Os04g0580001	5.71571	4.35E-90
Os04g0581600	-0.879558	0.0423023
Os04g0583200	0.516708	3.16E-15
Os04g0583900	0.904857	0.0309925
Os04g0584900	0.584662	0.0192711
Os04g0585100	0.574576	4.87E-11
Os04g0585200	-0.623447	6.85E-04
Os04g0589700	-0.52206	0.0234442
Os04g0596500	-1.33811	7.19E-04
Os04g0604300	-0.776744	0.0324265
Os04g0606200	0.637192	1.22E-05
Os04g0610400	0.631011	4.95E-05
Os04g0614650	-0.571812	3.46E-24
Os04g0614700	-0.772651	3.94E-09
Os04g0616900	0.688706	1.69E-06
Os04g0617050	1.26282	0.0108868
Os04g0619450	-4.8466	0.00652588
Os04g0629200	0.5795	4.03E-13
Os04g0629600	0.707873	0.0225336
Os04g0634000	1.25766	5.39E-05
Os04g0634400	-0.568095	5.20E-04
Os04g0636750	-0.539405	2.16E-04
Os04g0639700	-1.1095	0.0249098
Os04g0645100	-0.643198	6.08E-14
Os04g0645200	0.936181	0.0491552
Os04g0645700	0.731378	5.93E-06
Os04g0649000	2.29105	1.23E-06
Os04g0650700	-1.15244	6.67E-22
Os04g0651000	-1.59798	6.69E-08
Os04g0653600	0.706504	2.34E-06
Os04g0659200	-0.688593	1.98E-20
Os04g0659300	-0.659912	6.76E-10
Os04g0661100	-4.16412	0.0436254
Os04g0667600	0.552864	1.99E-06
Os04g0674800	-0.800379	9.20E-18
Os04g0675400	1.31292	0.0178135
Os04g0677100	-1.10155	8.25E-05
Os04g0678400	-0.522811	0.00389964
Os04g0679400	0.529623	4.03E-53
Os04g0683600	-0.507107	4.92E-07
Os04g0683900	0.570392	0.00111528
Os04g0685500	0.886215	0.00137713
Os04g0688200	0.565902	3.78E-09
Os04g0693400	-0.564454	0.0169123
Os05g0100100	2.91262	9.00E-11
Os05g0103800	-5.85602	1.94E-18
Os05g0104200	-0.687986	0.0456247
Os05g0106200	-0.770352	3.13E-04
Os05g0110100	0.597426	0.00804501
Os05g0111800	-1.19411	1.06E-09
Os05g0112900	0.877315	0.0148807
Os05g0114400	-0.723476	3.62E-07
Os05g0119000	-0.562506	5.42E-14
Os05g0123100	-0.563216	1.75E-20
Os05g0130100	0.976233	4.59E-04
Os05g0132100	-0.649054	0.00265518
Os05g0138000	0.644565	0.0110027
Os05g0139100	-0.596249	0.0251535
Os05g0142200	0.574657	0.0232841
Os05g0148000	-0.505372	0.00306366
Os05g0148700	-1.00441	0.00147824
Os05g0148800	0.545957	0.0178219
Os05g0153300	-1.05896	3.97E-14
Os05g0156500	-0.519503	5.80E-09
Os05g0158600	1.12873	8.48E-07
Os05g0167300	-1.38067	0.0398133
Os05g0179100	-0.729465	1.16E-08
Os05g0180300	-0.620847	0.0104798
Os05g0181300	1.66876	0.0264252
Os05g0181650	1.8078	1.91E-07
Os05g0181700	1.40856	9.86E-33
Os05g0186300	0.701838	1.40E-11
Os05g0188100	0.538664	2.16E-26
Os05g0194900	-2.24114	1.81E-05
Os05g0200400	-0.519653	3.25E-05
Os05g0200700	1.20785	0.00628983
Os05g0202500	-2.5917	2.13E-05
Os05g0206100	-1.29953	0.0491828
Os05g0213900	-0.784717	4.99E-19
Os05g0215700	0.550996	1.48E-05
Os05g0217000	-0.826693	1.38E-15
Os05g0217700	-1.06801	2.14E-10
Os05g0219900	-0.545306	0.0409027
Os05g0231100	-1.58433	7.73E-27
Os05g0246300	0.784637	0.00275798
Os05g0258400	-0.648723	2.88E-19
Os05g0261700	0.525159	7.23E-05
Os05g0269100	0.51506	7.91E-10
Os05g0276500	-0.523476	2.56E-12
Os05g0296200	6.93151	1.65E-06
Os05g0302600	-0.543423	0.0077499
Os05g0311500	-0.612264	5.45E-15
Os05g0320700	-0.613338	1.74E-46
Os05g0320750	-0.909499	1.62E-11
Os05g0320800	-0.808105	0.00157526
Os05g0322900	0.688954	4.59E-10
Os05g0324700	1.20171	0.0161723
Os05g0325200	-1.13222	9.88E-04
Os05g0344200	0.796839	1.61E-68
Os05g0358500	-0.593734	2.63E-14
Os05g0359500	-0.617446	4.63E-05
Os05g0359966	-0.729666	6.63E-04
Os05g0360400	-0.661349	5.33E-25
Os05g0369900	1.01598	0.001176
Os05g0374000	-0.847864	0.00521488
Os05g0375532	1.38618	0.014881
Os05g0380200	0.516195	0.00964825
Os05g0380300	0.534579	0.00715346
Os05g0382500	-2.28538	0.0266126
Os05g0389000	0.661044	4.18E-10
Os05g0390800	-1.0957	0.0120383
Os05g0390932	0.578378	4.53E-04
Os05g0401500	-1.15218	3.33E-04
Os05g0402900	0.603871	2.92E-08
Os05g0403300	-1.04752	4.96E-05
Os05g0406100	1.0574	2.57E-06
Os05g0407100	-1.40326	0.0112572
Os05g0412800	0.651622	0.00741193
Os05g0420000	0.911488	9.98E-11
Os05g0424000	-0.77898	5.63E-10
Os05g0425000	1.04036	1.26E-13
Os05g0427400	-0.656232	1.13E-18
Os05g0429900	-0.558442	1.11E-04
Os05g0431700	-0.867498	3.75E-17
Os05g0440300	2.90387	4.87E-05
Os05g0442400	-2.9037	0.043711
Os05g0443900	0.629781	3.13E-17
Os05g0454500	0.93222	1.39E-75
Os05g0455400	-0.505858	1.96E-12
Os05g0456925	-1.288	6.57E-17
Os05g0468700	-0.594608	0.00258636
Os05g0474800	0.688788	4.00E-04
Os05g0488600	-1.65351	4.89E-11
Os05g0491200	0.720232	2.59E-35
Os05g0494100	0.603361	4.35E-04
Os05g0495300	-0.557185	0.018359
Os05g0499300	-0.61838	1.50E-60
Os05g0503500	-0.737287	1.81E-11
Os05g0503650	-0.981486	5.00E-24
Os05g0518200	0.735349	0.0152449
Os05g0521700	-1.36994	6.83E-13
Os05g0524100	0.546188	0.013245
Os05g0525800	-0.85946	0.0199666
Os05g0525900	0.950845	3.07E-30
Os05g0526200	0.640866	0.00410342
Os05g0528701	-0.77839	1.12E-05
Os05g0534400	-0.944506	0.0177949
Os05g0535566	-0.547723	8.96E-05
Os05g0537100	1.41623	3.79E-09
Os05g0542150	0.613654	0.00611606
Os05g0552200	-0.56691	0.0160771
Os05g0552700	3.54239	5.33E-31
Os05g0555600	0.998526	8.71E-05
Os05g0562300	-1.15548	1.34E-09
Os05g0563300	5.04827	0.00261538
Os05g0563550	-0.673784	3.15E-23
Os05g0573300	0.604075	1.17E-33
Os05g0579600	-2.04637	6.66E-04
Os05g0580200	6.99066	1.05E-06
Os05g0582600	0.980133	3.42E-04
Os05g0584600	-0.91375	1.60E-83
Os05g0586500	-0.543319	4.12E-04
Os05g0591925	-7.48766	1.79E-07
Os06g0108500	1.67532	0.0484058
Os06g0108600	-0.600535	0.0115986
Os06g0110000	1.17516	9.60E-11
Os06g0115700	-1.02157	2.67E-08
Os06g0125000	-0.954215	1.97E-24
Os06g0125132	-0.596099	9.60E-06
Os06g0125500	-0.62664	0.00117394
Os06g0126500	-0.646846	1.38E-37
Os06g0127700	-0.517299	0.00436256
Os06g0128800	0.843751	0.0215017
Os06g0129400	0.605441	1.19E-51
Os06g0131100	-0.509817	9.72E-04
Os06g0135300	5.28411	0.00465462
Os06g0139800	-0.569748	0.00463728
Os06g0141400	7.02985	2.67E-07
Os06g0142200	1.23064	5.32E-14
Os06g0142300	0.937642	0.00286067
Os06g0142400	1.66123	0.0198176
Os06g0142625	-1.651	2.92E-06
Os06g0147300	0.85565	0.0173414
Os06g0153000	-0.566142	0.0109582
Os06g0155500	-0.783826	0.00706018
Os06g0158800	-0.706565	0.0135238
Os06g0166500	0.754579	5.32E-11
Os06g0172800	0.715724	3.35E-66
Os06g0179400	-0.606345	4.05E-04
Os06g0190700	1.17734	3.23E-05
Os06g0192100	1.51097	0.0398133
Os06g0192400	-0.707583	6.60E-05
Os06g0200700	1.66836	7.57E-04
Os06g0200800	3.0727	6.82E-103
Os06g0202600	2.08596	6.32E-05
Os06g0206700	1.17043	4.23E-07
Os06g0207950	2.03268	0.00466308
Os06g0215600	-0.521792	1.34E-13
Os06g0216200	-0.928905	0.0427303
Os06g0217300	-1.17746	1.57E-06
Os06g0219900	-1.60266	0.0430362
Os06g0220500	0.656653	7.53E-05
Os06g0220600	-0.627628	5.79E-04
Os06g0226000	-0.673058	1.50E-12
Os06g0232600	-0.697388	0.0254013
Os06g0238000	-0.543953	8.32E-04
Os06g0239500	0.628443	4.73E-17
Os06g0241100	0.985354	0.0161185
Os06g0247000	-1.29311	0.0377242
Os06g0253100	-2.32919	0.0109949
Os06g0255900	0.736319	0.0103967
Os06g0256900	0.644174	0.0363887
Os06g0266400	-0.604023	0.00192069
Os06g0268500	1.22929	1.20E-04
Os06g0268600	-2.26469	0.0144931
Os06g0271500	-1.23362	1.40E-72
Os06g0294200	0.532294	0.00234887
Os06g0295366	1.95055	2.10E-07
Os06g0298200	0.768583	1.19E-22
Os06g0314000	-1.15054	0.0064413
Os06g0316300	-1.38867	5.62E-07
Os06g0317200	-5.76096	6.88E-04
Os06g0320500	-0.783069	3.88E-04
Os06g0329200	0.795288	4.12E-05
Os06g0338700	-0.50128	0.00329183
Os06g0348800	-1.93763	7.53E-06
Os06g0349800	0.804849	2.72E-07
Os06g0355701	-3.57986	3.45E-04
Os06g0363000	2.61396	2.01E-07
Os06g0470350	0.968321	1.38E-11
Os06g0475400	-0.884088	2.05E-19
Os06g0476200	5.84862	3.78E-04
Os06g0480000	0.503118	5.25E-06
Os06g0486800	0.519656	3.49E-67
Os06g0487380	1.17387	0.043493
Os06g0490400	-0.742678	0.00676659
Os06g0493600	1.52526	0.00316728
Os06g0494000	-0.535596	1.66E-05
Os06g0495500	0.865287	0.0110806
Os06g0496800	0.633964	1.36E-09
Os06g0498800	0.959519	0.0131532
Os06g0499100	-0.537841	0.00241318
Os06g0510200	2.77568	0.00197062
Os06g0513050	2.03273	4.95E-30
Os06g0513781	0.671135	2.57E-17
Os06g0513862	0.671135	2.57E-17
Os06g0513943	1.24163	2.39E-166
Os06g0514100	1.04704	3.59E-189
Os06g0517500	-1.21124	0.00650776
Os06g0532500	-1.29575	6.58E-04
Os06g0534200	-0.802987	1.91E-07
Os06g0536100	-0.660455	0.00232041
Os06g0542300	0.55577	4.12E-05
Os06g0543400	-0.716554	0.00618354
Os06g0548200	-0.543165	0.00127029
Os06g0558900	0.565441	0.0360104
Os06g0559400	0.588277	1.49E-11
Os06g0559600	8.93419	2.64E-12
Os06g0562200	-0.784219	0.00274418
Os06g0564700	1.00186	0.00665488
Os06g0565100	-0.63004	7.21E-04
Os06g0567200	-0.902481	2.41E-07
Os06g0567900	-1.52457	0.0172347
Os06g0568600	-0.784017	2.01E-04
Os06g0569500	-1.84122	9.97E-05
Os06g0573600	0.51883	2.10E-46
Os06g0574550	-2.31941	0.0405487
Os06g0579100	0.76854	0.00549127
Os06g0579600	1.07263	6.05E-04
Os06g0581300	-0.563242	2.18E-06
Os06g0591400	-1.19658	5.19E-09
Os06g0593100	-0.535577	2.37E-10
Os06g0594400	0.501374	9.76E-09
Os06g0598800	-0.588307	3.90E-12
Os06g0599200	-2.52307	1.27E-08
Os06g0603600	-0.696587	1.07E-06
Os06g0604300	-0.6188	1.68E-06
Os06g0606700	-0.740316	0.00568514
Os06g0607200	-0.511823	0.0162939
Os06g0610800	-0.833742	6.12E-05
Os06g0611200	0.849493	0.0276357
Os06g0618700	-0.666783	1.17E-21
Os06g0625700	0.979057	1.53E-06
Os06g0626200	0.698287	9.62E-04
Os06g0646700	0.618642	8.22E-05
Os06g0649600	0.521297	1.15E-05
Os06g0651000	0.536507	0.00103553
Os06g0653000	-3.90557	0.0231333
Os06g0656000	1.85048	0.0316573
Os06g0661766	0.826504	2.45E-40
Os06g0662150	-1.40654	0.00406965
Os06g0663450	0.598123	2.13E-05
Os06g0664100	0.556905	9.42E-08
Os06g0666400	1.30003	3.87E-08
Os06g0666800	1.13884	1.04E-14
Os06g0673800	1.65784	5.96E-11
Os06g0676300	-0.607603	0.032065
Os06g0676700	0.51471	6.16E-12
Os06g0680500	-0.533601	8.45E-06
Os06g0681400	0.519798	6.08E-76
Os06g0682633	-0.513558	0.00113793
Os06g0683000	0.637632	0.0322765
Os06g0692300	-0.577001	0.00133836
Os06g0692500	-0.544592	0.00174329
Os06g0692600	-1.03929	1.25E-09
Os06g0695700	-0.566941	7.63E-04
Os06g0701700	-0.676779	2.04E-04
Os06g0701900	-0.505553	0.0458012
Os06g0702000	-0.616462	0.0299282
Os06g0703400	-5.86036	5.90E-04
Os06g0707300	1.09763	1.77E-19
Os06g0710300	0.916039	1.48E-08
Os06g0710700	-0.666577	6.84E-04
Os06g0711700	-0.598648	0.0421804
Os06g0712700	-0.72516	6.32E-05
Os06g0712900	-0.548721	0.0374966
Os06g0713800	0.918367	7.04E-06
Os06g0714300	-0.708173	1.90E-14
Os06g0714366	-0.846329	0.00210024
Os06g0714600	-0.64748	8.77E-05
Os06g0717200	-0.537167	5.89E-04
Os06g0718400	-0.81685	1.20E-10
Os06g0721800	-0.953641	1.59E-11
Os06g0724000	-0.505533	5.65E-17
Os06g0725100	-0.557874	4.42E-14
Os06g0725200	-1.50505	0.0174633
Os06g0728700	-2.05945	1.18E-14
Os06g0730200	0.586296	0.0481545
Os07g0100800	-1.2001	1.18E-10
Os07g0101000	-0.684684	0.045217
Os07g0102200	1.0211	8.46E-07
Os07g0103000	5.56942	0.00135361
Os07g0103100	-0.561739	1.40E-05
Os07g0103500	4.57669	1.60E-06
Os07g0103600	2.90967	1.26E-13
Os07g0104366	-1.24887	0.015279
Os07g0105000	-1.29792	3.80E-40
Os07g0106700	0.546186	0.0251276
Os07g0110000	1.27744	1.93E-41
Os07g0117300	-2.38017	3.31E-04
Os07g0118300	-0.821358	3.16E-10
Os07g0124600	0.532486	1.26E-08
Os07g0124900	-0.501878	1.54E-47
Os07g0125000	-0.866749	1.94E-19
Os07g0125500	-0.501878	1.54E-47
Os07g0125600	-0.866749	1.94E-19
Os07g0126301	-0.501878	1.54E-47
Os07g0126401	-0.866749	1.94E-19
Os07g0127600	-0.651719	0.0433886
Os07g0128800	1.37789	0.0442457
Os07g0129200	-0.927183	6.57E-17
Os07g0129300	1.05362	7.98E-83
Os07g0129700	-3.27867	5.90E-90
Os07g0129800	-3.52072	2.79E-08
Os07g0129900	-1.22196	0.02879
Os07g0131250	1.64209	0.00172157
Os07g0131600	2.34577	6.32E-16
Os07g0131725	-1.75427	2.50E-04
Os07g0136800	-3.29975	9.55E-09
Os07g0137000	-3.44546	3.81E-07
Os07g0137200	-5.04426	1.12E-16
Os07g0137600	-3.57739	8.34E-05
Os07g0143600	0.629519	0.00340737
Os07g0147500	-0.779592	0.0119684
Os07g0147700	-0.525088	0.0239181
Os07g0150901	0.586081	0.00957329
Os07g0151800	1.37706	1.54E-04
Os07g0153150	4.75534	0.00665249
Os07g0153300	-1.18914	7.74E-05
Os07g0153400	-1.83822	0
Os07g0158900	1.20688	2.81E-105
Os07g0159200	7.75075	1.21E-08
Os07g0162500	-1.30752	0.00222857
Os07g0162600	0.654644	2.69E-04
Os07g0168000	0.560752	0.0205903
Os07g0175300	0.519073	0.00913374
Os07g0176200	0.526618	6.55E-20
Os07g0176600	0.63694	2.42E-08
Os07g0180300	1.6086	4.11E-35
Os07g0181800	0.752663	2.47E-14
Os07g0187000	-1.03521	5.44E-04
Os07g0190000	-1.10584	2.31E-10
Os07g0192000	1.02815	4.45E-26
Os07g0194800	-0.620268	1.13E-06
Os07g0197400	-0.757205	0.00342137
Os07g0197500	1.31808	6.30E-07
Os07g0200900	0.713875	0.032047
Os07g0208533	-0.53214	4.99E-04
Os07g0213500	1.26187	7.23E-23
Os07g0214300	-3.08616	9.25E-10
Os07g0214600	-5.33046	1.64E-07
Os07g0214900	6.34507	4.15E-05
Os07g0215200	8.98988	1.79E-12
Os07g0215500	-7.61245	2.98E-08
Os07g0220600	1.82535	5.76E-23
Os07g0221300	3.09954	0.00202016
Os07g0223100	0.545403	3.02E-37
Os07g0223766	-0.528739	0.0127668
Os07g0225300	0.812717	6.25E-11
Os07g0229700	0.958596	2.39E-05
Os07g0241800	0.520848	0.00475861
Os07g0242050	1.62493	0.00818031
Os07g0248550	2.95586	5.54E-08
Os07g0248600	3.66449	1.39E-13
Os07g0248800	1.305	4.15E-55
Os07g0248900	1.04708	2.71E-11
Os07g0268400	0.597917	0.0496528
Os07g0290200	-1.16145	2.21E-10
Os07g0294100	0.801822	5.10E-06
Os07g0294300	1.74246	4.26E-15
Os07g0297400	1.34608	6.36E-79
Os07g0414800	-0.515391	0.034578
Os07g0414900	0.96913	0.0246898
Os07g0416700	-4.70554	8.51E-09
Os07g0418500	2.01422	3.93E-13
Os07g0418600	0.970043	1.49E-04
Os07g0418700	1.81544	0.00664226
Os07g0419200	-0.650081	4.22E-05
Os07g0430501	0.579174	0.0108203
Os07g0431160	-2.00833	0.0214522
Os07g0432201	-1.69147	0
Os07g0432333	0.663321	3.53E-85
Os07g0442800	-1.76784	1.61E-19
Os07g0448150	-10.6971	9.12E-18
Os07g0448200	-1.86598	1.20E-18
Os07g0448400	-0.921058	7.50E-04
Os07g0449100	1.52737	1.90E-63
Os07g0450000	1.97577	4.56E-50
Os07g0450100	2.85842	5.73E-07
Os07g0451201	-4.658	1.49E-21
Os07g0451300	6.15597	1.03E-04
Os07g0452100	-4.74623	0.0076823
Os07g0457200	2.40518	0.00974188
Os07g0457300	0.782631	5.36E-13
Os07g0466000	-0.886529	1.72E-05
Os07g0475900	0.801157	1.09E-40
Os07g0499500	-0.573163	1.26E-07
Os07g0509800	-1.85764	7.38E-43
Os07g0510400	1.21289	5.47E-20
Os07g0510500	-1.43632	2.97E-11
Os07g0510800	6.95214	1.30E-06
Os07g0511400	6.02122	5.85E-104
Os07g0514400	-0.818541	0.0250691
Os07g0515200	8.44129	1.29E-10
Os07g0515700	4.77789	8.50E-06
Os07g0515900	-0.970451	0.0413148
Os07g0516050	1.4268	1.88E-39
Os07g0516500	0.616436	2.04E-12
Os07g0517100	-1.719	5.17E-58
Os07g0517900	-0.943973	0.00216167
Os07g0518200	5.08431	0.0022089
Os07g0518500	1.02821	6.95E-13
Os07g0519100	3.92805	8.60E-114
Os07g0519300	1.6802	4.67E-77
Os07g0519600	2.32576	1.06E-60
Os07g0520100	1.86003	1.29E-178
Os07g0520200	5.76489	8.47E-04
Os07g0521000	1.30693	3.04E-43
Os07g0521100	2.26426	6.04E-07
Os07g0521300	3.92062	4.45E-46
Os07g0521400	8.53021	7.41E-11
Os07g0521500	9.48309	9.99E-14
Os07g0521600	11.0414	7.29E-19
Os07g0521800	9.39967	1.14E-13
Os07g0522600	0.94091	1.09E-35
Os07g0523100	-3.93315	0
Os07g0523150	-0.559266	9.49E-18
Os07g0523300	1.09311	3.07E-30
Os07g0523400	6.79851	3.70E-09
Os07g0523500	1.09311	3.07E-30
Os07g0523600	6.24457	1.45E-07
Os07g0523700	1.09311	3.07E-30
Os07g0523965	6.24457	1.45E-07
Os07g0524000	-0.934141	3.28E-09
Os07g0524900	1.04229	1.44E-07
Os07g0526400	-3.9045	0.0169718
Os07g0529000	-3.59343	6.66E-25
Os07g0531500	-0.72944	0.00517417
Os07g0533300	-0.641613	0.00493991
Os07g0535100	0.705187	0.0225597
Os07g0537900	-0.549265	0.00278115
Os07g0538000	0.962183	5.06E-25
Os07g0541800	0.866485	6.54E-05
Os07g0542900	-0.743697	2.74E-07
Os07g0553400	-0.511208	8.44E-05
Os07g0553450	-1.27122	9.49E-04
Os07g0556000	-0.937607	3.23E-05
Os07g0556200	-0.687424	0.00355625
Os07g0559700	0.533	5.70E-17
Os07g0562700	-0.854462	0.0237889
Os07g0565600	0.503509	0.00693556
Os07g0573450	-5.65689	0.00123157
Os07g0580700	2.28449	5.87E-17
Os07g0580766	2.18191	2.67E-05
Os07g0581700	0.623448	0.00347938
Os07g0584100	0.655215	6.14E-21
Os07g0585900	0.619114	0.0476068
Os07g0588400	-0.60438	8.60E-05
Os07g0590700	-0.539826	7.06E-19
Os07g0591700	2.01157	9.42E-13
Os07g0597400	1.46423	1.48E-28
Os07g0604600	3.03266	3.40E-06
Os07g0609550	0.784904	0.0168836
Os07g0611500	-1.27504	1.71E-17
Os07g0613600	0.559882	0.014913
Os07g0619200	-0.530646	7.21E-06
Os07g0624100	-0.618597	0.0127436
Os07g0624600	-1.71936	4.02E-05
Os07g0624700	-0.502751	5.30E-16
Os07g0628500	-0.551349	3.13E-05
Os07g0628700	2.79245	3.29E-04
Os07g0628900	5.52848	3.62E-04
Os07g0631200	-2.84467	1.90E-04
Os07g0631900	0.869583	5.20E-11
Os07g0635200	-0.620964	0.00972328
Os07g0638500	-0.554298	1.15E-05
Os07g0638600	-0.509256	2.79E-04
Os07g0639400	-0.809936	1.23E-19
Os07g0643400	-0.634255	0.0150515
Os07g0643800	0.867985	1.14E-09
Os07g0648000	-0.625939	1.80E-06
Os07g0654700	-1.43737	1.87E-38
Os07g0663700	-2.26613	0.00618354
Os07g0664200	-0.739854	7.53E-24
Os07g0665100	3.60297	0.0429103
Os07g0673400	1.86142	0.00229738
Os07g0676700	0.706961	0.0199414
Os07g0677100	-1.6917	8.65E-32
Os07g0678300	-0.966313	5.69E-08
Os07g0685300	-0.940014	0.0234567
Os07g0686800	1.34262	5.03E-06
Os07g0691200	0.830269	1.17E-29
Os07g0694700	-0.509688	9.35E-64
Os08g0100300	-2.71836	9.56E-07
Os08g0104900	-0.627323	2.30E-06
Os08g0106300	2.16464	0.0247747
Os08g0106501	-0.752879	3.05E-04
Os08g0108001	5.15521	0.00705493
Os08g0108300	-0.503558	0.0212478
Os08g0109800	-0.594403	5.67E-04
Os08g0111300	-0.556685	4.30E-06
Os08g0113000	-1.0869	1.70E-55
Os08g0114300	-0.545328	3.22E-18
Os08g0115200	0.577537	0.00296657
Os08g0120500	0.581041	1.69E-43
Os08g0120600	-0.610218	0.00274764
Os08g0130400	0.698867	0.00755347
Os08g0132600	-0.504901	1.48E-04
Os08g0137400	-0.824454	0.0384123
Os08g0141400	-0.808117	6.00E-13
Os08g0145600	0.65428	0.00518842
Os08g0152800	0.525932	1.07E-21
Os08g0155900	-0.781181	0.0233388
Os08g0156100	-1.11715	0.0257402
Os08g0156600	-0.518835	6.55E-04
Os08g0157600	-0.679803	1.85E-10
Os08g0167000	-0.738677	4.58E-25
Os08g0171700	-0.513854	0.00113417
Os08g0173600	0.913153	0.0266007
Os08g0189100	0.980276	1.41E-05
Os08g0189400	3.75941	6.95E-16
Os08g0189600	-1.36724	4.11E-169
Os08g0189850	-0.769261	1.47E-04
Os08g0190100	-0.615347	7.78E-16
Os08g0191000	-0.590155	1.86E-24
Os08g0191400	3.4494	0.0118016
Os08g0191600	0.770518	1.54E-49
Os08g0196700	-0.591399	0.00107986
Os08g0200100	-1.23574	0.00204172
Os08g0200300	1.05967	0.001087
Os08g0201100	0.647833	0.0332317
Os08g0203300	0.528536	4.34E-25
Os08g0203350	6.69459	1.43E-06
Os08g0205800	0.748819	0.0456109
Os08g0214900	0.914269	0.00218212
Os08g0224800	-0.532156	3.31E-09
Os08g0232700	1.70152	0.0199192
Os08g0237100	-0.608031	0.00108597
Os08g0239000	-2.25151	0.00429465
Os08g0239300	-0.95255	3.04E-127
Os08g0240000	-2.74736	3.68E-09
Os08g0240200	-9.65768	3.38E-19
Os08g0240500	0.73773	0.024965
Os08g0243500	-0.648629	7.92E-26
Os08g0245200	-0.900411	9.46E-42
Os08g0246100	-0.50947	3.27E-08
Os08g0249000	-2.08205	6.24E-05
Os08g0254600	0.519721	2.45E-08
Os08g0260800	-7.31787	4.11E-47
Os08g0269000	1.20339	1.08E-05
Os08g0277300	5.00981	0.010533
Os08g0278900	-0.606265	5.73E-08
Os08g0280300	5.28573	0.00387977
Os08g0316900	0.755523	0.00259824
Os08g0327100	0.64331	2.02E-21
Os08g0331000	-0.503008	1.11E-05
Os08g0335500	-0.992451	0.0215017
Os08g0340700	6.51377	3.79E-06
Os08g0343000	0.771419	4.68E-04
Os08g0345800	0.632734	2.16E-07
Os08g0357300	-0.672358	6.66E-12
Os08g0358050	1.84462	0.0025421
Os08g0374000	-0.733726	1.11E-35
Os08g0376500	-0.87961	0.00174329
Os08g0376550	-0.950165	0.029965
Os08g0376600	-0.512145	0.0181772
Os08g0388900	3.93231	0.00140231
Os08g0389601	7.23789	2.65E-07
Os08g0391800	-1.45039	0.0372773
Os08g0394000	0.8442	4.37E-04
Os08g0396700	-0.816366	0.0486518
Os08g0398300	-0.551395	1.02E-28
Os08g0404900	-4.75938	0.0275678
Os08g0406700	8.01048	2.26E-09
Os08g0407600	-0.648182	2.10E-06
Os08g0409100	-1.06258	1.41E-32
Os08g0410900	-7.81796	3.06E-09
Os08g0410950	-6.679	8.25E-06
Os08g0411000	-5.12243	0.0084842
Os08g0411800	0.529093	0.00621009
Os08g0416800	-1.08127	2.35E-13
Os08g0417100	-0.587834	1.52E-15
Os08g0421825	0.503688	0.0218211
Os08g0424100	1.97985	6.01E-17
Os08g0424200	-0.570405	1.34E-18
Os08g0424700	-1.04249	6.65E-05
Os08g0431700	-0.671509	8.50E-05
Os08g0434100	-0.511861	1.58E-07
Os08g0451200	0.805177	2.62E-10
Os08g0451800	-4.75601	0.0335727
Os08g0453200	0.515875	1.40E-21
Os08g0458200	0.793384	1.18E-11
Os08g0462900	-0.541929	5.09E-13
Os08g0468100	-0.985471	7.29E-56
Os08g0473900	-1.92657	0.00796578
Os08g0474000	-4.45158	0.0186533
Os08g0475100	-2.0379	3.89E-07
Os08g0476900	1.88589	1.12E-33
Os08g0477100	0.507928	4.79E-07
Os08g0481400	-0.557088	2.72E-04
Os08g0482600	0.784277	5.91E-05
Os08g0496700	6.05401	5.21E-07
Os08g0498400	1.15554	4.49E-04
Os08g0500700	-0.937107	1.22E-173
Os08g0500800	-0.602267	7.80E-24
Os08g0501500	-0.787338	2.15E-04
Os08g0503700	-0.602441	1.79E-09
Os08g0509100	-1.12275	0.0339766
Os08g0509600	0.834123	7.05E-06
Os08g0519100	-0.655035	7.81E-08
Os08g0529100	-0.575472	0.00628347
Os08g0529800	-0.522095	1.67E-04
Os08g0532700	-0.608381	6.52E-09
Os08g0534400	1.70437	4.26E-08
Os08g0535800	-0.553687	1.27E-14
Os08g0536350	-0.828044	9.88E-05
Os08g0546800	-1.36783	0.00238841
Os08g0547300	1.49872	7.91E-14
Os08g0556300	-0.6965	1.34E-23
Os08g0557900	0.504245	1.19E-38
Os08g0559000	-0.542774	0.00163828
Os08g0560000	-1.21895	1.04E-25
Os08g0560900	-0.873426	0.00665305
Os09g0128400	0.745835	1.23E-32
Os09g0247500	1.6604	0.00145922
Os09g0255000	0.694891	3.63E-18
Os09g0294000	0.533051	1.28E-20
Os09g0304500	1.9888	5.90E-06
Os09g0305300	2.22557	0.0188287
Os09g0306400	-0.700987	2.58E-49
Os09g0321900	-0.97476	2.93E-05
Os09g0323100	1.0577	2.85E-33
Os09g0323150	-11.088	5.56E-19
Os09g0325100	-0.991499	0.0377405
Os09g0325300	2.96374	1.84E-28
Os09g0327300	0.694839	1.15E-08
Os09g0327575	-5.91228	8.08E-25
Os09g0327600	0.77861	1.20E-05
Os09g0327800	2.85081	2.36E-28
Os09g0328066	2.9215	2.30E-23
Os09g0328600	3.00142	9.35E-05
Os09g0328800	2.94818	5.09E-13
Os09g0330000	-7.01004	6.07E-197
Os09g0330700	2.91954	5.30E-11
Os09g0334600	2.34116	5.54E-06
Os09g0337300	0.623417	1.91E-05
Os09g0339601	3.14668	3.22E-16
Os09g0343200	-0.533589	3.18E-21
Os09g0346500	-0.908577	1.51E-07
Os09g0348600	-2.24762	0.0238845
Os09g0353700	2.19446	4.49E-61
Os09g0356000	1.03773	2.53E-05
Os09g0356100	2.49392	4.89E-16
Os09g0356300	3.21696	4.66E-07
Os09g0356800	3.03027	4.78E-59
Os09g0357250	2.61688	3.09E-34
Os09g0357300	2.55927	3.34E-09
Os09g0357400	1.53032	3.05E-08
Os09g0358000	2.61428	5.18E-11
Os09g0358100	2.68741	8.47E-09
Os09g0365450	1.96237	0.0325198
Os09g0379600	-0.89347	0.0435526
Os09g0388400	-1.25611	3.00E-41
Os09g0394300	-0.516933	0.004877
Os09g0397300	0.565037	6.72E-72
Os09g0399800	-0.893878	6.80E-75
Os09g0403300	-0.685298	2.92E-06
Os09g0403967	0.85029	5.67E-11
Os09g0407700	-0.511681	0.00452276
Os09g0409000	-0.554965	0.00558252
Os09g0412700	-3.09542	0.018039
Os09g0417600	-1.02719	0.0318046
Os09g0424300	-0.662833	1.09E-57
Os09g0432900	0.59937	1.14E-05
Os09g0433000	-0.886697	3.46E-07
Os09g0435700	-1.95496	6.43E-04
Os09g0436000	0.911388	2.35E-08
Os09g0447300	-1.10616	3.44E-12
Os09g0447500	-1.04153	1.00E-05
Os09g0451000	-0.67592	0.00286558
Os09g0455300	1.70739	3.31E-05
Os09g0456900	1.56504	0.00246142
Os09g0457800	-3.6939	6.20E-08
Os09g0457900	-4.06535	8.88E-04
Os09g0458300	-0.737124	0.0176627
Os09g0460350	-5.12375	0.0105908
Os09g0460400	2.78931	0.0325233
Os09g0467400	-0.667112	4.04E-10
Os09g0468300	0.609714	0.0472251
Os09g0471000	2.22541	0.0141511
Os09g0471100	0.589609	4.04E-10
Os09g0472900	-3.09645	0.0185901
Os09g0478100	-0.573184	3.90E-10
Os09g0478900	5.80766	4.95E-04
Os09g0480300	-0.678184	0.0395085
Os09g0481400	0.564141	0.044004
Os09g0482400	1.20327	8.33E-69
Os09g0482660	-1.0352	0.0186453
Os09g0482761	-0.588959	4.72E-09
Os09g0482900	-0.689463	0.0259419
Os09g0491788	0.672115	7.52E-06
Os09g0495500	1.66334	0.0386643
Os09g0497900	0.690609	1.54E-06
Os09g0501100	-0.607956	0.0240596
Os09g0505000	0.587613	9.21E-04
Os09g0509700	0.553909	3.68E-05
Os09g0512000	8.07515	1.42E-09
Os09g0518200	-0.677132	9.39E-05
Os09g0521300	-4.75658	0.0318005
Os09g0522000	-2.91619	2.58E-07
Os09g0526600	-0.992889	3.58E-20
Os09g0526700	0.753211	3.62E-06
Os09g0536700	-0.563171	1.16E-31
Os09g0542900	-0.837038	0.0109952
Os09g0544000	-0.676037	7.86E-09
Os09g0549450	-1.01047	8.20E-27
Os09g0554200	0.568004	0.0355194
Os09g0562700	-0.536679	1.12E-04
Os09g0564200	-0.834502	5.08E-80
Os09g0570800	0.978033	0.0322428
Os10g0108700	2.9773	1.92E-16
Os10g0109300	-0.53648	3.99E-38
Os10g0114300	0.659519	0.00910842
Os10g0122400	-0.701241	1.07E-13
Os10g0125700	-0.610366	0.00492799
Os10g0127900	0.73813	4.23E-26
Os10g0132500	0.586464	1.20E-04
Os10g0140700	-0.672085	3.31E-05
Os10g0142600	3.36593	3.05E-45
Os10g0147400	-0.515481	5.86E-04
Os10g0151500	-5.20256	0.00686974
Os10g0154700	-1.12471	0.00926367
Os10g0162842	-2.93034	7.37E-04
Os10g0163370	-1.53241	0.029647
Os10g0165300	1.91387	1.78E-15
Os10g0171500	-0.654386	1.60E-09
Os10g0174751	-7.32817	1.71E-07
Os10g0185400	-0.977396	0.0142793
Os10g0190900	-0.602641	4.30E-04
Os10g0191300	-0.780986	6.45E-118
Os10g0198333	0.689888	0.0146894
Os10g0204400	0.82051	4.39E-16
Os10g0207400	1.00251	4.86E-17
Os10g0210500	-1.97404	9.67E-135
Os10g0315400	-11.937	4.43E-22
Os10g0315900	-8.56833	6.63E-11
Os10g0320001	-6.90662	2.50E-06
Os10g0320100	-0.70797	1.49E-05
Os10g0325400	-1.07484	5.94E-13
Os10g0333700	1.17799	1.68E-18
Os10g0340100	-3.07867	1.71E-20
Os10g0344900	-1.46833	0.00342473
Os10g0345600	-1.61348	0.00239269
Os10g0345650	1.11415	0.0030874
Os10g0360600	4.93249	0.0143257
Os10g0376200	-0.906326	3.66E-11
Os10g0381601	1.89071	1.51E-14
Os10g0388600	6.97095	1.21E-06
Os10g0389500	1.66976	1.43E-04
Os10g0395200	0.962421	0.00188878
Os10g0398100	-0.623802	5.28E-06
Os10g0399901	-1.94483	0.00446127
Os10g0403000	-0.723424	0.0228438
Os10g0411500	-0.813359	0.00111553
Os10g0415800	0.554998	8.61E-11
Os10g0416500	-2.18329	1.48E-61
Os10g0418300	-0.50877	2.47E-04
Os10g0419300	-0.81158	7.12E-09
Os10g0419400	0.796294	8.39E-13
Os10g0421500	-0.531319	0.0241596
Os10g0422200	0.51485	0.0120103
Os10g0442400	-0.599395	1.24E-05
Os10g0444700	-0.552987	7.31E-30
Os10g0450800	-2.16199	0.0192003
Os10g0450900	-1.63953	3.19E-08
Os10g0452100	-1.51452	4.32E-04
Os10g0453900	1.08179	2.05E-39
Os10g0454300	0.604909	3.89E-11
Os10g0459300	-0.722985	8.57E-04
Os10g0460900	0.535741	0.0175716
Os10g0461100	0.605877	1.21E-08
Os10g0469900	0.580561	0.0118679
Os10g0470100	-0.722752	0.00337371
Os10g0471100	-5.27375	0.0050869
Os10g0475900	0.826947	0.00634849
Os10g0481000	0.528923	0.00169194
Os10g0484700	1.14055	1.94E-07
Os10g0485400	1.99005	4.00E-12
Os10g0487600	0.605679	4.86E-04
Os10g0488300	-6.53726	1.74E-05
Os10g0489650	2.14783	2.77E-14
Os10g0490100	-1.30245	3.21E-53
Os10g0490900	0.612477	0.0450108
Os10g0491100	1.63487	5.99E-08
Os10g0492400	-0.707951	0.00769766
Os10g0493300	1.80352	5.20E-198
Os10g0493800	0.632769	3.12E-04
Os10g0495100	1.44055	4.13E-05
Os10g0496000	-0.60324	3.32E-04
Os10g0497200	-5.99375	3.23E-04
Os10g0497300	-0.955321	1.17E-04
Os10g0497700	1.85164	4.04E-15
Os10g0498100	-1.10261	4.01E-14
Os10g0498200	0.718705	4.92E-06
Os10g0498300	-2.25302	0.00432307
Os10g0500650	-1.22526	0.046551
Os10g0502000	1.09656	2.39E-04
Os10g0503800	0.868289	5.32E-08
Os10g0504900	-4.85997	0.0210367
Os10g0506900	1.89573	5.97E-119
Os10g0507000	1.69864	4.72E-10
Os10g0507500	1.00044	0.00112639
Os10g0508700	0.971372	4.07E-04
Os10g0509100	0.959205	9.41E-83
Os10g0509401	-1.14541	5.14E-04
Os10g0510000	-0.721819	1.81E-53
Os10g0513200	0.605214	1.06E-20
Os10g0515200	1.46011	3.28E-07
Os10g0518400	2.04902	0.00136683
Os10g0520400	1.00338	0.00846098
Os10g0521100	1.36999	5.10E-04
Os10g0521400	-0.629224	0.0168597
Os10g0522400	0.524515	2.34E-04
Os10g0522900	0.794866	1.49E-35
Os10g0523201	-3.86932	0.00241626
Os10g0524600	0.919108	1.59E-10
Os10g0525000	-2.857	7.89E-19
Os10g0525800	-3.25732	2.92E-21
Os10g0527800	1.94217	1.96E-191
Os10g0528100	-2.19439	6.17E-28
Os10g0528200	-3.05505	4.23E-09
Os10g0528300	1.06563	2.29E-16
Os10g0529500	-0.538984	0.0210335
Os10g0529800	1.69972	3.14E-54
Os10g0530400	0.805881	8.29E-04
Os10g0530900	1.2539	2.43E-103
Os10g0531300	2.54506	1.92E-06
Os10g0531400	1.79233	4.39E-64
Os10g0532800	1.29273	3.29E-07
Os10g0533200	1.00506	2.73E-05
Os10g0535800	-0.562865	0.00329801
Os10g0536100	-2.19961	1.74E-208
Os10g0538200	-2.52372	5.76E-111
Os10g0538450	-2.64413	6.75E-07
Os10g0540050	0.774758	0.00746923
Os10g0540300	1.77323	5.63E-143
Os10g0540800	0.928934	1.41E-06
Os10g0540900	1.70471	2.63E-34
Os10g0541000	0.710589	2.98E-08
Os10g0542900	-0.840225	1.84E-10
Os10g0543500	1.04795	3.30E-11
Os10g0545300	0.544741	1.26E-06
Os10g0546100	-0.816868	8.16E-10
Os10g0548000	-1.95819	7.51E-22
Os10g0548200	0.620128	1.92E-27
Os10g0548300	0.823723	1.78E-10
Os10g0548900	0.696613	0.00175676
Os10g0549500	-9.37974	2.30E-13
Os10g0550000	-0.80895	1.06E-27
Os10g0550200	0.614764	0.00101469
Os10g0550775	2.09633	0.010107
Os10g0550800	-1.09927	4.88E-09
Os10g0550900	-1.06435	1.52E-72
Os10g0552200	-0.578241	6.52E-10
Os10g0552300	-0.650823	2.15E-23
Os10g0552600	0.783787	1.33E-20
Os10g0552700	1.38793	8.58E-163
Os10g0553300	-0.781299	5.64E-17
Os10g0553800	0.53547	7.19E-10
Os10g0554200	-1.34814	3.49E-42
Os10g0555900	-0.582251	2.94E-15
Os10g0560000	0.555644	2.07E-08
Os10g0562000	0.607001	7.14E-06
Os10g0565150	0.98746	5.72E-34
Os10g0567900	2.41614	1.44E-37
Os10g0568900	0.596564	8.97E-04
Os10g0569400	-0.590372	1.77E-16
Os10g0577500	-0.544073	9.32E-06
Os10g0578700	1.03772	0.0407298
Os11g0100300	-1.75711	9.98E-07
Os11g0106700	0.510742	0.0114001
Os11g0108932	-0.567922	7.96E-11
Os11g0112200	-1.52352	2.92E-05
Os11g0115350	-3.62053	0.00124386
Os11g0115400	-1.45444	0.00584276
Os11g0117900	-0.636694	5.86E-04
Os11g0132400	0.837273	3.87E-04
Os11g0133001	0.654496	6.72E-04
Os11g0133800	-0.6574	5.09E-06
Os11g0135000	0.705085	3.72E-08
Os11g0138900	-0.662344	1.51E-34
Os11g0139700	0.768992	7.76E-11
Os11g0144900	0.857218	1.10E-09
Os11g0145200	0.737913	7.93E-05
Os11g0150800	-0.838403	0.0159573
Os11g0154500	1.44669	2.41E-04
Os11g0156000	1.40603	6.06E-07
Os11g0156050	3.57722	0.00130232
Os11g0156750	0.61955	9.34E-04
Os11g0156800	0.526316	7.25E-04
Os11g0160550	-0.656998	0.00872693
Os11g0161700	1.32459	0.0215519
Os11g0170900	2.81713	1.37E-31
Os11g0171300	-0.790587	0.00131986
Os11g0179700	-0.592405	2.66E-15
Os11g0180100	-2.61756	0.00633962
Os11g0181900	0.714967	4.48E-06
Os11g0182200	0.622539	1.93E-06
Os11g0194900	0.507542	1.98E-18
Os11g0197975	2.20139	0.0125269
Os11g0198900	6.04694	1.46E-04
Os11g0199801	2.8883	1.43E-13
Os11g0200950	1.56533	6.02E-27
Os11g0201299	-1.52943	0.0154679
Os11g0202600	-1.12189	1.28E-08
Os11g0203400	5.15446	0.00682512
Os11g0204100	4.51248	4.64E-08
Os11g0204600	-0.569215	0.0280886
Os11g0205300	5.46285	0.00195204
Os11g0205800	-0.747097	2.74E-04
Os11g0206000	12.3206	1.47E-23
Os11g0210201	1.34112	0.0126659
Os11g0210300	0.806495	1.88E-24
Os11g0213000	0.712154	8.93E-08
Os11g0213700	0.645272	0.00257894
Os11g0229300	0.920605	0.0182651
Os11g0229500	-1.37392	4.16E-14
Os11g0235200	-0.643062	3.22E-06
Os11g0245900	0.609652	8.57E-04
Os11g0249000	1.27954	4.99E-07
Os11g0255300	-8.83158	5.50E-12
Os11g0258500	-0.670067	0.0100673
Os11g0259700	-0.585833	0.0278291
Os11g0260100	-0.591187	0.0294342
Os11g0274100	-1.78268	0.012503
Os11g0274700	-1.7691	8.28E-21
Os11g0275000	-0.685585	1.19E-04
Os11g0275200	-1.30133	1.28E-16
Os11g0278300	-2.54629	4.05E-27
Os11g0282700	3.217	6.54E-10
Os11g0282900	-1.26278	1.28E-08
[truncated: 281 more rows]
