# Supplementary material
Source: Research Square preprint supplement (doi:10.21203/rs.3.rs-8884320/v1)
Supplement: Supplementary file 2 [file 3080b4d56de0c08f877fb764.xlsx]

## Sheet:  Kyoto Encyclopedia of Genes an
Supplemental Table 3. Kyoto Encyclopedia of Genes and Genomes (KEGG) enrichment analysis of DEGs.
KEGG Pathway Term ID	KEGG Pathway Term Desc	KEGG Pathway Term Level1	Term Candidate Gene Num	Total Candidate Gene Num	Rich Ratio	Q value
904	Diterpenoid biosynthesis	Metabolism	14	822	0.107692	0.000352969
4712	Circadian rhythm - plant	Metabolism	11	822	0.0827068	0.0209003
943	Isoflavonoid biosynthesis	Metabolism	6	822	0.113208	0.0499713
940	Phenylpropanoid biosynthesis	Metabolism	29	822	0.0434132	0.0499713
4016	MAPK signaling pathway - plant	Metabolism	31	822	0.0402597	0.084357
710	Carbon fixation in photosynthetic organisms	Metabolism	9	822	0.0681818	0.084357
910	Nitrogen metabolism	Metabolism	5	822	0.0909091	0.151455
4075	Plant hormone signal transduction	Metabolism	23	822	0.0398614	0.185837
592	alpha-Linolenic acid metabolism	Metabolism	7	822	0.0598291	0.269362
480	Glutathione metabolism	Metabolism	9	822	0.0478723	0.409763
270	Cysteine and methionine metabolism	Metabolism	8	822	0.0467836	0.526635
300	Lysine biosynthesis	Metabolism	2	822	0.111111	0.56538
906	Carotenoid biosynthesis	Metabolism	4	822	0.0571429	0.625785
4626	Plant-pathogen interaction	Metabolism	36	822	0.030743	0.625785
960	Tropane, piperidine and pyridine alkaloid biosynthesis	Metabolism	3	822	0.0652174	0.625785
860	Porphyrin metabolism	Metabolism	4	822	0.0547945	0.625785
630	Glyoxylate and dicarboxylate metabolism	Metabolism	6	822	0.0447761	0.634135
520	Amino sugar and nucleotide sugar metabolism	Metabolism	15	822	0.0331858	0.785594
73	Cutin, suberine and wax biosynthesis	Metabolism	4	822	0.0454545	0.858432
53	Ascorbate and aldarate metabolism	Metabolism	5	822	0.0406504	0.859098
