# Supplementary material
Source: Research Square preprint supplement (doi:10.21203/rs.3.rs-8884320/v1)
Supplement: Supplementary file 3 [file 4c44025e9a8ba68ec43cc1d2.xlsx]

## Sheet: List of primers used in this st
Supplemental Table 4. List of primers used in this study.
Name	Primer Sequence (5'-3')
Primers for RT-qPCR
HKT1;5-F	GGTCAACTCGAGGCACTCC
HKT1;5-R	AGGTGGCAGGTACATCATCAC
HKT2;1-F	GCTTGCCTGCATCTCAGTCT
HKT2;1-R	ACATTCCCATATGCACTGATGA
Prx102-F	CGAGCTCATCGAGTCCATCAA
Prx102-R	AGTAGTCCACCTTCACCTCGG
IRL-F	AAGCAAATCCAGGAGTCGGA
IRL-R	CCCTTATGTACCCTGCGTGC
RBOHA-F	GGGAAATGCACAACGAAGTT
RBOHA-R	TCTATCCTTGTTTCCCCTCAA
RBOHB-F	TCAGCAGATTTCACCCACAA
RBOHB-R	AACCATACACGGGTATTTCTCAA
PAO3-F	GGCAAACCTCGTGACCTGTA
PAO3-R	GAACCGCTCAAGAACCCTCA
PAO4-F	AGTTGCCCTCATGGAAGAGC
PAO4-R	CAGATCAACGGCCTCCTTGT
pre-miR156a-F	ATCTACTCGTACTAGGAGGG
pre-miR156a-R	AGAGAGATAAAAGGGGTGG
pre-miR156b-F	CTCTATGGGTTTTGGAGGTC
pre-miR156b-R	CATATTGGGCATGGTGAACG
pre-miR156c-F	GAGGTGAGGCTGACAGAAG
pre-miR156c-R	GAGAGATCAAATGGCTGACAG
pre-miR156d-F	GAGAAGCTCTCATGAGATTG
pre-miR156d-R	TTGAGCCCTGAGAGAAAGAG
pre-miR156e-F	CAGAAGAGAGTGAGCACACGG
pre-miR156e-R	GAAAGAGCAGTGAGCACGCG
pre-miR156g-F	GCGGCTGGCTGACAGAAG
pre-miR156g-R	CCGAGAGAGAGAGAGAGAGAGC
pre-miR156i-F	CTGGGCGGTGACAGAAGAG
pre-miR156i-R	GGGGGTGGGAGAGGAGTG
pre-miR156j-F	GCATATGAAAGGCGAGATTG
pre-miR156j-R	GGAGGGAGTGATGAGAGATG
pre-miR156k-F	CAGTTGAGACTTGAGAGTGATG
pre-miR156k-R	GAGATGGACGGCAATGAC
pre-miR156l-F	GAACAAAAGAGCTAGGGAGC
pre-miR156l-R	GAGAGGGAGGGAGATAATTTG
SPL2-F	GCAGGTTTCATTTGCTCGGG
SPL2-R	CCGTGGTGATTGGCGAAAAG
SPL3-F	AGGAAATAGCGCGAACGAGA
SPL3-R	TGGCCTATGTCAACCCCAAC
SPL4-F	ACGCCTGTATGACCACAACG
SPL4-R	GGCCTTACATGGCTGAGTGG
SPL11-F	CGACGGAAACCACAGACAGA
SPL11-R	TGCATGGTTAAGTGGAGCGT
SPL13-F	TCAAGGGAAACACCCCGAAG
SPL13-R	CAGAAGAGAGAGAGCACGCC
SPL14-F	CATCTGTTGGTGAGCATCGC
SPL14-R	GCATTCCTTACGCTGCTTGG
SPL16-F	AGCCAACAAGGGGCAAGATT
SPL16-R	ATGGGCTCTCCTCGGTTTTG
SPL17-F	CCAACAGTGCAGCAGGTTC
SPL17-R	GCGAGAAGAAAGAGGTCCAGG
SPL18-F	ACGAGATGAACTACCACGGC
SPL18-R	CTACTGCCACGAGAATGGGA
actin-F	ATCCTTCGTCTCGACCTTGC
actin-R	TGGCAGTCTCCATTTCCTGG
