# Supplementary material
Source: Research Square preprint supplement (doi:10.21203/rs.3.rs-8884320/v1)
Supplement: Supplementary file 5 [file 95514cb3d2e6de78dc470919.xlsx]

## Sheet: Gene ontology (GO) enrichment a
Supplemental Table 2. Gene ontology (GO) enrichment analysis of DEGs.
GO_P Term ID	GO_P Term Desc	GO_P Term Level1	Term Candidate Gene Num	Total Candidate Gene Num	Rich Ratio	Q value
GO:0042744	hydrogen peroxide catabolic process	biological_process	16	822	0.111111	5.63953e-05
GO:0005992	trehalose biosynthetic process	biological_process	6	822	0.272727	0.000842267
GO:0016102	diterpenoid biosynthetic process	biological_process	5	822	0.357143	0.000842267
GO:0006979	response to oxidative stress	biological_process	16	822	0.0808081	0.000940715
GO:0006749	glutathione metabolic process	biological_process	10	822	0.111111	0.00206767
GO:0009686	gibberellin biosynthetic process	biological_process	5	822	0.238095	0.00373967		Supplemental Table 2. Gene ontology (GO) enrichment analysis of DEGs.
GO:0006952	defense response	biological_process	24	822	0.0490798	0.0163686
GO:0016125	sterol metabolic process	biological_process	6	822	0.122449	0.0259243
GO:0010017	red or far-red light signaling pathway	biological_process	2	822	0.666667	0.0353716
GO:0015706	nitrate transport	biological_process	2	822	0.666667	0.0353716
GO:0006814	sodium ion transport	biological_process	2	822	0.4	0.0879066
GO:0010039	response to iron ion	biological_process	2	822	0.4	0.0879066
GO:0051502	diterpene phytoalexin biosynthetic process	biological_process	2	822	0.4	0.0879066
GO:0019253	reductive pentose-phosphate cycle	biological_process	3	822	0.1875	0.0890232
GO:0010099	regulation of photomorphogenesis	biological_process	2	822	0.333333	0.0992756
GO:0010241	ent-kaurene oxidation to kaurenoic acid	biological_process	2	822	0.333333	0.0992756
GO:0098542	defense response to other organism	biological_process	2	822	0.333333	0.0992756
GO:0009086	methionine biosynthetic process	biological_process	3	822	0.142857	0.142182
GO:0009853	photorespiration	biological_process	3	822	0.130435	0.142182
GO:0006826	iron ion transport	biological_process	2	822	0.222222	0.142182
